# Supplementary material
Source: PubMed Central journal article supplement (PMC10514237)
Supplement: NIHMS1876213-supplement-supinfo2.pdf [file NIHMS1876213-supplement-supinfo2.pdf]

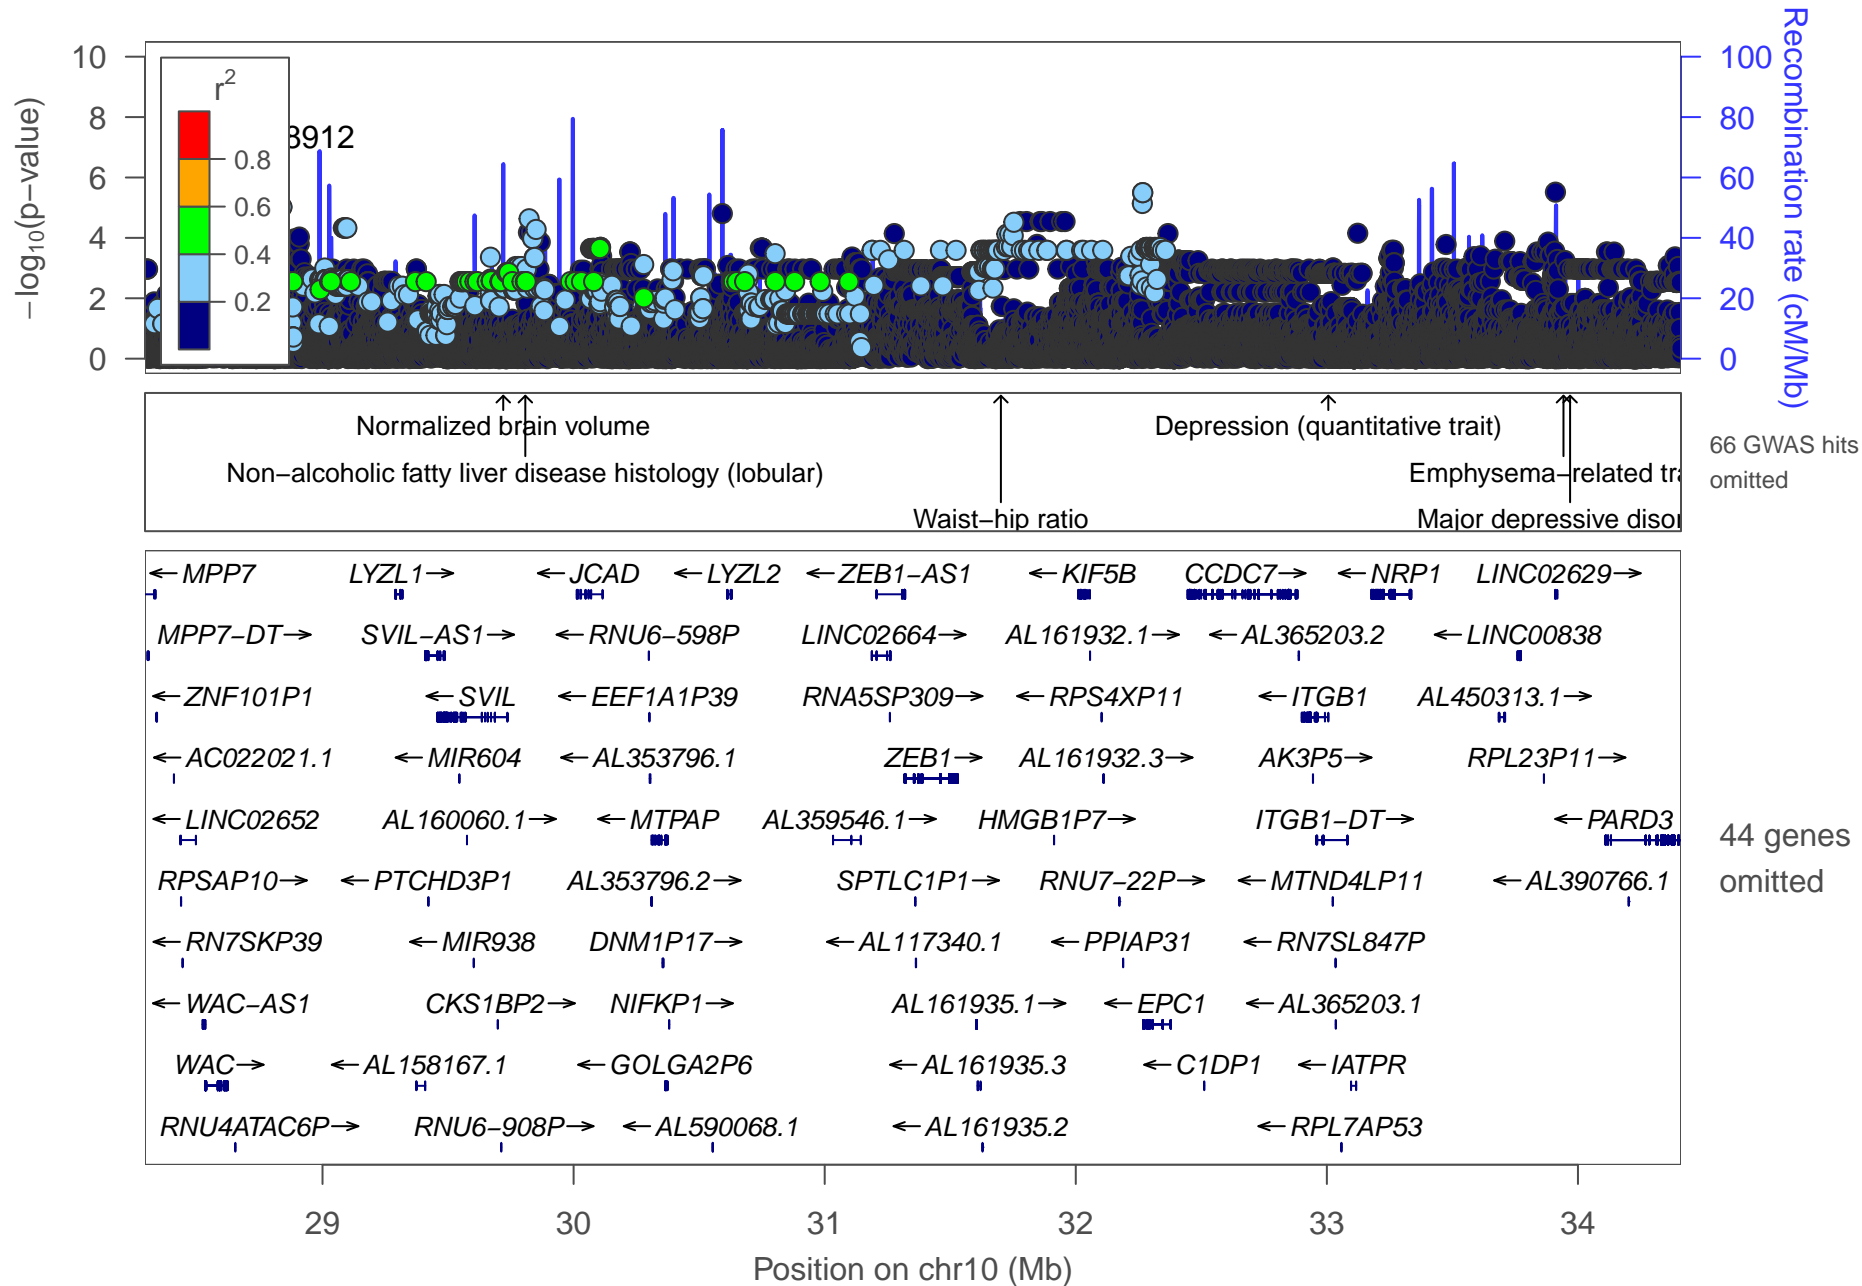

date: Thu Oct 20 22:13:40 2022

build: hg38

display range: chr10:28292958–34410406 [28292958–34410406]

hilite range: 0 – 0 [ 0 – 0 ]

reference SNP: chr10:28792958

number of SNPs plotted: 24287

min P-value: 5.25E-7 [chr10:28792958]

max P-value: 10E-1 [chr10:32084757]

omitted Genes: TPRKBP1, RNU6-1067P, BAMBI

omitted Genes: LINC01517, AL355376.1, RNU6-270P

omitted Genes: LINC00837, AL355376.2, RNA5SP308

omitted Genes: RPL21P93, AL353093.1, RN7SL241P

omitted Genes: MIR7162, AL161651.1, CCND3P1

omitted Genes: MAP3K8, HNRNPA1P32, AL590068.4

omitted Genes: RN7SL63P, AL590068.2, AL590068.3

omitted Genes: SVIL2P, LINC02644, ZNF438

omitted Genes: AL359532.1, DDX10P1, MACORIS

omitted Genes: AL353769.1, ARHGAP12, RPL34P19

omitted Genes: RN7SL825P, AL161932.2, RPS24P13

omitted Genes: AL158834.2, AL158834.1, AL391839.2

omitted Genes: AL391839.1, RNU6-1244P, AL391839.3

omitted Genes: AL121748.1, RN7SL398P, AL353600.1

omitted Genes: AL353600.2, LINC02628

Make more plots at <http://csg.sph.umich.edu/locuszoom/>

GWAS Catalog SNPs in Region

| chr | pos (Mb) | trait                                                      | snp         |
|-----|----------|------------------------------------------------------------|-------------|
| 10  | 28.30145 | Diisocyanate-induced asthma                                | rs115882204 |
| 10  | 28.32871 | Pulmonary function decline                                 | rs1148186   |
| 10  | 28.34873 | Lung cancer                                                | rs7900823   |
| 10  | 28.42068 | Pelvic organ prolapse                                      | rs10826468  |
| 10  | 28.46318 | Obesity-related traits                                     | rs2153299   |
| 10  | 28.46633 | Aggressiveness in attention deficit hyperactivity disorder | rs117063229 |
| 10  | 28.56309 | Alzheimer disease and age of onset                         | rs181666690 |
| 10  | 28.68808 | Percentage gas trapping                                    | rs655766    |
| 10  | 28.73829 | Preeclampsia                                               | rs1248993   |
| 10  | 28.94747 | Aggressiveness in attention deficit hyperactivity disorder | rs10826545  |
| 10  | 28.94853 | Aggressiveness in attention deficit hyperactivity disorder | rs10826546  |
| 10  | 28.95728 | Aggressiveness in attention deficit hyperactivity disorder | rs117352156 |
| 10  | 28.95732 | Aggressiveness in attention deficit hyperactivity disorder | rs188370812 |
| 10  | 28.95732 | Aggressiveness in attention deficit hyperactivity disorder | rs192649950 |
| 10  | 28.96666 | Aggressiveness in attention deficit hyperactivity disorder | rs10826548  |
| 10  | 29.00010 | Cannabis dependence                                        | rs11007350  |
| 10  | 29.00297 | Major depressive disorder (broad)                          | rs1612122   |
| 10  | 29.04792 | Palmitoleic acid (16:1n-7) plasma levels                   | rs788076    |
| 10  | 29.07577 | Migraine with aura                                         | rs10826566  |
| 10  | 29.09798 | Gut microbiota (bacterial taxa)                            | rs1248290   |
| 10  | 29.09971 | Gut microbiota (bacterial taxa)                            | rs1889714   |

GWAS Catalog SNPs in Region

| chr | pos (Mb) | trait                                                        | snp         |
|-----|----------|--------------------------------------------------------------|-------------|
| 10  | 29.19844 | Methotrexate pharmacokinetics (acute lymphoblastic leukemia) | rs4387258   |
| 10  | 29.52367 | Platelet thrombus formation                                  | rs7070678   |
| 10  | 29.71973 | Normalized brain volume                                      | rs1927457   |
| 10  | 29.79843 | Migraine with aura                                           | rs2986961   |
| 10  | 29.80770 | Non-alcoholic fatty liver disease histology (lobular)        | rs2986971   |
| 10  | 29.88896 | Orofacial clefts                                             | rs3006564   |
| 10  | 29.94094 | Alzheimer disease and age of onset                           | rs146650065 |
| 10  | 29.94526 | Emphysema distribution in smoking                            | rs35374984  |
| 10  | 30.02714 | Coronary heart disease                                       | rs3739998   |
| 10  | 30.03496 | Coronary artery disease                                      | rs2487928   |
| 10  | 30.04619 | Coronary heart disease                                       | rs2505083   |
| 10  | 30.04619 | Myocardial infarction                                        | rs2505083   |
| 10  | 30.20178 | Suicide risk                                                 | rs2462021   |
| 10  | 30.23090 | Pancreatitis                                                 | rs2995271   |
| 10  | 30.28801 | 3-hydroxypropylmercapturic acid levels in smokers            | rs12220014  |
| 10  | 30.40257 | Inflammatory bowel disease                                   | rs2050392   |
| 10  | 30.43917 | Crohn's disease                                              | rs1042058   |
| 10  | 30.43917 | Inflammatory bowel disease                                   | rs1042058   |
| 10  | 30.54570 | QT interval                                                  | rs11008099  |
| 10  | 30.61036 | Bone mineral density (femoral neck)                          | rs73245065  |
| 10  | 30.62310 | Dental caries                                                | rs399593    |



GWAS Catalog SNPs in Region

| chr | pos (Mb) | trait                                                      | snp         |
|-----|----------|------------------------------------------------------------|-------------|
| 10  | 30.75356 | Congenital left-sided heart lesions (maternal effect)      | rs11008222  |
| 10  | 30.83824 | Height                                                     | rs12413361  |
| 10  | 31.07734 | Response to antipsychotic treatment                        | rs2994684   |
| 10  | 31.11547 | Late-onset Alzheimer's disease                             | rs141387448 |
| 10  | 31.12618 | Multiple sclerosis                                         | rs793108    |
| 10  | 31.12618 | Rheumatoid arthritis                                       | rs793108    |
| 10  | 31.17267 | Glucose homeostasis traits                                 | rs1148233   |
| 10  | 31.20705 | Disc degeneration (lumbar)                                 | rs1250307   |
| 10  | 31.22317 | Disc degeneration (lumbar)                                 | rs2484992   |
| 10  | 31.22620 | Disc degeneration (lumbar)                                 | rs2484990   |
| 10  | 31.67980 | C-reactive protein levels                                  | rs796127    |
| 10  | 31.69246 | Cannabis dependence                                        | rs115553536 |
| 10  | 31.70170 | Waist-hip ratio                                            | rs7081678   |
| 10  | 31.99136 | Alzheimer disease and age of onset                         | rs211257    |
| 10  | 32.00401 | Schizophrenia                                              | rs1251350   |
| 10  | 32.02008 | Bipolar disorder with mood-incongruent psychosis           | rs1775715   |
| 10  | 32.33609 | Serum dimethylarginine levels (asymmetric/symmetric ratio) | rs143713361 |
| 10  | 32.34604 | Sexual dysfunction (female)                                | rs2370759   |
| 10  | 32.70434 | Suicide in bipolar disorder                                | rs7079041   |
| 10  | 32.87929 | Post bronchodilator FEV1/FVC ratio                         | rs183323229 |
| 10  | 33.00585 | Depression (quantitative trait)                            | rs11009175  |

## GWAS Catalog SNPs in Region

| <b>chr</b> | <b>pos (Mb)</b> | <b>trait</b>                                    | <b>snp</b> |
|------------|-----------------|-------------------------------------------------|------------|
| 10         | 33.11616        | IgG glycosylation                               | rs7902627  |
| 10         | 33.17920        | Migraine                                        | rs2506142  |
| 10         | 33.18582        | Parental extreme longevity (95 years and older) | rs12768811 |
| 10         | 33.18635        | Tetralogy of Fallot                             | rs2228638  |
| 10         | 33.21425        | Migraine                                        | rs2506155  |
| 10         | 33.32711        | Parental extreme longevity (95 years and older) | rs2804497  |
| 10         | 33.79912        | Schizophrenia                                   | rs1412115  |
| 10         | 33.94235        | Emphysema-related traits                        | rs7905537  |
| 10         | 33.96868        | Major depressive disorder                       | rs1780436  |

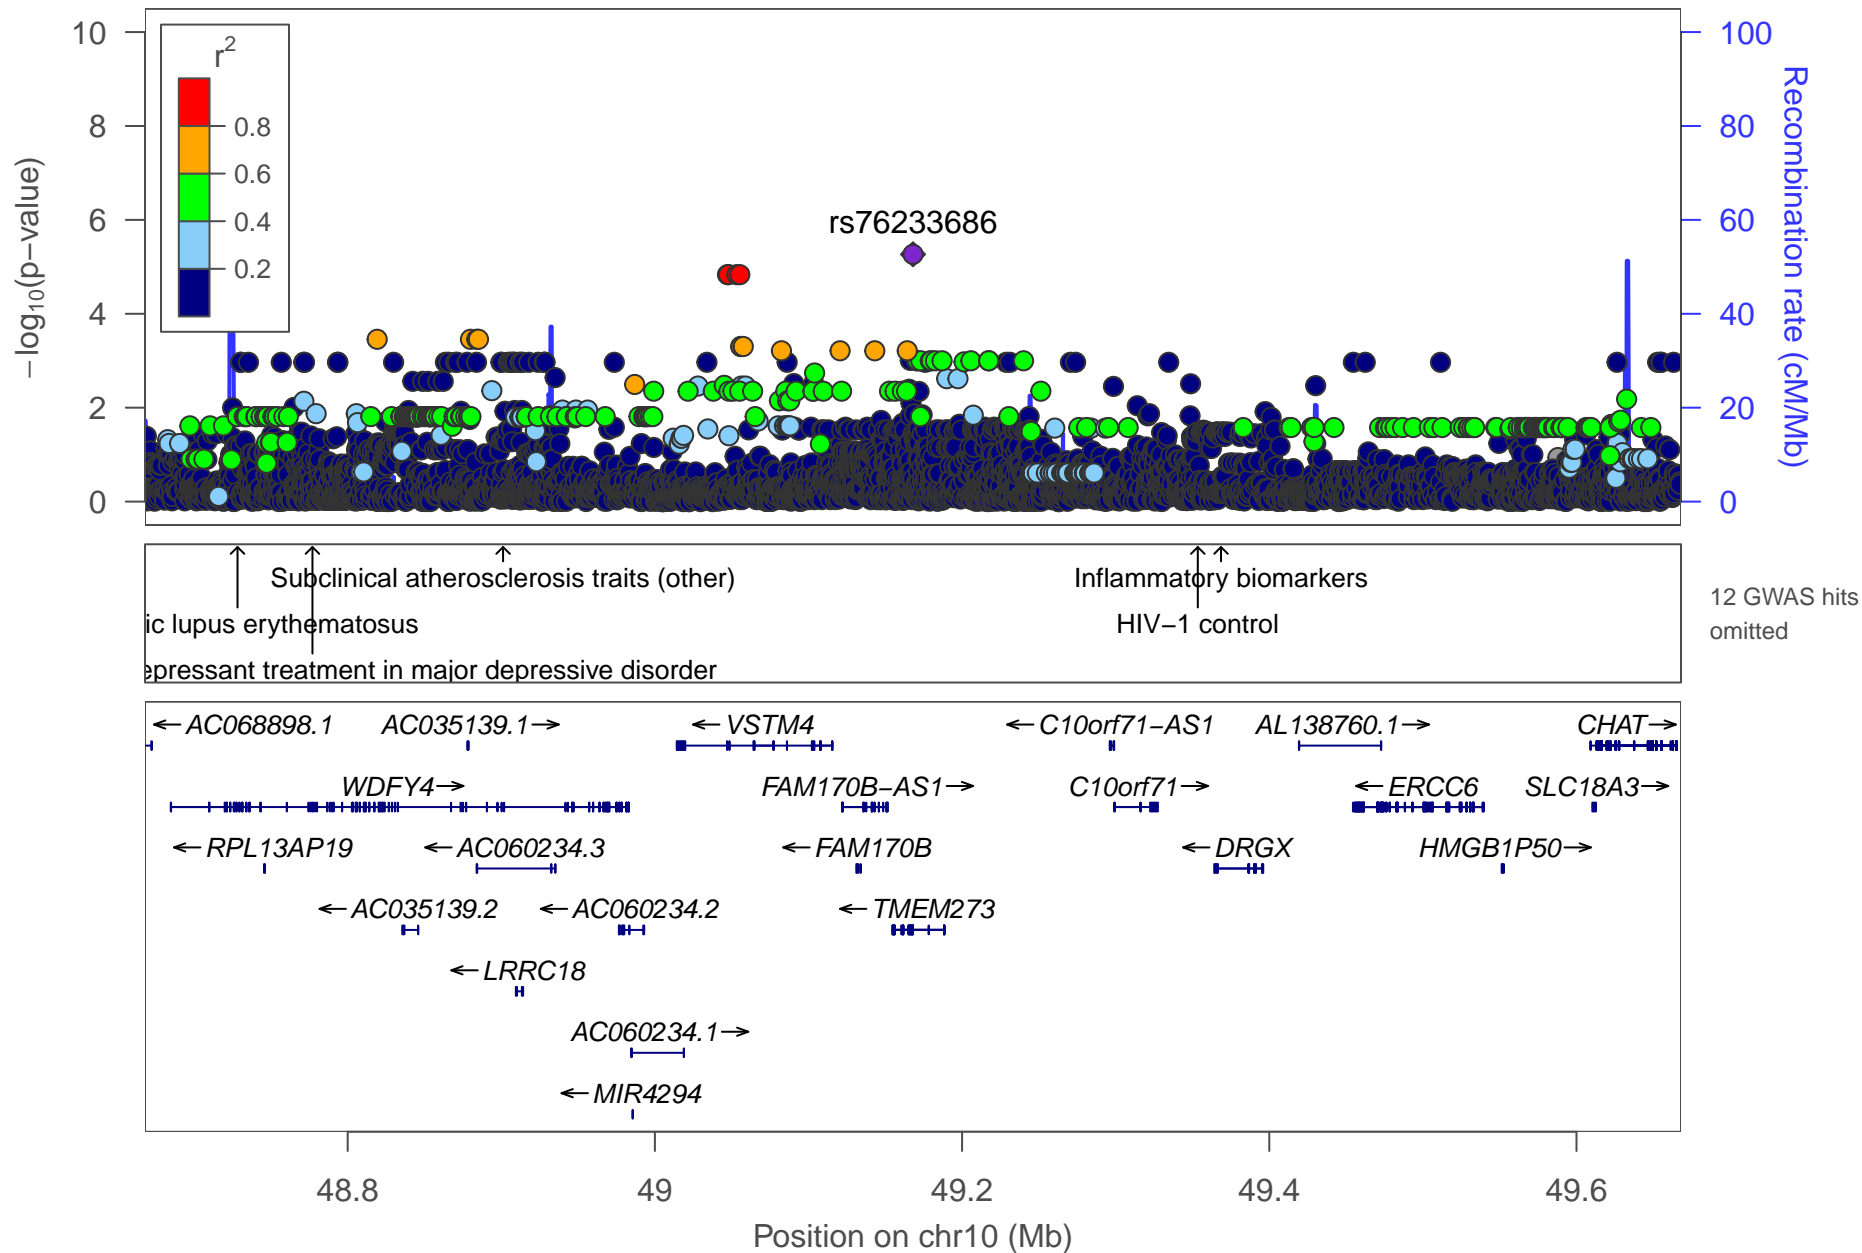

date: Thu Oct 20 22:13:35 2022

build: hg38

display range: chr10:48668045–49668045 [48668045–49668045]

hilite range: 0 – 0 [ 0 – 0 ]

reference SNP: chr10:49168045

number of SNPs plotted: 4483

min P-value: 5.41E–6 [chr10:49168045]

max P-value: 10E–1 [chr10:49018759]

omitted GWAS Hits: chr10:49.353462–HIV–1 control, NA

omitted GWAS Hits: NA, NA

omitted GWAS Hits: NA, NA

omitted GWAS Hits: NA, NA

GWAS Catalog SNPs in Region

| chr | pos (Mb) | trait                                                              | snp         |
|-----|----------|--------------------------------------------------------------------|-------------|
| 10  | 48.70331 | Stroke                                                             | rs17771318  |
| 10  | 48.72829 | Systemic lupus erythematosus                                       | rs11101442  |
| 10  | 48.77707 | Response to anti-depressant treatment in major depressive disorder | rs10857636  |
| 10  | 48.81012 | Systemic lupus erythematosus                                       | rs2928402   |
| 10  | 48.81735 | Systemic lupus erythematosus                                       | rs7097397   |
| 10  | 48.83491 | Systemic lupus erythematosus                                       | rs877819    |
| 10  | 48.86135 | Systemic lupus erythematosus                                       | rs2663052   |
| 10  | 48.88977 | Rheumatoid arthritis                                               | rs2671692   |
| 10  | 48.89503 | Airway responsiveness in chronic obstructive pulmonary disease     | rs12252129  |
| 10  | 48.90118 | Subclinical atherosclerosis traits (other)                         | rs3849150   |
| 10  | 48.91101 | Systemic lupus erythematosus                                       | rs1913517   |
| 10  | 49.02159 | Migraine with aura                                                 | rs2137920   |
| 10  | 49.24589 | Plasma omega-6 polyunsaturated fatty acid levels (linoleic acid)   | rs17009617  |
| 10  | 49.29241 | Oleic acid (18:1n-9) plasma levels                                 | rs17774576  |
| 10  | 49.31570 | Alzheimer disease and age of onset                                 | rs117850870 |
| 10  | 49.35346 | HIV-1 control                                                      | rs4838508   |
| 10  | 49.36859 | Inflammatory biomarkers                                            | rs12220898  |



date: Thu Oct 20 22:13:36 2022

build: hg38

display range: chr10:61630–1080236 [61630–1080236]

hilite range: 0 – 0 [ 0 – 0 ]

reference SNP: chr10:580238

number of SNPs plotted: 2940

min P-value: 7.82E–6 [chr10:561630]

max P-value: 9.99E–1 [chr10:759496]

omitted GWAS Hits: chr10:1.01977–Chronic kidney disease, NA

omitted GWAS Hits: NA, NA

## GWAS Catalog SNPs in Region

| <b>chr</b> | <b>pos (Mb)</b> | <b>trait</b>                                         | <b>snp</b> |
|------------|-----------------|------------------------------------------------------|------------|
| 10         | 0.272136        | Blood metabolite levels                              | rs12246027 |
| 10         | 0.378205        | Neuroticism                                          | rs77829203 |
| 10         | 0.520439        | Psychosis in Alzheimer's disease                     | rs11252926 |
| 10         | 0.572745        | Immune reponse to smallpox (secreted IFN- $\alpha$ ) | rs17221323 |
| 10         | 0.713328        | Migraine                                             | rs7916968  |
| 10         | 0.725592        | Uric acid levels                                     | rs877282   |
| 10         | 0.791467        | Survival in rectal cancer                            | rs1555895  |
| 10         | 1.019770        | Chronic kidney disease                               | rs1044261  |
| 10         | 1.019770        | Glomerular filtration rate (creatinine)              | rs1044261  |
| 10         | 1.032842        | Response to angiotensin II receptor blocker therapy  | rs12762955 |



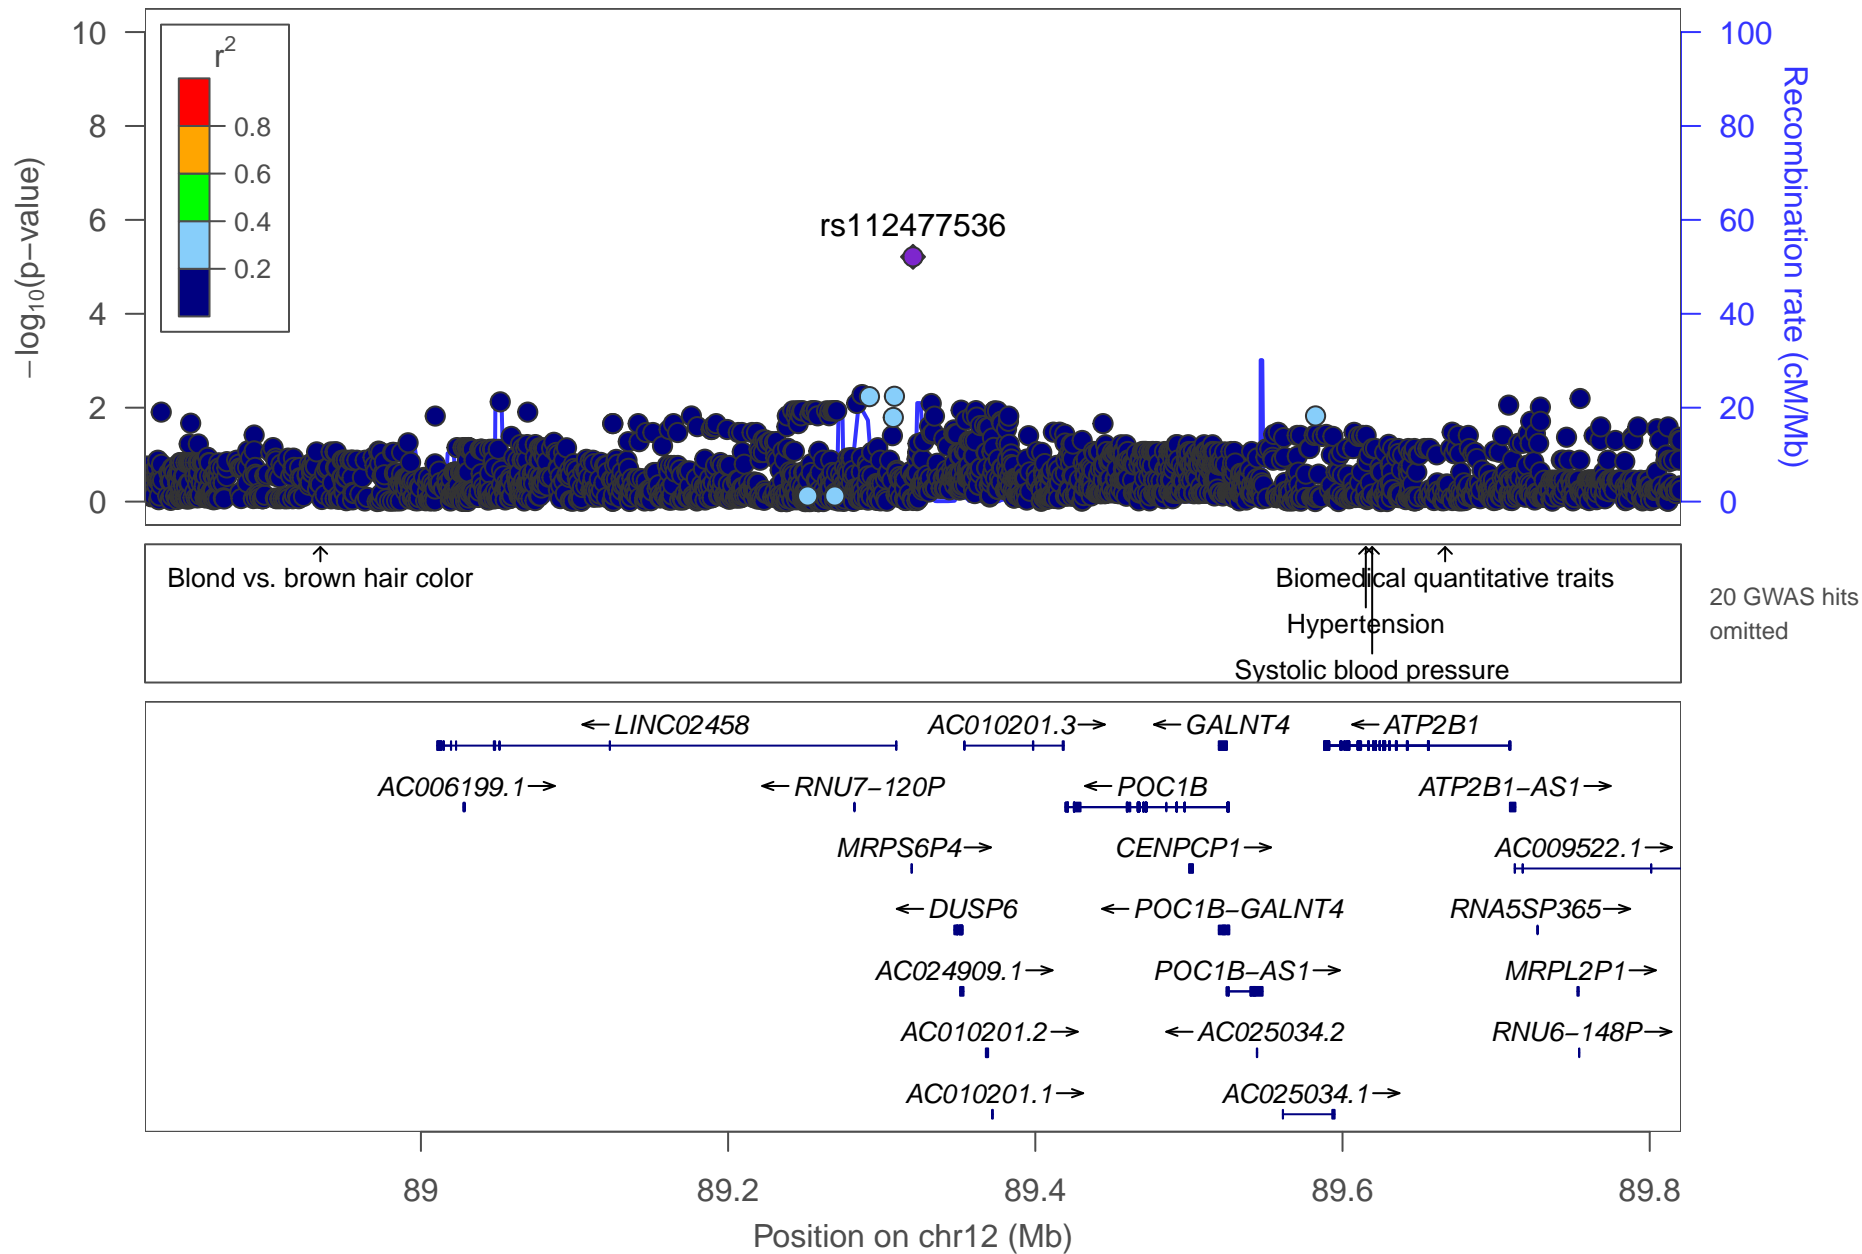

date: Thu Oct 20 22:13:34 2022

build: hg38

display range: chr12:88820371–89820371 [88820371–89820371]

hilite range: 0 – 0 [ 0 – 0 ]

reference SNP: chr12:89320371

number of SNPs plotted: 2375

min P-value: 6.12E–6 [chr12:89320371]

max P-value: 9.99E–1 [chr12:89234726]

omitted GWAS Hits: NA, NA

GWAS Catalog SNPs in Region

| chr | pos (Mb) | trait                                       | snp         |
|-----|----------|---------------------------------------------|-------------|
| 12  | 88.89548 | Bone mineral density (femoral neck)         | rs191780267 |
| 12  | 88.93456 | Blond vs. brown hair color                  | rs12821256  |
| 12  | 88.93456 | Hair color                                  | rs12821256  |
| 12  | 88.93456 | Blond vs non-blond hair color               | rs12821256  |
| 12  | 88.93456 | Brown vs. non-brown hair color              | rs12821256  |
| 12  | 88.93456 | Light vs. dark hair color                   | rs12821256  |
| 12  | 89.38182 | Night sleep phenotypes                      | rs61925087  |
| 12  | 89.44709 | Schizophrenia                               | rs10777165  |
| 12  | 89.50361 | NT-proBNP levels in acute coronary syndrome | rs11105306  |
| 12  | 89.54777 | Blood pressure                              | rs4842666   |
| 12  | 89.61518 | Hypertension                                | rs2681472   |
| 12  | 89.61518 | Diastolic blood pressure                    | rs2681472   |
| 12  | 89.61518 | Coronary artery disease                     | rs2681472   |
| 12  | 89.61518 | Myocardial infarction                       | rs2681472   |
| 12  | 89.61518 | Systolic blood pressure                     | rs2681472   |
| 12  | 89.61931 | Systolic blood pressure                     | rs2681492   |
| 12  | 89.66681 | Biomedical quantitative traits              | rs17249754  |
| 12  | 89.66681 | Blood pressure                              | rs17249754  |
| 12  | 89.66681 | Systolic blood pressure                     | rs17249754  |
| 12  | 89.66681 | Diastolic blood pressure                    | rs17249754  |
| 12  | 89.66681 | Hypertension                                | rs17249754  |

## GWAS Catalog SNPs in Region

| <b>chr</b> | <b>pos (Mb)</b> | <b>trait</b>           | <b>snp</b> |
|------------|-----------------|------------------------|------------|
| 12         | 89.66681        | Mean arterial pressure | rs17249754 |
| 12         | 89.66681        | Pulse pressure         | rs17249754 |
| 12         | 89.68741        | Coronary heart disease | rs7136259  |

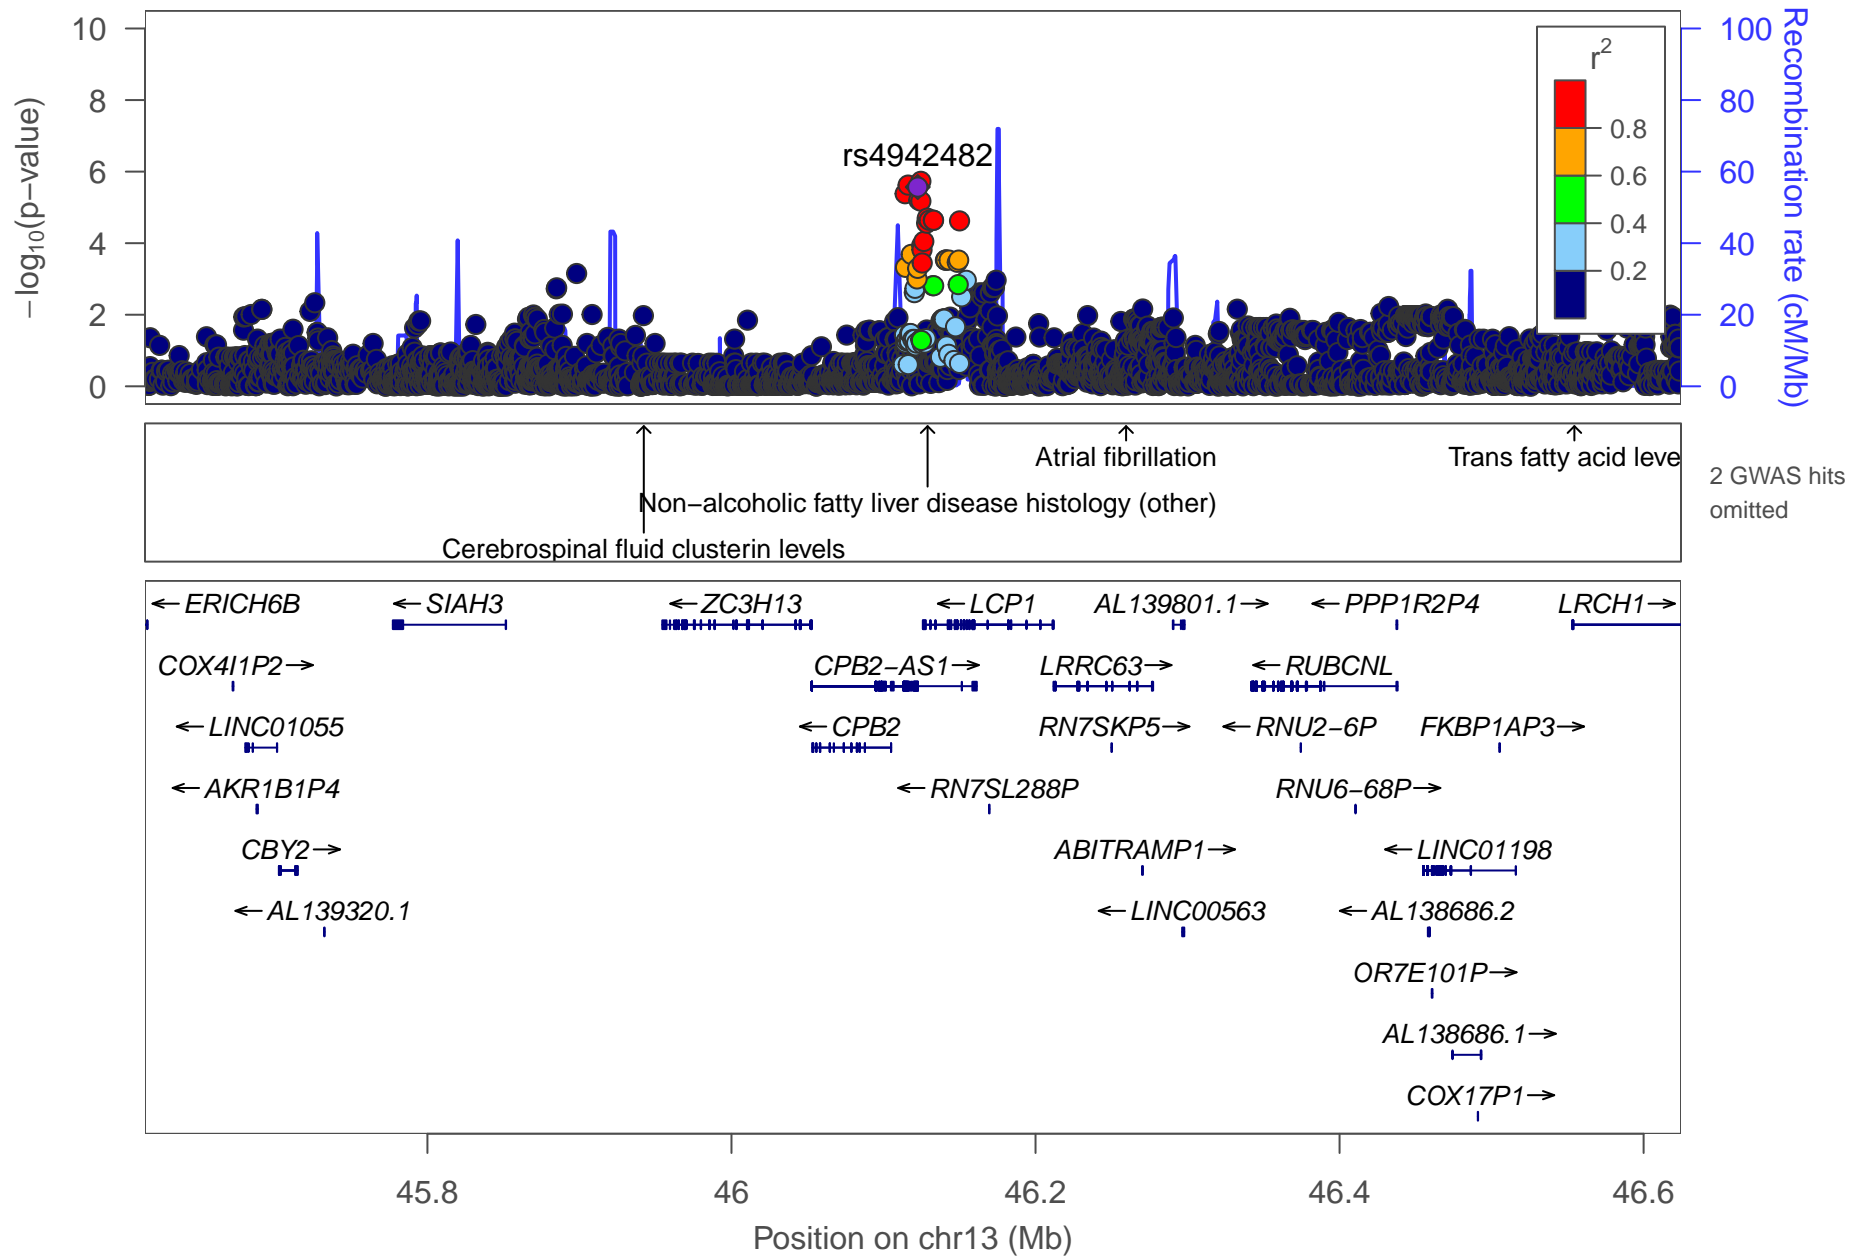

date: Thu Oct 20 22:13:34 2022

build: hg38

display range: chr13:45614229–46624586 [45614229–46624586]

hilite range: 0 – 0 [ 0 – 0 ]

reference SNP: chr13:46122525

number of SNPs plotted: 3276

min P-value: 1.87E–6 [chr13:46124586]

max P-value: 9.99E–1 [chr13:45925981]

omitted GWAS Hits: NA, NA

## GWAS Catalog SNPs in Region

| <b>chr</b> | <b>pos (Mb)</b> | <b>trait</b>                                        | <b>snp</b> |
|------------|-----------------|-----------------------------------------------------|------------|
| 13         | 45.83390        | Pneumococcal bacteremia                             | rs9526114  |
| 13         | 45.94233        | Cerebrospinal fluid clusterin levels                | rs741668   |
| 13         | 46.12901        | Non-alcoholic fatty liver disease histology (other) | rs7324845  |
| 13         | 46.21139        | Systemic lupus erythematosus                        | rs912784   |
| 13         | 46.25958        | Atrial fibrillation                                 | rs958546   |
| 13         | 46.55447        | Trans fatty acid levels                             | rs7325799  |

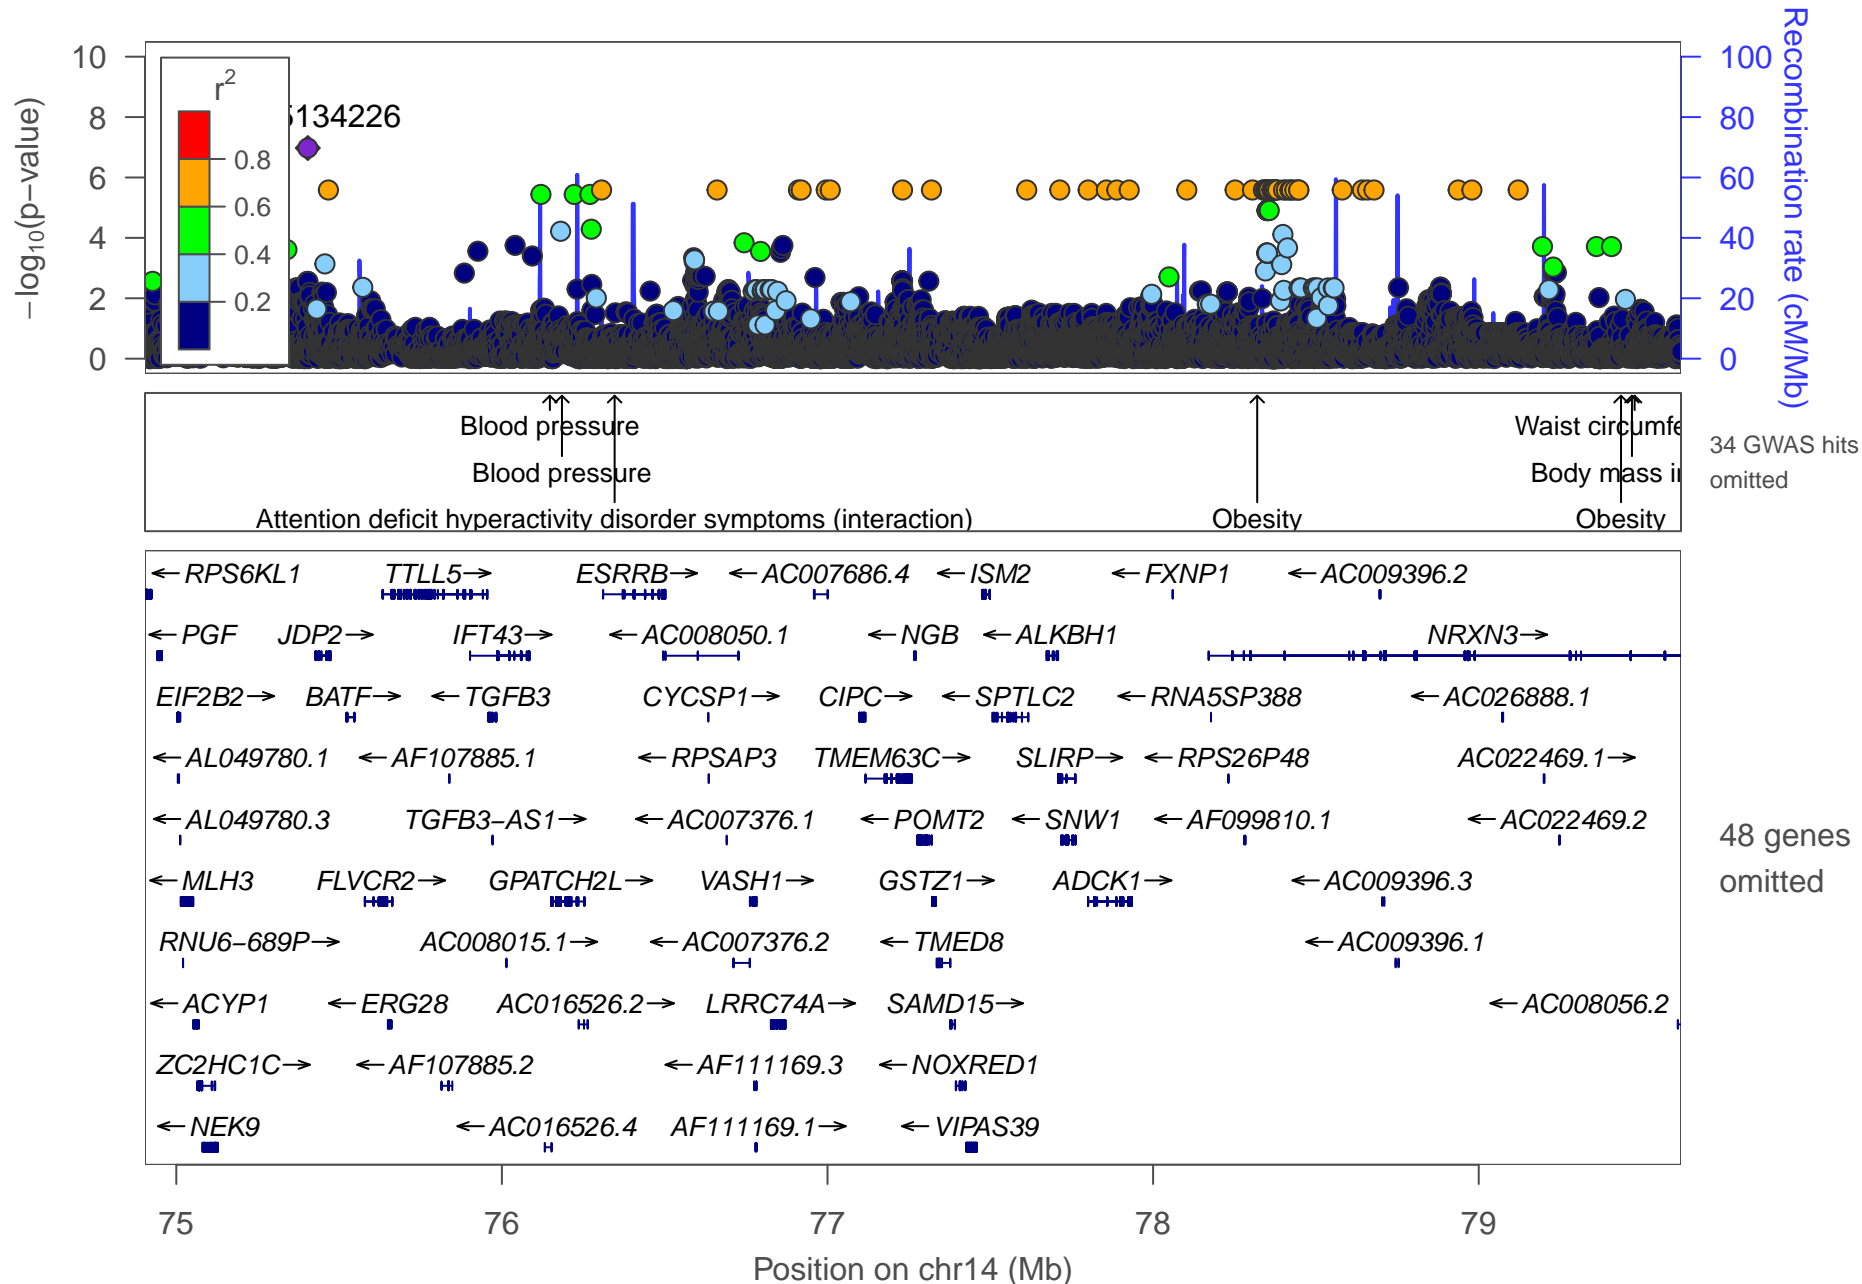



date: Thu Oct 20 22:13:37 2022

build: hg38

display range: chr14:74903852–79621238 [74903852–79621238]

hilite range: 0 – 0 [ 0 – 0 ]

reference SNP: chr14:75403852

number of SNPs plotted: 11574

min P-value: 1.06E–7 [chr14:75403852]

max P-value: 10E–1 [chr14:75900744]

omitted Genes: HIF1AP1, AL049780.2, TMED10

omitted Genes: AL691403.2, RNU4ATAC14P, AL691403.1

omitted Genes: AF111167.1, AF111167.3, FOS

omitted Genes: DPPA5P4, LINC01220, AF111167.2

omitted Genes: AC007182.1, AC007182.2, RNA5SP387

omitted Genes: AC007182.3, AC016526.3, AC016526.1

omitted Genes: VASH1–AS1, ANGEL1, AF111169.4

omitted Genes: RPL22P2, RN7SKP17, AF111169.2

omitted Genes: LINC01629, RN7SL356P, AC007686.1

omitted Genes: IRF2BPL, AC007686.3, LINC02288

omitted Genes: AC007686.2, LINC02289, AC007686.5

omitted Genes: AC007375.2, ZDHHC22, AC007375.3

omitted Genes: FAM204DP, AC007375.1, MIR1260A

omitted Genes: AC007954.1, AHSA1, AF111168.1

omitted Genes: RN7SL587P, COX6CP11, RPL21P10

Make more plots at <http://csg.sph.umich.edu/locuszoom/>

GWAS Catalog SNPs in Region

| chr | pos (Mb) | trait                                                                         | snp        |
|-----|----------|-------------------------------------------------------------------------------|------------|
| 14  | 75.15934 | Height                                                                        | rs910316   |
| 14  | 75.23452 | Inflammatory bowel disease                                                    | rs4899554  |
| 14  | 75.27505 | Crohn's disease                                                               | rs1569328  |
| 14  | 75.27505 | Inflammatory bowel disease                                                    | rs1569328  |
| 14  | 75.34732 | Periodontal microbiota                                                        | rs11621969 |
| 14  | 75.44976 | Obesity-related traits                                                        | rs84044    |
| 14  | 75.49419 | Rheumatoid arthritis                                                          | rs7155603  |
| 14  | 75.53921 | Multiple sclerosis                                                            | rs2300603  |
| 14  | 75.66325 | Height                                                                        | rs724743   |
| 14  | 75.70752 | Large artery stroke                                                           | rs1005224  |
| 14  | 76.03396 | Acute urticaria and angioedema (non-steroidal anti-inflammatory drug-induced) | rs9323624  |
| 14  | 76.14733 | Blood pressure                                                                | rs935334   |
| 14  | 76.18442 | Blood pressure                                                                | rs2121070  |
| 14  | 76.23701 | Acute lymphoblastic leukemia (childhood)                                      | rs7156960  |
| 14  | 76.34615 | Attention deficit hyperactivity disorder symptoms (interaction)               | rs2360997  |
| 14  | 76.34635 | Maximal oxygen uptake response                                                | rs12893597 |
| 14  | 77.03163 | Adverse response to lamotrigine and phenytoin                                 | rs183266   |
| 14  | 77.04750 | Sleep quality                                                                 | rs1986116  |
| 14  | 77.13548 | Large artery stroke                                                           | rs1465330  |
| 14  | 77.21833 | Bipolar disorder                                                              | rs4467006  |
| 14  | 77.21850 | Bipolar disorder                                                              | rs2287375  |

GWAS Catalog SNPs in Region

| chr | pos (Mb) | trait                                                                                            | snp        |
|-----|----------|--------------------------------------------------------------------------------------------------|------------|
| 14  | 77.23762 | Obsessive–compulsive symptoms                                                                    | rs67366981 |
| 14  | 77.56203 | Gut microbiome composition (winter)                                                              | rs4903604  |
| 14  | 77.91334 | Resting heart rate                                                                               | rs1549118  |
| 14  | 77.95471 | Response to anti–retroviral therapy (ddl/d4T) in HIV–1 infection (Grade 1 peripheral neuropathy) | rs4899685  |
| 14  | 78.06856 | Response to platinum–based chemotherapy in non–small–cell lung cancer                            | rs3850370  |
| 14  | 78.09012 | Objective response to lithium treatment in bipolar disorder                                      | rs809      |
| 14  | 78.22872 | Electrodermal activity                                                                           | rs10129666 |
| 14  | 78.28464 | Electrodermal activity                                                                           | rs11159346 |
| 14  | 78.30896 | Brain structure (temporal lobe volume)                                                           | rs7155434  |
| 14  | 78.31973 | Obesity                                                                                          | rs11624704 |
| 14  | 78.31973 | Coronary artery aneurysm in Kawasaki disease                                                     | rs11624704 |
| 14  | 78.31982 | Cognitive performance                                                                            | rs6574433  |
| 14  | 78.74307 | Body mass index                                                                                  | rs17835706 |
| 14  | 79.38089 | Underweight status                                                                               | rs12882679 |
| 14  | 79.43311 | Obesity                                                                                          | rs7141420  |
| 14  | 79.43311 | Body mass index                                                                                  | rs7141420  |
| 14  | 79.43703 | Obesity                                                                                          | rs2370983  |
| 14  | 79.47062 | Body mass index                                                                                  | rs10150332 |
| 14  | 79.47882 | Waist circumference                                                                              | rs10146997 |
| 14  | 79.53575 | Amyotrophic lateral sclerosis (age of onset)                                                     | rs7147705  |

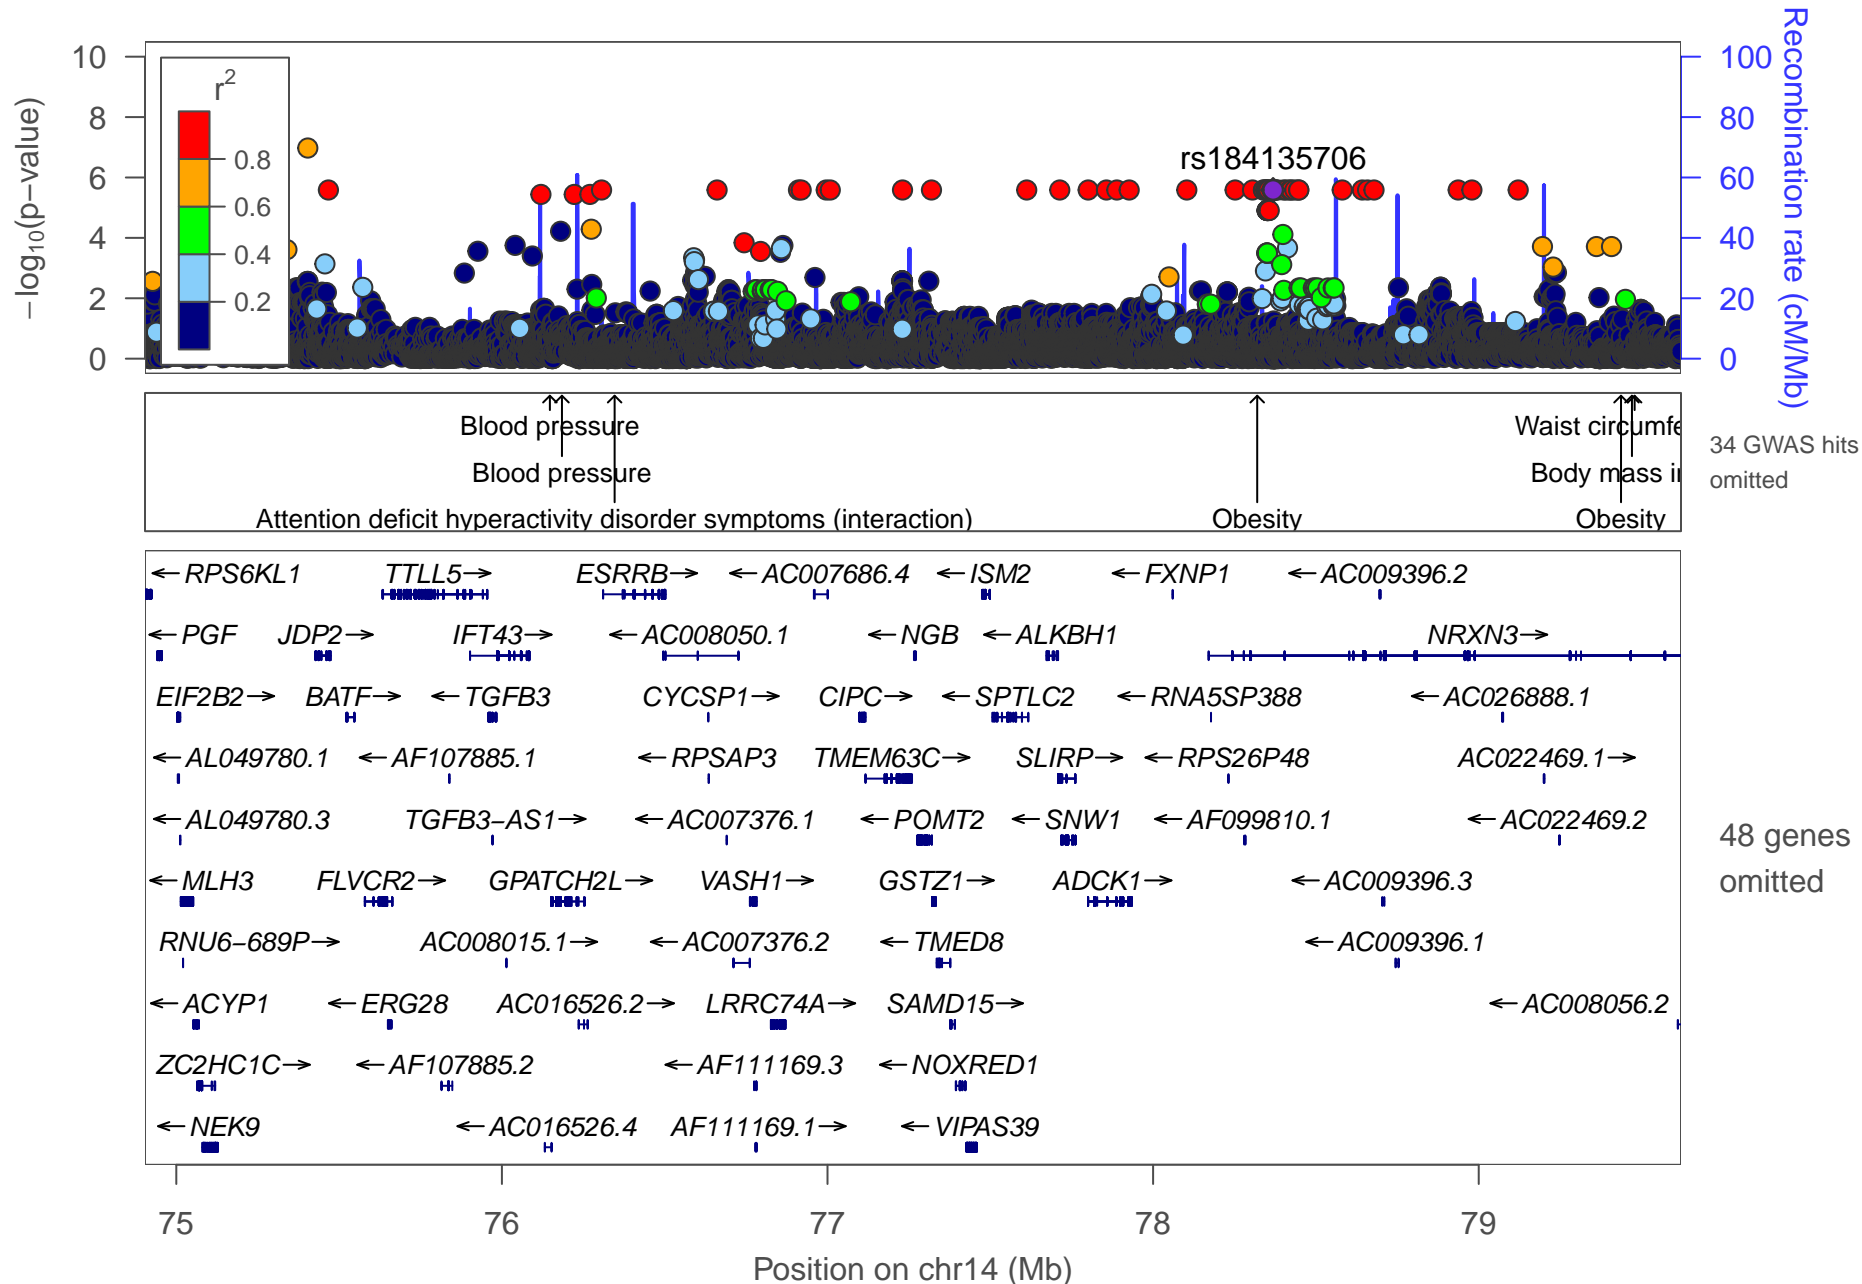

date: Thu Oct 20 22:13:37 2022

build: hg38

display range: chr14:74903852–79621238 [74903852–79621238]

hilite range: 0 – 0 [ 0 – 0 ]

reference SNP: chr14:78368545

number of SNPs plotted: 11574

min P-value: 1.06E–7 [chr14:75403852]

max P-value: 10E–1 [chr14:75900744]

omitted Genes: HIF1AP1, AL049780.2, TMED10

omitted Genes: AL691403.2, RNU4ATAC14P, AL691403.1

omitted Genes: AF111167.1, AF111167.3, FOS

omitted Genes: DPPA5P4, LINC01220, AF111167.2

omitted Genes: AC007182.1, AC007182.2, RNA5SP387

omitted Genes: AC007182.3, AC016526.3, AC016526.1

omitted Genes: VASH1–AS1, ANGEL1, AF111169.4

omitted Genes: RPL22P2, RN7SKP17, AF111169.2

omitted Genes: LINC01629, RN7SL356P, AC007686.1

omitted Genes: IRF2BPL, AC007686.3, LINC02288

omitted Genes: AC007686.2, LINC02289, AC007686.5

omitted Genes: AC007375.2, ZDHHC22, AC007375.3

omitted Genes: FAM204DP, AC007375.1, MIR1260A

omitted Genes: AC007954.1, AHSA1, AF111168.1

omitted Genes: RN7SL587P, COX6CP11, RPL21P10

Make more plots at <http://csg.sph.umich.edu/locuszoom/>

GWAS Catalog SNPs in Region

| chr | pos (Mb) | trait                                                                         | snp        |
|-----|----------|-------------------------------------------------------------------------------|------------|
| 14  | 75.15934 | Height                                                                        | rs910316   |
| 14  | 75.23452 | Inflammatory bowel disease                                                    | rs4899554  |
| 14  | 75.27505 | Crohn's disease                                                               | rs1569328  |
| 14  | 75.27505 | Inflammatory bowel disease                                                    | rs1569328  |
| 14  | 75.34732 | Periodontal microbiota                                                        | rs11621969 |
| 14  | 75.44976 | Obesity-related traits                                                        | rs84044    |
| 14  | 75.49419 | Rheumatoid arthritis                                                          | rs7155603  |
| 14  | 75.53921 | Multiple sclerosis                                                            | rs2300603  |
| 14  | 75.66325 | Height                                                                        | rs724743   |
| 14  | 75.70752 | Large artery stroke                                                           | rs1005224  |
| 14  | 76.03396 | Acute urticaria and angioedema (non-steroidal anti-inflammatory drug-induced) | rs9323624  |
| 14  | 76.14733 | Blood pressure                                                                | rs935334   |
| 14  | 76.18442 | Blood pressure                                                                | rs2121070  |
| 14  | 76.23701 | Acute lymphoblastic leukemia (childhood)                                      | rs7156960  |
| 14  | 76.34615 | Attention deficit hyperactivity disorder symptoms (interaction)               | rs2360997  |
| 14  | 76.34635 | Maximal oxygen uptake response                                                | rs12893597 |
| 14  | 77.03163 | Adverse response to lamotrigine and phenytoin                                 | rs183266   |
| 14  | 77.04750 | Sleep quality                                                                 | rs1986116  |
| 14  | 77.13548 | Large artery stroke                                                           | rs1465330  |
| 14  | 77.21833 | Bipolar disorder                                                              | rs4467006  |
| 14  | 77.21850 | Bipolar disorder                                                              | rs2287375  |

GWAS Catalog SNPs in Region

| chr | pos (Mb) | trait                                                                                            | snp        |
|-----|----------|--------------------------------------------------------------------------------------------------|------------|
| 14  | 77.23762 | Obsessive–compulsive symptoms                                                                    | rs67366981 |
| 14  | 77.56203 | Gut microbiome composition (winter)                                                              | rs4903604  |
| 14  | 77.91334 | Resting heart rate                                                                               | rs1549118  |
| 14  | 77.95471 | Response to anti–retroviral therapy (ddl/d4T) in HIV–1 infection (Grade 1 peripheral neuropathy) | rs4899685  |
| 14  | 78.06856 | Response to platinum–based chemotherapy in non–small–cell lung cancer                            | rs3850370  |
| 14  | 78.09012 | Objective response to lithium treatment in bipolar disorder                                      | rs809      |
| 14  | 78.22872 | Electrodermal activity                                                                           | rs10129666 |
| 14  | 78.28464 | Electrodermal activity                                                                           | rs11159346 |
| 14  | 78.30896 | Brain structure (temporal lobe volume)                                                           | rs7155434  |
| 14  | 78.31973 | Obesity                                                                                          | rs11624704 |
| 14  | 78.31973 | Coronary artery aneurysm in Kawasaki disease                                                     | rs11624704 |
| 14  | 78.31982 | Cognitive performance                                                                            | rs6574433  |
| 14  | 78.74307 | Body mass index                                                                                  | rs17835706 |
| 14  | 79.38089 | Underweight status                                                                               | rs12882679 |
| 14  | 79.43311 | Obesity                                                                                          | rs7141420  |
| 14  | 79.43311 | Body mass index                                                                                  | rs7141420  |
| 14  | 79.43703 | Obesity                                                                                          | rs2370983  |
| 14  | 79.47062 | Body mass index                                                                                  | rs10150332 |
| 14  | 79.47882 | Waist circumference                                                                              | rs10146997 |
| 14  | 79.53575 | Amyotrophic lateral sclerosis (age of onset)                                                     | rs7147705  |

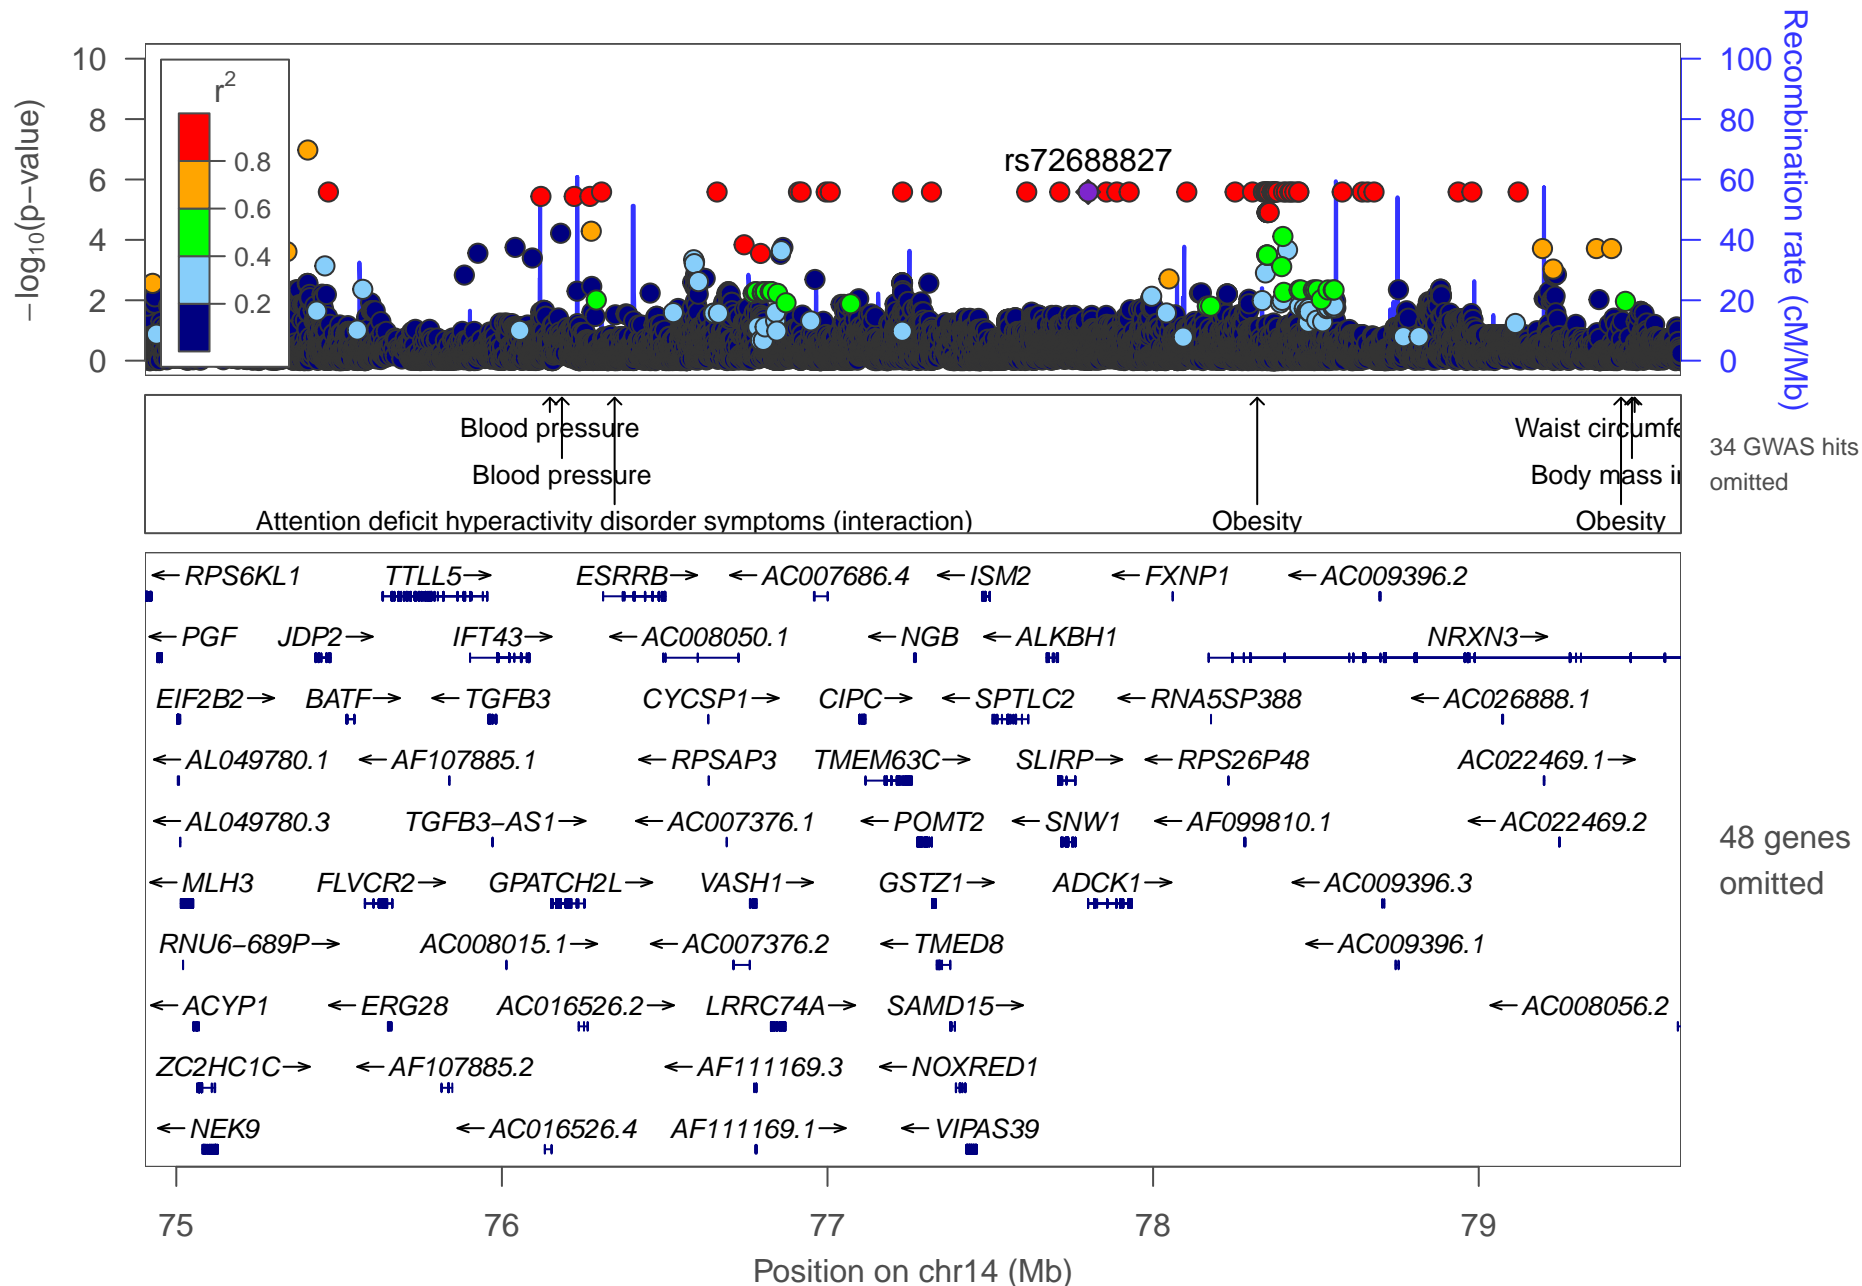



date: Thu Oct 20 22:13:37 2022

build: hg38

display range: chr14:74903852–79621238 [74903852–79621238]

hilite range: 0 – 0 [ 0 – 0 ]

reference SNP: chr14:77800506

number of SNPs plotted: 11574

min P-value: 1.06E–7 [chr14:75403852]

max P-value: 10E–1 [chr14:75900744]

omitted Genes: HIF1AP1, AL049780.2, TMED10

omitted Genes: AL691403.2, RNU4ATAC14P, AL691403.1

omitted Genes: AF111167.1, AF111167.3, FOS

omitted Genes: DPPA5P4, LINC01220, AF111167.2

omitted Genes: AC007182.1, AC007182.2, RNA5SP387

omitted Genes: AC007182.3, AC016526.3, AC016526.1

omitted Genes: VASH1–AS1, ANGEL1, AF111169.4

omitted Genes: RPL22P2, RN7SKP17, AF111169.2

omitted Genes: LINC01629, RN7SL356P, AC007686.1

omitted Genes: IRF2BPL, AC007686.3, LINC02288

omitted Genes: AC007686.2, LINC02289, AC007686.5

omitted Genes: AC007375.2, ZDHHC22, AC007375.3

omitted Genes: FAM204DP, AC007375.1, MIR1260A

omitted Genes: AC007954.1, AHSA1, AF111168.1

omitted Genes: RN7SL587P, COX6CP11, RPL21P10

Make more plots at <http://csg.sph.umich.edu/locuszoom/>

GWAS Catalog SNPs in Region

| chr | pos (Mb) | trait                                                                         | snp        |
|-----|----------|-------------------------------------------------------------------------------|------------|
| 14  | 75.15934 | Height                                                                        | rs910316   |
| 14  | 75.23452 | Inflammatory bowel disease                                                    | rs4899554  |
| 14  | 75.27505 | Crohn's disease                                                               | rs1569328  |
| 14  | 75.27505 | Inflammatory bowel disease                                                    | rs1569328  |
| 14  | 75.34732 | Periodontal microbiota                                                        | rs11621969 |
| 14  | 75.44976 | Obesity-related traits                                                        | rs84044    |
| 14  | 75.49419 | Rheumatoid arthritis                                                          | rs7155603  |
| 14  | 75.53921 | Multiple sclerosis                                                            | rs2300603  |
| 14  | 75.66325 | Height                                                                        | rs724743   |
| 14  | 75.70752 | Large artery stroke                                                           | rs1005224  |
| 14  | 76.03396 | Acute urticaria and angioedema (non-steroidal anti-inflammatory drug-induced) | rs9323624  |
| 14  | 76.14733 | Blood pressure                                                                | rs935334   |
| 14  | 76.18442 | Blood pressure                                                                | rs2121070  |
| 14  | 76.23701 | Acute lymphoblastic leukemia (childhood)                                      | rs7156960  |
| 14  | 76.34615 | Attention deficit hyperactivity disorder symptoms (interaction)               | rs2360997  |
| 14  | 76.34635 | Maximal oxygen uptake response                                                | rs12893597 |
| 14  | 77.03163 | Adverse response to lamotrigine and phenytoin                                 | rs183266   |
| 14  | 77.04750 | Sleep quality                                                                 | rs1986116  |
| 14  | 77.13548 | Large artery stroke                                                           | rs1465330  |
| 14  | 77.21833 | Bipolar disorder                                                              | rs4467006  |
| 14  | 77.21850 | Bipolar disorder                                                              | rs2287375  |

GWAS Catalog SNPs in Region

| chr | pos (Mb) | trait                                                                                            | snp        |
|-----|----------|--------------------------------------------------------------------------------------------------|------------|
| 14  | 77.23762 | Obsessive–compulsive symptoms                                                                    | rs67366981 |
| 14  | 77.56203 | Gut microbiome composition (winter)                                                              | rs4903604  |
| 14  | 77.91334 | Resting heart rate                                                                               | rs1549118  |
| 14  | 77.95471 | Response to anti–retroviral therapy (ddl/d4T) in HIV–1 infection (Grade 1 peripheral neuropathy) | rs4899685  |
| 14  | 78.06856 | Response to platinum–based chemotherapy in non–small–cell lung cancer                            | rs3850370  |
| 14  | 78.09012 | Objective response to lithium treatment in bipolar disorder                                      | rs809      |
| 14  | 78.22872 | Electrodermal activity                                                                           | rs10129666 |
| 14  | 78.28464 | Electrodermal activity                                                                           | rs11159346 |
| 14  | 78.30896 | Brain structure (temporal lobe volume)                                                           | rs7155434  |
| 14  | 78.31973 | Obesity                                                                                          | rs11624704 |
| 14  | 78.31973 | Coronary artery aneurysm in Kawasaki disease                                                     | rs11624704 |
| 14  | 78.31982 | Cognitive performance                                                                            | rs6574433  |
| 14  | 78.74307 | Body mass index                                                                                  | rs17835706 |
| 14  | 79.38089 | Underweight status                                                                               | rs12882679 |
| 14  | 79.43311 | Obesity                                                                                          | rs7141420  |
| 14  | 79.43311 | Body mass index                                                                                  | rs7141420  |
| 14  | 79.43703 | Obesity                                                                                          | rs2370983  |
| 14  | 79.47062 | Body mass index                                                                                  | rs10150332 |
| 14  | 79.47882 | Waist circumference                                                                              | rs10146997 |
| 14  | 79.53575 | Amyotrophic lateral sclerosis (age of onset)                                                     | rs7147705  |

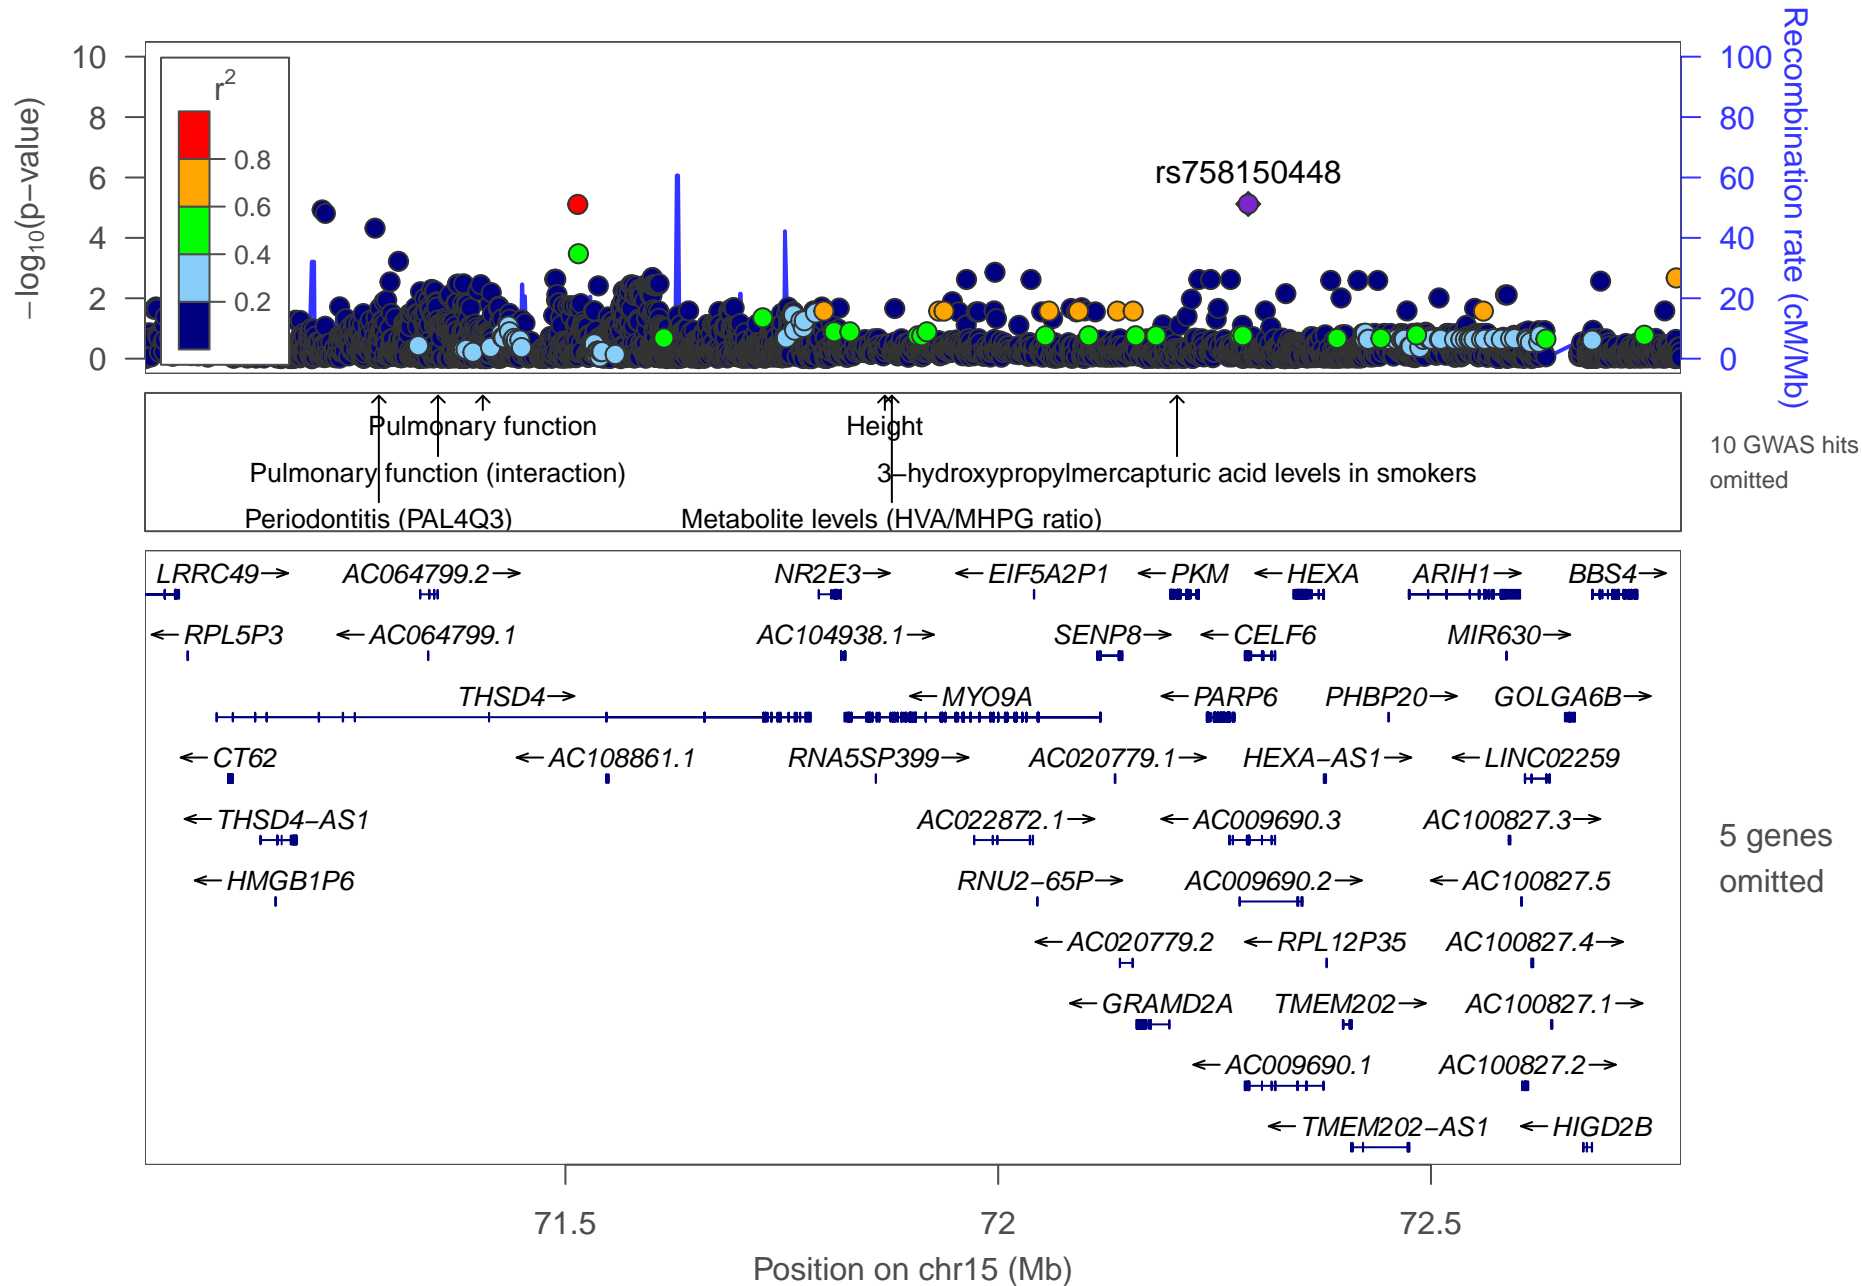

date: Thu Oct 20 22:13:34 2022

build: hg38

display range: chr15:71014241–72788879 [71014241–72788879]

hilite range: 0 – 0 [ 0 – 0 ]

reference SNP: chr15:72288879

number of SNPs plotted: 3914

min P-value: 7.55E–6 [chr15:72288879]

max P-value: 9.99E–1 [chr15:72330977]

omitted Genes: AC079322.1, RN7SL853P, AC009712.1

omitted Genes: ADPGK, ADPGK–AS1

omitted GWAS Hits: chr15:71.869062–Height, chr15:72.206596–3–hydroxypropylmercapturic acid levels in smokers

omitted GWAS Hits: NA, NA

omitted GWAS Hits: NA, NA

omitted GWAS Hits: NA

GWAS Catalog SNPs in Region

| chr | pos (Mb) | trait                                                               | snp         |
|-----|----------|---------------------------------------------------------------------|-------------|
| 15  | 71.13167 | Thiazide-induced adverse metabolic effects in hypertensive patients | rs12904863  |
| 15  | 71.28061 | Symmetrical dimethylarginine levels                                 | rs76917273  |
| 15  | 71.28246 | Periodontitis (PAL4Q3)                                              | rs9806183   |
| 15  | 71.28442 | Periodontitis (PAL4Q3)                                              | rs1442779   |
| 15  | 71.28442 | Periodontitis (Mean PAL)                                            | rs1442779   |
| 15  | 71.31628 | Antibody status in <i>Tripanosoma cruzi</i> seropositivity          | rs17786786  |
| 15  | 71.35278 | Pulmonary function (interaction)                                    | rs12899618  |
| 15  | 71.35278 | Pulmonary function                                                  | rs12899618  |
| 15  | 71.38762 | Airflow obstruction                                                 | rs2044029   |
| 15  | 71.40455 | Pulmonary function                                                  | rs12441227  |
| 15  | 71.44975 | Alzheimer disease and age of onset                                  | rs142200609 |
| 15  | 71.81483 | 3-hydroxypropylmercapturic acid levels in smokers                   | rs113441626 |
| 15  | 71.86906 | Height                                                              | rs12902421  |
| 15  | 71.87713 | Metabolite levels (HVA/MHPG ratio)                                  | rs12050794  |
| 15  | 72.20660 | 3-hydroxypropylmercapturic acid levels in smokers                   | rs113920924 |
| 15  | 72.51906 | Posterior cortical atrophy and Alzheimer's disease                  | rs8038734   |

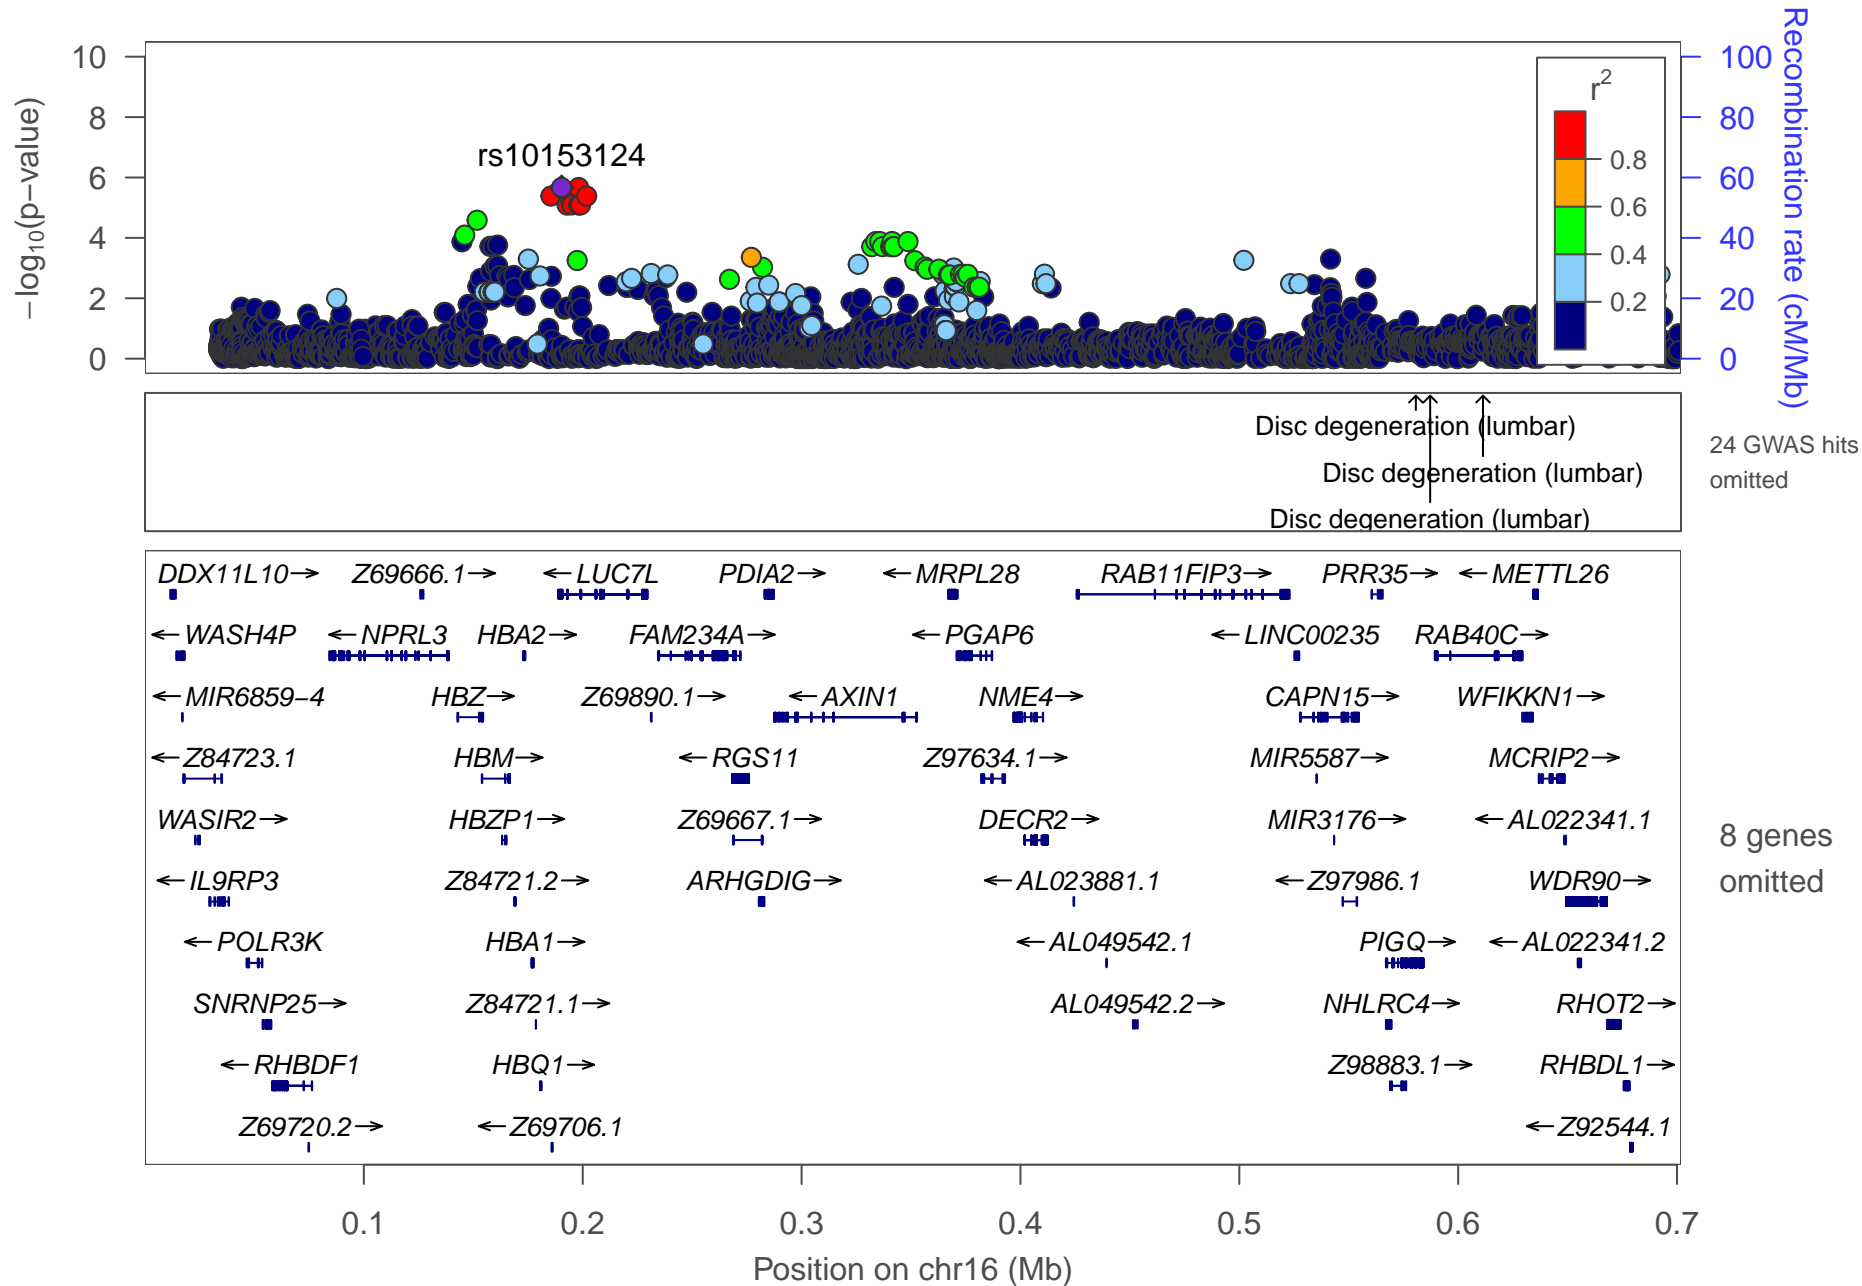

date: Thu Oct 20 22:13:35 2022

build: hg38

display range: chr16:1–701813 [1–701813]

hilite range: 0 – 0 [ 0 – 0 ]

reference SNP: chr16:190339

number of SNPs plotted: 2385

min P-value: 2.15E–6 [chr16:190339]

max P-value: 10E–1 [chr16:347820]

omitted Genes: MPG, Z69720.1, Z92544.3

omitted Genes: STUB1, JMJD8, WDR24

omitted Genes: Z92544.2, FBXL16

omitted GWAS Hits: NA, NA



GWAS Catalog SNPs in Region

| chr | pos (Mb) | trait                                     | snp         |
|-----|----------|-------------------------------------------|-------------|
| 16  | 0.099541 | Hemoglobin levels                         | rs570013781 |
| 16  | 0.113599 | Red blood cell traits                     | rs11248850  |
| 16  | 0.134391 | Hematology traits                         | rs7203560   |
| 16  | 0.134391 | Mean corpuscular volume                   | rs7203560   |
| 16  | 0.134391 | Mean corpuscular hemoglobin concentration | rs7203560   |
| 16  | 0.134391 | Mean corpuscular hemoglobin               | rs7203560   |
| 16  | 0.134391 | Sickle cell anemia (haemolysis)           | rs7203560   |
| 16  | 0.175654 | Mean corpuscular hemoglobin               | rs2858942   |
| 16  | 0.190281 | Hematology traits                         | rs1211375   |
| 16  | 0.190281 | Mean corpuscular volume                   | rs1211375   |
| 16  | 0.190281 | Mean corpuscular hemoglobin               | rs1211375   |
| 16  | 0.248589 | Red blood cell traits                     | rs13339636  |
| 16  | 0.254804 | Mean corpuscular volume                   | rs7189020   |
| 16  | 0.259156 | Mean corpuscular hemoglobin               | rs1122794   |
| 16  | 0.259156 | Red blood cell traits                     | rs1122794   |
| 16  | 0.260381 | Red blood cell traits                     | rs13335629  |
| 16  | 0.264781 | Red blood cell traits                     | rs9924561   |
| 16  | 0.284580 | Morning vs. evening chronotype            | rs432925    |
| 16  | 0.297063 | Bone mineral density (spine)              | rs117208012 |
| 16  | 0.325782 | Bone mineral density                      | rs9921222   |
| 16  | 0.325782 | Bone mineral density (spine)              | rs9921222   |

## GWAS Catalog SNPs in Region

| <b>chr</b> | <b>pos (Mb)</b> | <b>trait</b>                              | <b>snp</b> |
|------------|-----------------|-------------------------------------------|------------|
| 16         | 0.337867        | Body mass index                           | rs11866815 |
| 16         | 0.530124        | Mean corpuscular hemoglobin concentration | rs2266928  |
| 16         | 0.580665        | Disc degeneration (lumbar)                | rs1981483  |
| 16         | 0.587212        | Disc degeneration (lumbar)                | rs2017567  |
| 16         | 0.611335        | Disc degeneration (lumbar)                | rs7204439  |
| 16         | 0.625680        | Height                                    | rs763014   |

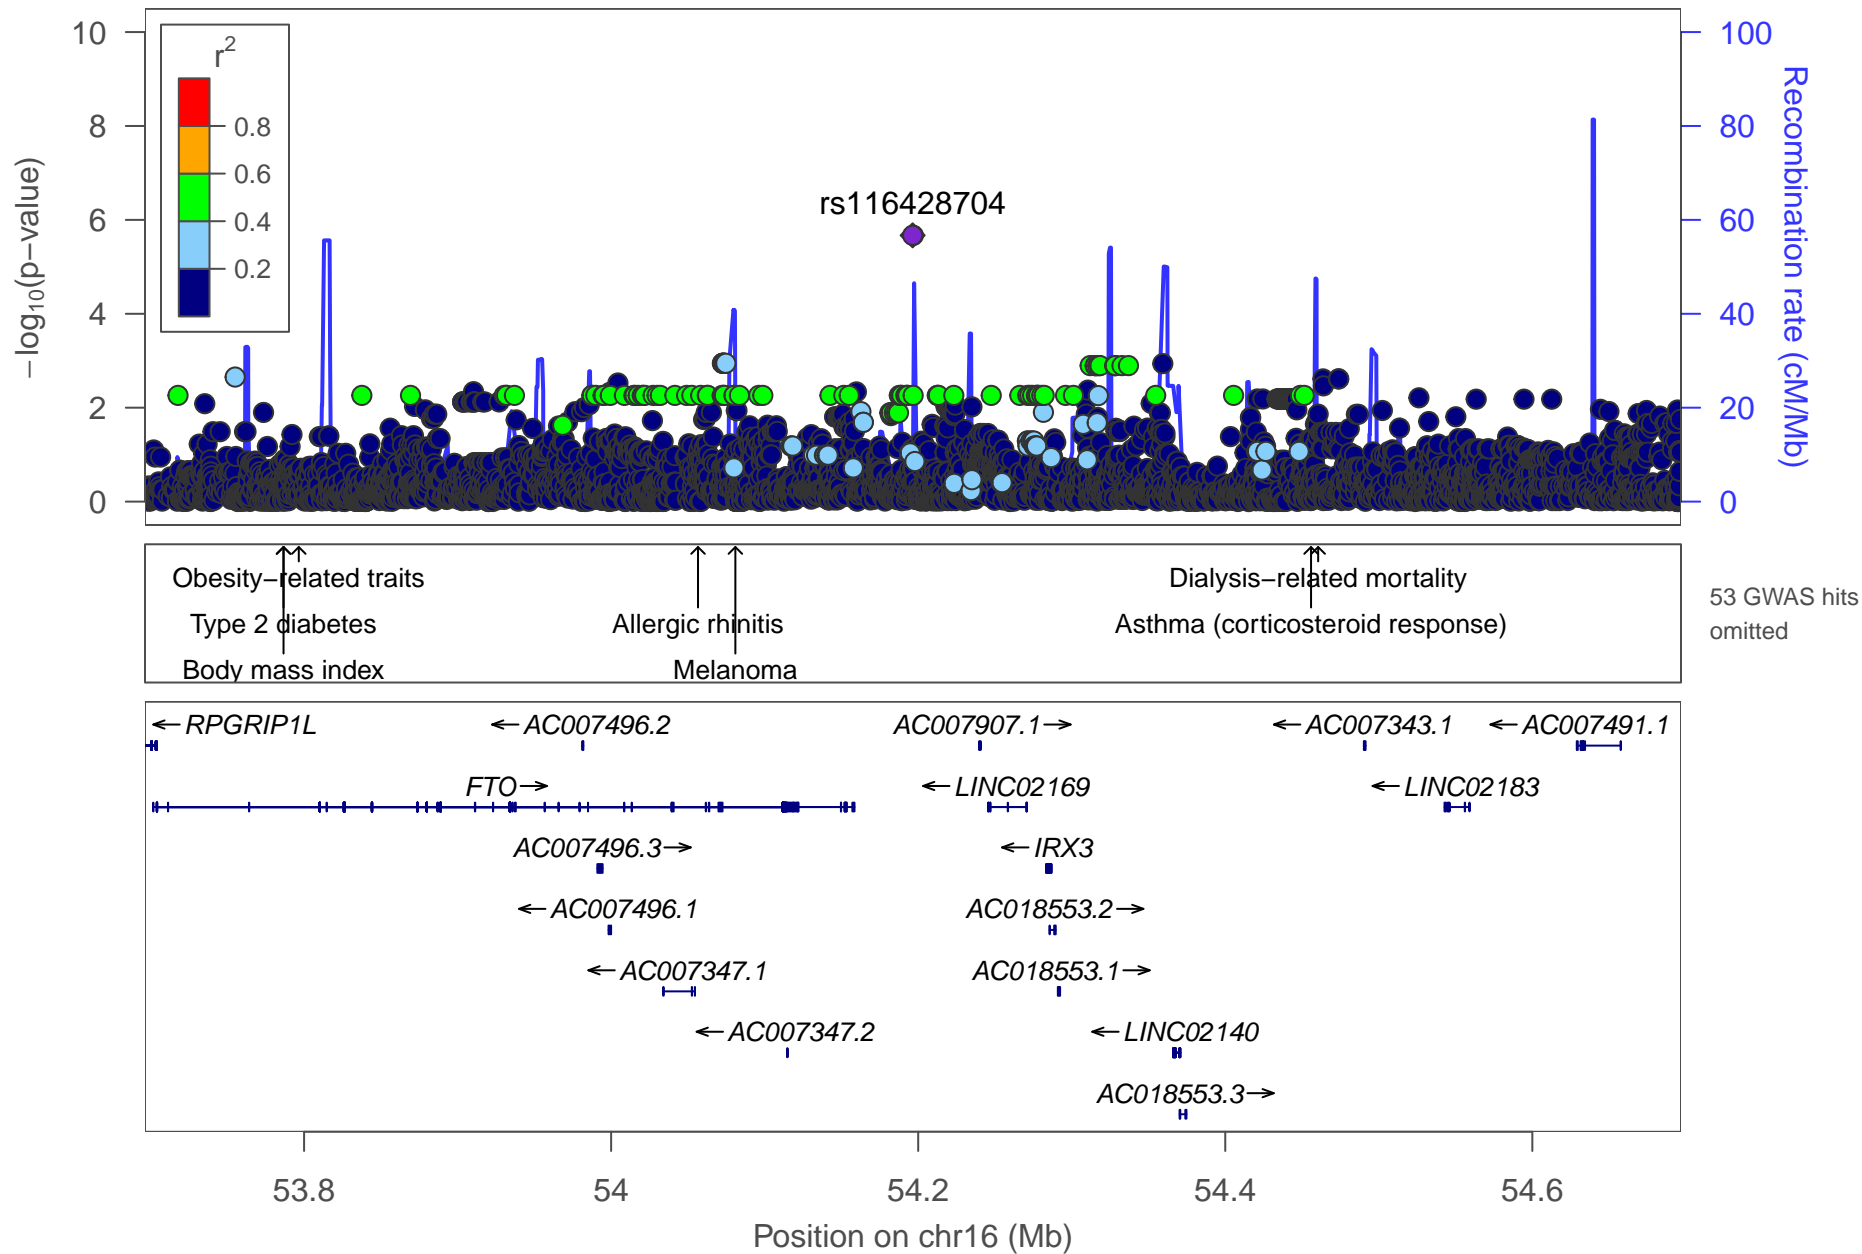

date: Thu Oct 20 22:13:35 2022

build: hg38

display range: chr16:53696382–54696839 [53696382–54696839]

hilite range: 0 – 0 [ 0 – 0 ]

reference SNP: chr16:54196382

number of SNPs plotted: 4154

min P-value: 2.13E–6 [chr16:54196382]

max P-value: 9.99E–1 [chr16:54415261]

omitted GWAS Hits: chr16:54.460512–Dialysis–related mortality, chr16:54.056583–Allergic rhinitis

omitted GWAS Hits: chr16:54.080912–Melanoma, NA

omitted GWAS Hits: NA, NA

Make more plots at <http://csg.sph.umich.edu/locuszoom/>

omitted GWAS Hits: NA, NA

GWAS Catalog SNPs in Region

| chr | pos (Mb) | trait                                                            | snp       |
|-----|----------|------------------------------------------------------------------|-----------|
| 16  | 53.72383 | Subcutaneous adipose tissue                                      | rs1421084 |
| 16  | 53.73577 | Body mass index                                                  | rs6499640 |
| 16  | 53.73577 | Weight                                                           | rs6499640 |
| 16  | 53.76684 | Metabolic syndrome                                               | rs9940128 |
| 16  | 53.76684 | Body mass index                                                  | rs9940128 |
| 16  | 53.76704 | Dietary macronutrient intake                                     | rs1421085 |
| 16  | 53.76704 | Obesity                                                          | rs1421085 |
| 16  | 53.76704 | Obesity (early onset extreme)                                    | rs1421085 |
| 16  | 53.76704 | Childhood body mass index                                        | rs1421085 |
| 16  | 53.76704 | Type 2 diabetes                                                  | rs1421085 |
| 16  | 53.76966 | Waist circumference                                              | rs1558902 |
| 16  | 53.76966 | Body mass index                                                  | rs1558902 |
| 16  | 53.76966 | Obesity                                                          | rs1558902 |
| 16  | 53.76966 | Height adjusted BMI                                              | rs1558902 |
| 16  | 53.76966 | Obesity (early onset extreme)                                    | rs1558902 |
| 16  | 53.76966 | Body mass index (age interaction)                                | rs1558902 |
| 16  | 53.76966 | Childhood body mass index                                        | rs1558902 |
| 16  | 53.76966 | Body fat percentage                                              | rs1558902 |
| 16  | 53.76966 | C-reactive protein levels or HDL-cholesterol levels (pleiotropy) | rs1558902 |
| 16  | 53.77533 | Body mass index                                                  | rs1121980 |
| 16  | 53.77533 | Obesity (early onset extreme)                                    | rs1121980 |

GWAS Catalog SNPs in Region

| chr | pos (Mb) | trait                                              | snp        |
|-----|----------|----------------------------------------------------|------------|
| 16  | 53.77533 | HDL cholesterol                                    | rs1121980  |
| 16  | 53.77533 | Triglycerides                                      | rs1121980  |
| 16  | 53.77677 | Sasang constitutional medicine type (So–Eum)       | rs7193144  |
| 16  | 53.77788 | Body mass index                                    | rs62033400 |
| 16  | 53.77945 | Obesity                                            | rs17817449 |
| 16  | 53.77945 | Breast cancer                                      | rs17817449 |
| 16  | 53.77945 | Breast cancer (estrogen–receptor negative)         | rs17817449 |
| 16  | 53.77954 | Obesity                                            | rs8043757  |
| 16  | 53.77954 | circulating leptin levels                          | rs8043757  |
| 16  | 53.78236 | Type 2 diabetes                                    | rs8050136  |
| 16  | 53.78236 | Body mass in chronic obstructive pulmonary disease | rs8050136  |
| 16  | 53.78236 | Adiposity                                          | rs8050136  |
| 16  | 53.78236 | Body mass index                                    | rs8050136  |
| 16  | 53.78236 | Menarche (age at onset)                            | rs8050136  |
| 16  | 53.78236 | Weight                                             | rs8050136  |
| 16  | 53.78526 | Type 2 diabetes                                    | rs9936385  |
| 16  | 53.78598 | Body mass index                                    | rs11075990 |
| 16  | 53.78661 | Type 2 diabetes                                    | rs9939609  |
| 16  | 53.78661 | Body mass index                                    | rs9939609  |
| 16  | 53.78661 | Biomedical quantitative traits                     | rs9939609  |
| 16  | 53.78661 | Menarche (age at onset)                            | rs9939609  |

GWAS Catalog SNPs in Region

| chr | pos (Mb) | trait                                                             | snp        |
|-----|----------|-------------------------------------------------------------------|------------|
| 16  | 53.78770 | Body mass index                                                   | rs7202116  |
| 16  | 53.78874 | Obesity                                                           | rs7185735  |
| 16  | 53.79158 | Obesity (extreme)                                                 | rs9941349  |
| 16  | 53.79415 | Body mass index                                                   | rs17817964 |
| 16  | 53.79655 | Obesity-related traits                                            | rs9930506  |
| 16  | 53.79786 | Subcutaneous adipose tissue                                       | rs9922619  |
| 16  | 53.80522 | Osteoarthritis                                                    | rs8044769  |
| 16  | 53.80900 | Body mass index                                                   | rs12149832 |
| 16  | 53.81157 | Type 2 diabetes                                                   | rs11642841 |
| 16  | 53.82138 | Breast cancer                                                     | rs11075995 |
| 16  | 53.82138 | Breast cancer (estrogen-receptor negative)                        | rs11075995 |
| 16  | 53.82614 | Response to thiopurine in inflammatory bowel disease (leukopenia) | rs79206939 |
| 16  | 53.85383 | Eyebrow thickness                                                 | rs12597422 |
| 16  | 53.99406 | Sex hormone-binding globulin levels                               | rs12596210 |
| 16  | 54.05658 | Allergic rhinitis                                                 | rs7187423  |
| 16  | 54.08091 | Melanoma                                                          | rs16953002 |
| 16  | 54.45588 | Asthma (corticosteroid response)                                  | rs2388639  |
| 16  | 54.46051 | Dialysis-related mortality                                        | rs9921518  |

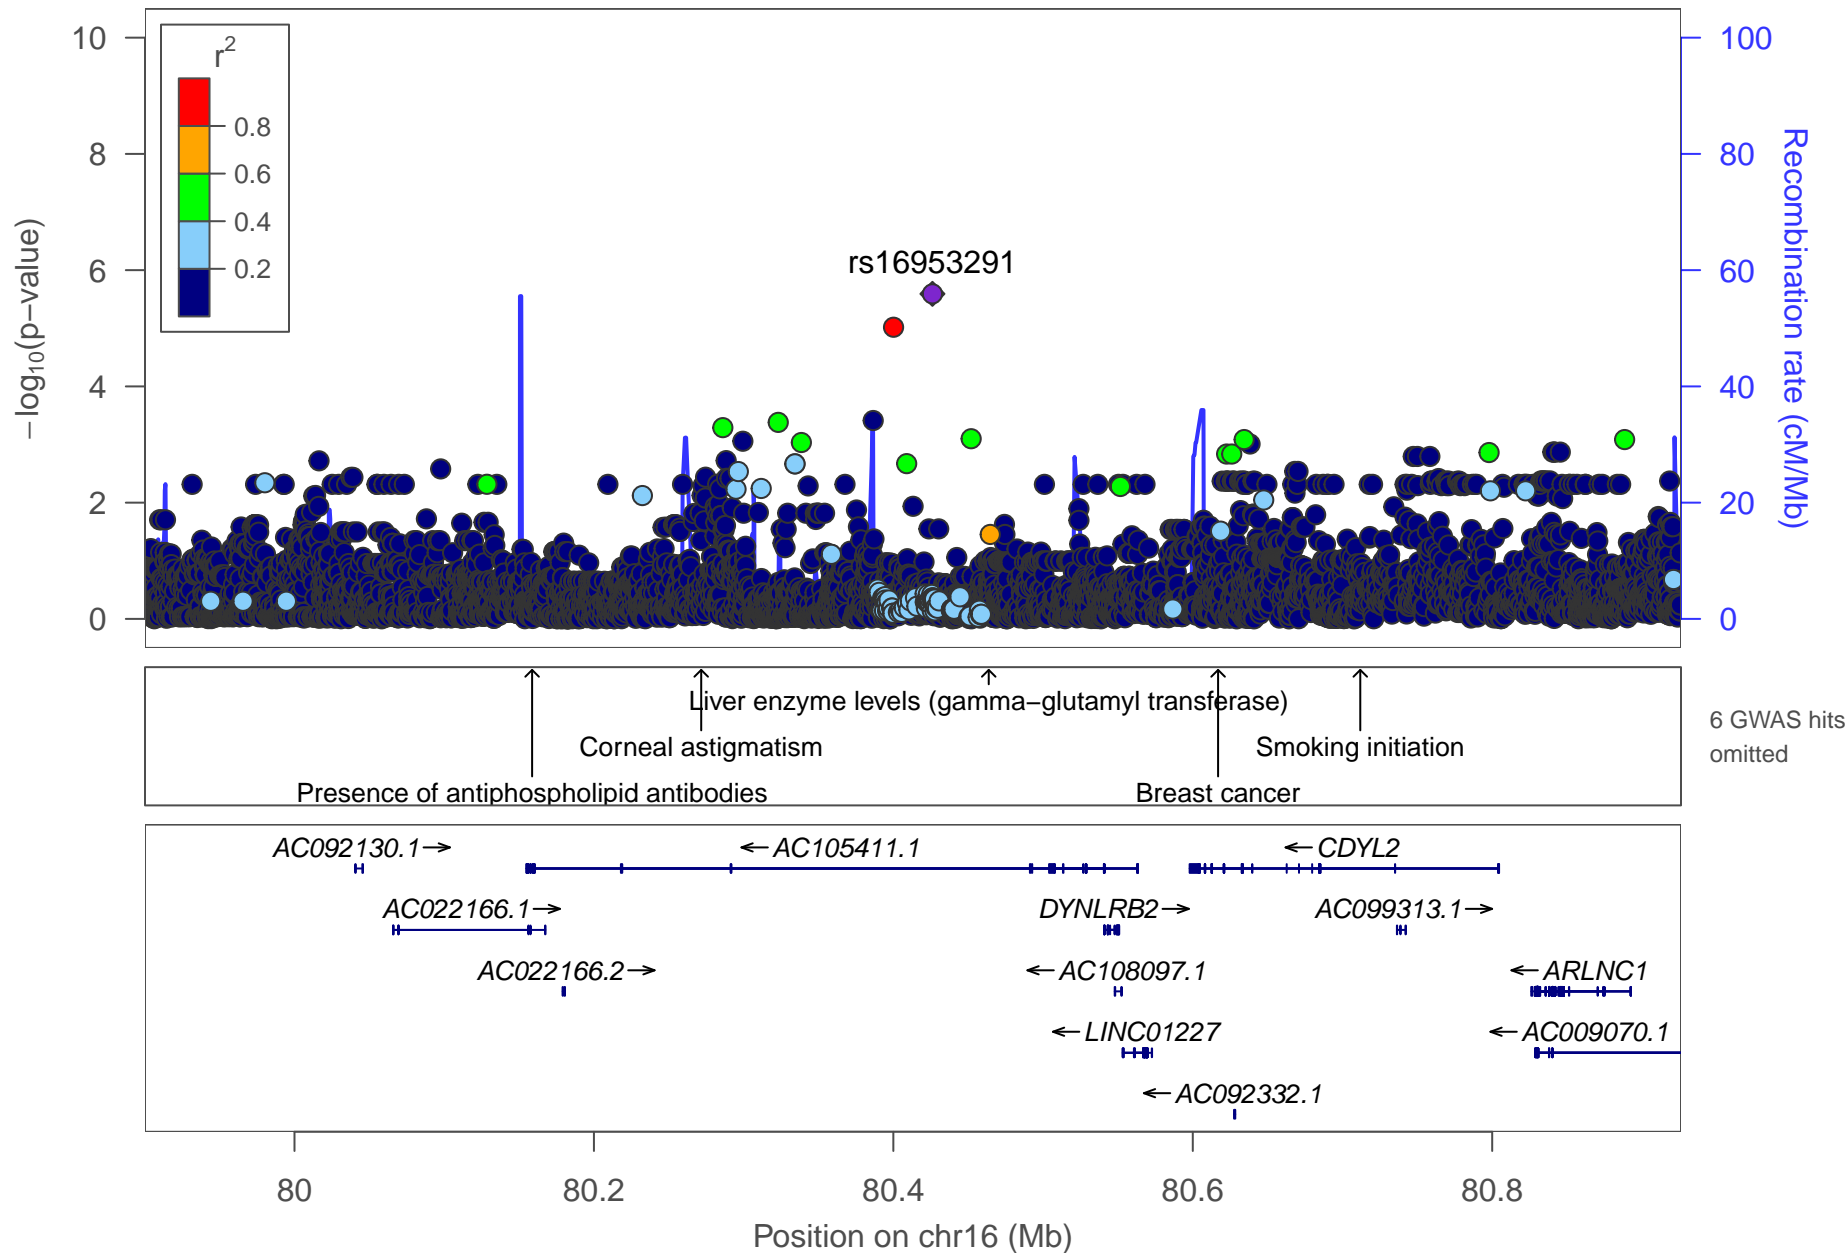



date: Thu Oct 20 22:13:36 2022

build: hg38

display range: chr16:79900141–80926104 [79900141–80926104]

hilite range: 0 – 0 [ 0 – 0 ]

reference SNP: chr16:80426104

number of SNPs plotted: 5085

min P-value: 2.56E–6 [chr16:80426104]

max P-value: 9.99E–1 [chr16:80707691]

omitted GWAS Hits: NA, NA

omitted GWAS Hits: NA, NA

## GWAS Catalog SNPs in Region

| <b>chr</b> | <b>pos (Mb)</b> | <b>trait</b>                                     | <b>snp</b>  |
|------------|-----------------|--------------------------------------------------|-------------|
| 16         | 79.95780        | Depressive symptoms (SSRI exposure interaction)  | rs10514475  |
| 16         | 80.07197        | Bipolar disorder and eating disorder             | rs12149074  |
| 16         | 80.07197        | Eating disorder in bipolar disorder              | rs12149074  |
| 16         | 80.15871        | Presence of antiphospholipid antibodies          | rs8060581   |
| 16         | 80.26465        | Alzheimer disease and age of onset               | rs79358781  |
| 16         | 80.27165        | Corneal astigmatism                              | rs11859036  |
| 16         | 80.43330        | Alzheimer disease and age of onset               | rs137967137 |
| 16         | 80.46370        | Liver enzyme levels (gamma-glutamyl transferase) | rs4581712   |
| 16         | 80.61691        | Breast cancer                                    | rs13329835  |
| 16         | 80.71188        | Smoking initiation                               | rs41472047  |
| 16         | 80.75155        | Inflammatory bowel disease                       | rs16953946  |

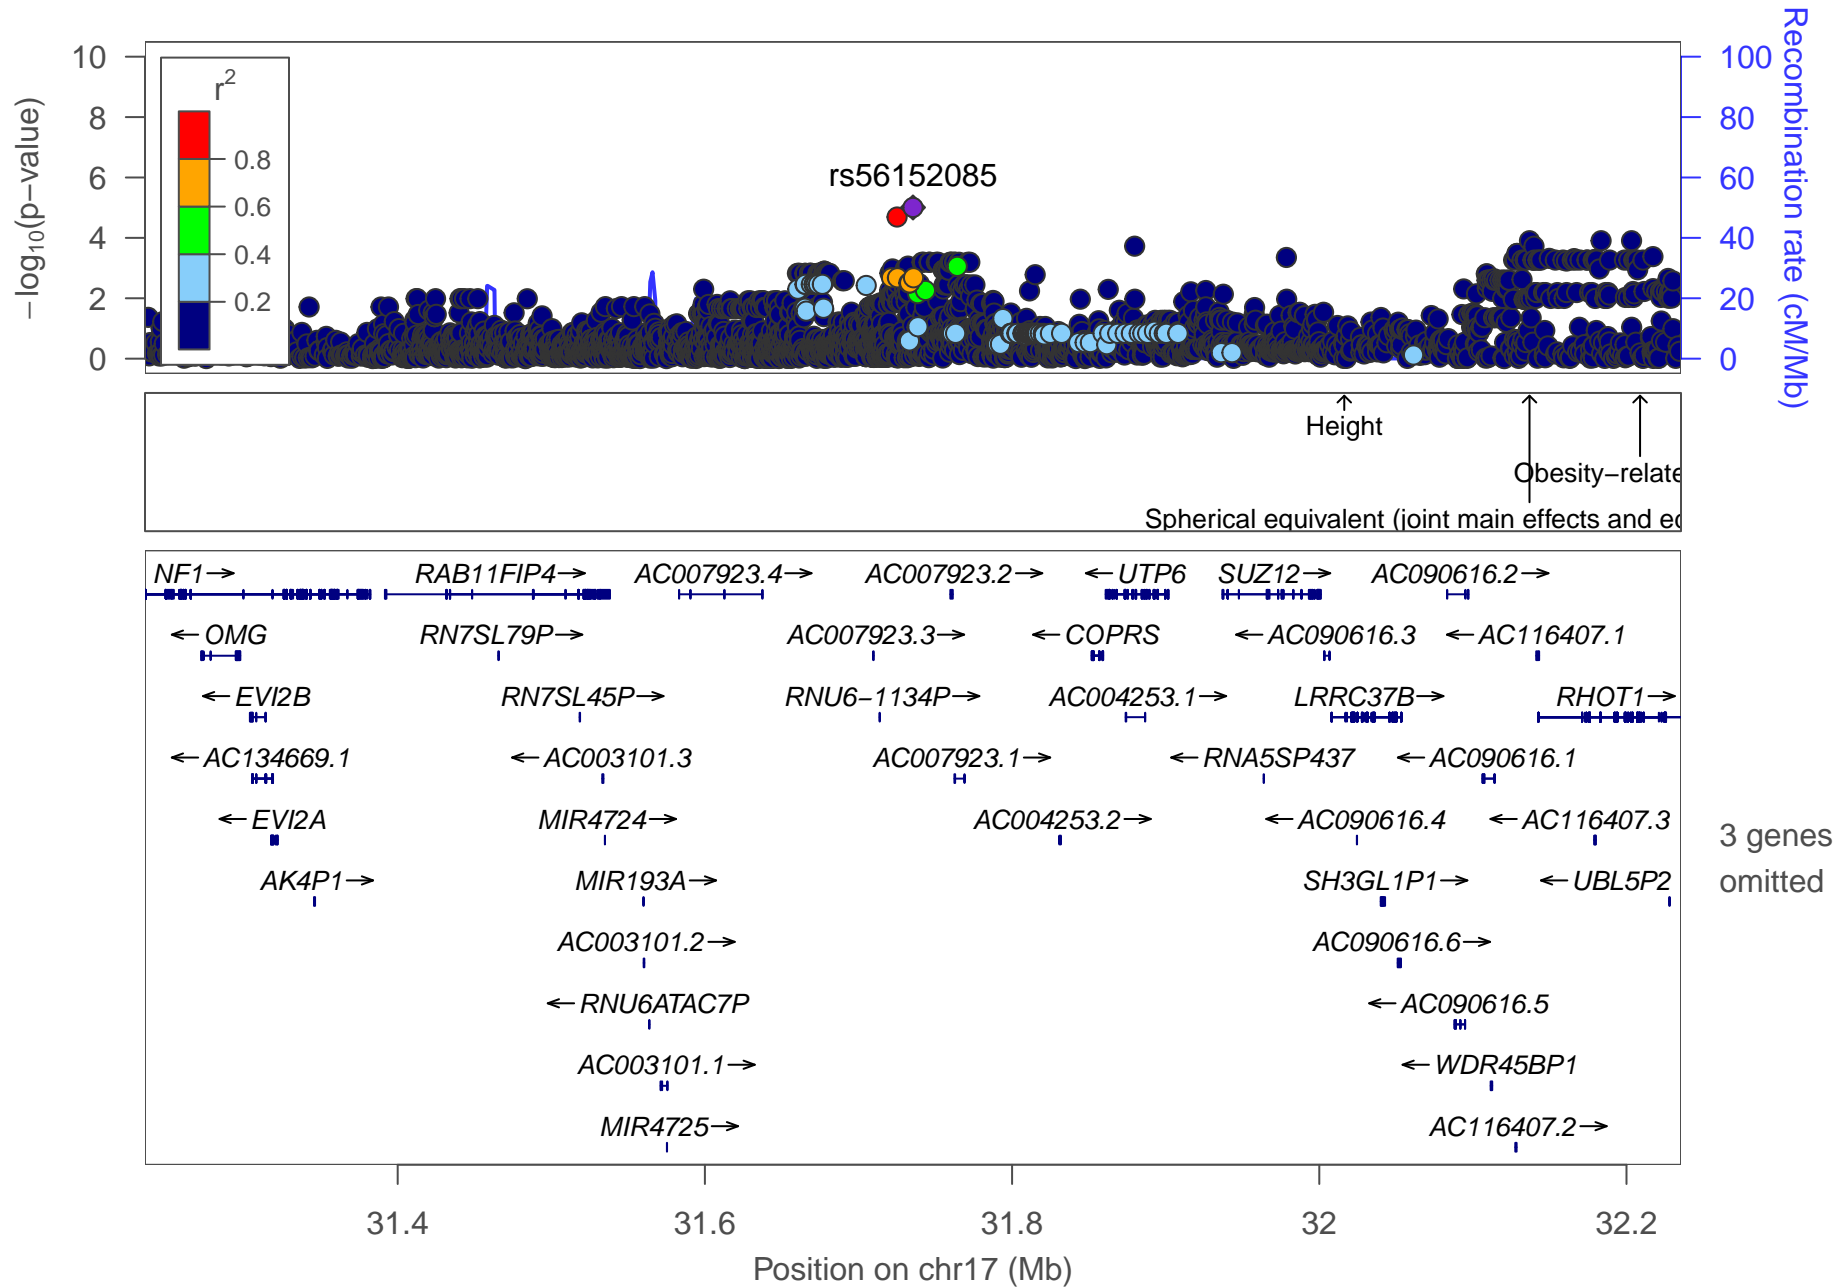

date: Thu Oct 20 22:13:35 2022

build: hg38

display range: chr17:31235486–32235486 [31235486–32235486]

hilite range: 0 – 0 [ 0 – 0 ]

reference SNP: chr17:31735486

number of SNPs plotted: 2994

min P-value: 9.84E–6 [chr17:31735486]

max P-value: 9.98E–1 [chr17:31483072]

omitted Genes: MIR365B, ARGFXP2, AC116407.4

## GWAS Catalog SNPs in Region

| <b>chr</b> | <b>pos (Mb)</b> | <b>trait</b>                                                        | <b>snp</b> |
|------------|-----------------|---------------------------------------------------------------------|------------|
| 17         | 32.01626        | Height                                                              | rs17780086 |
| 17         | 32.13687        | Spherical equivalent (joint main effects and education interaction) | rs72483203 |
| 17         | 32.20884        | Obesity-related traits                                              | rs17780304 |

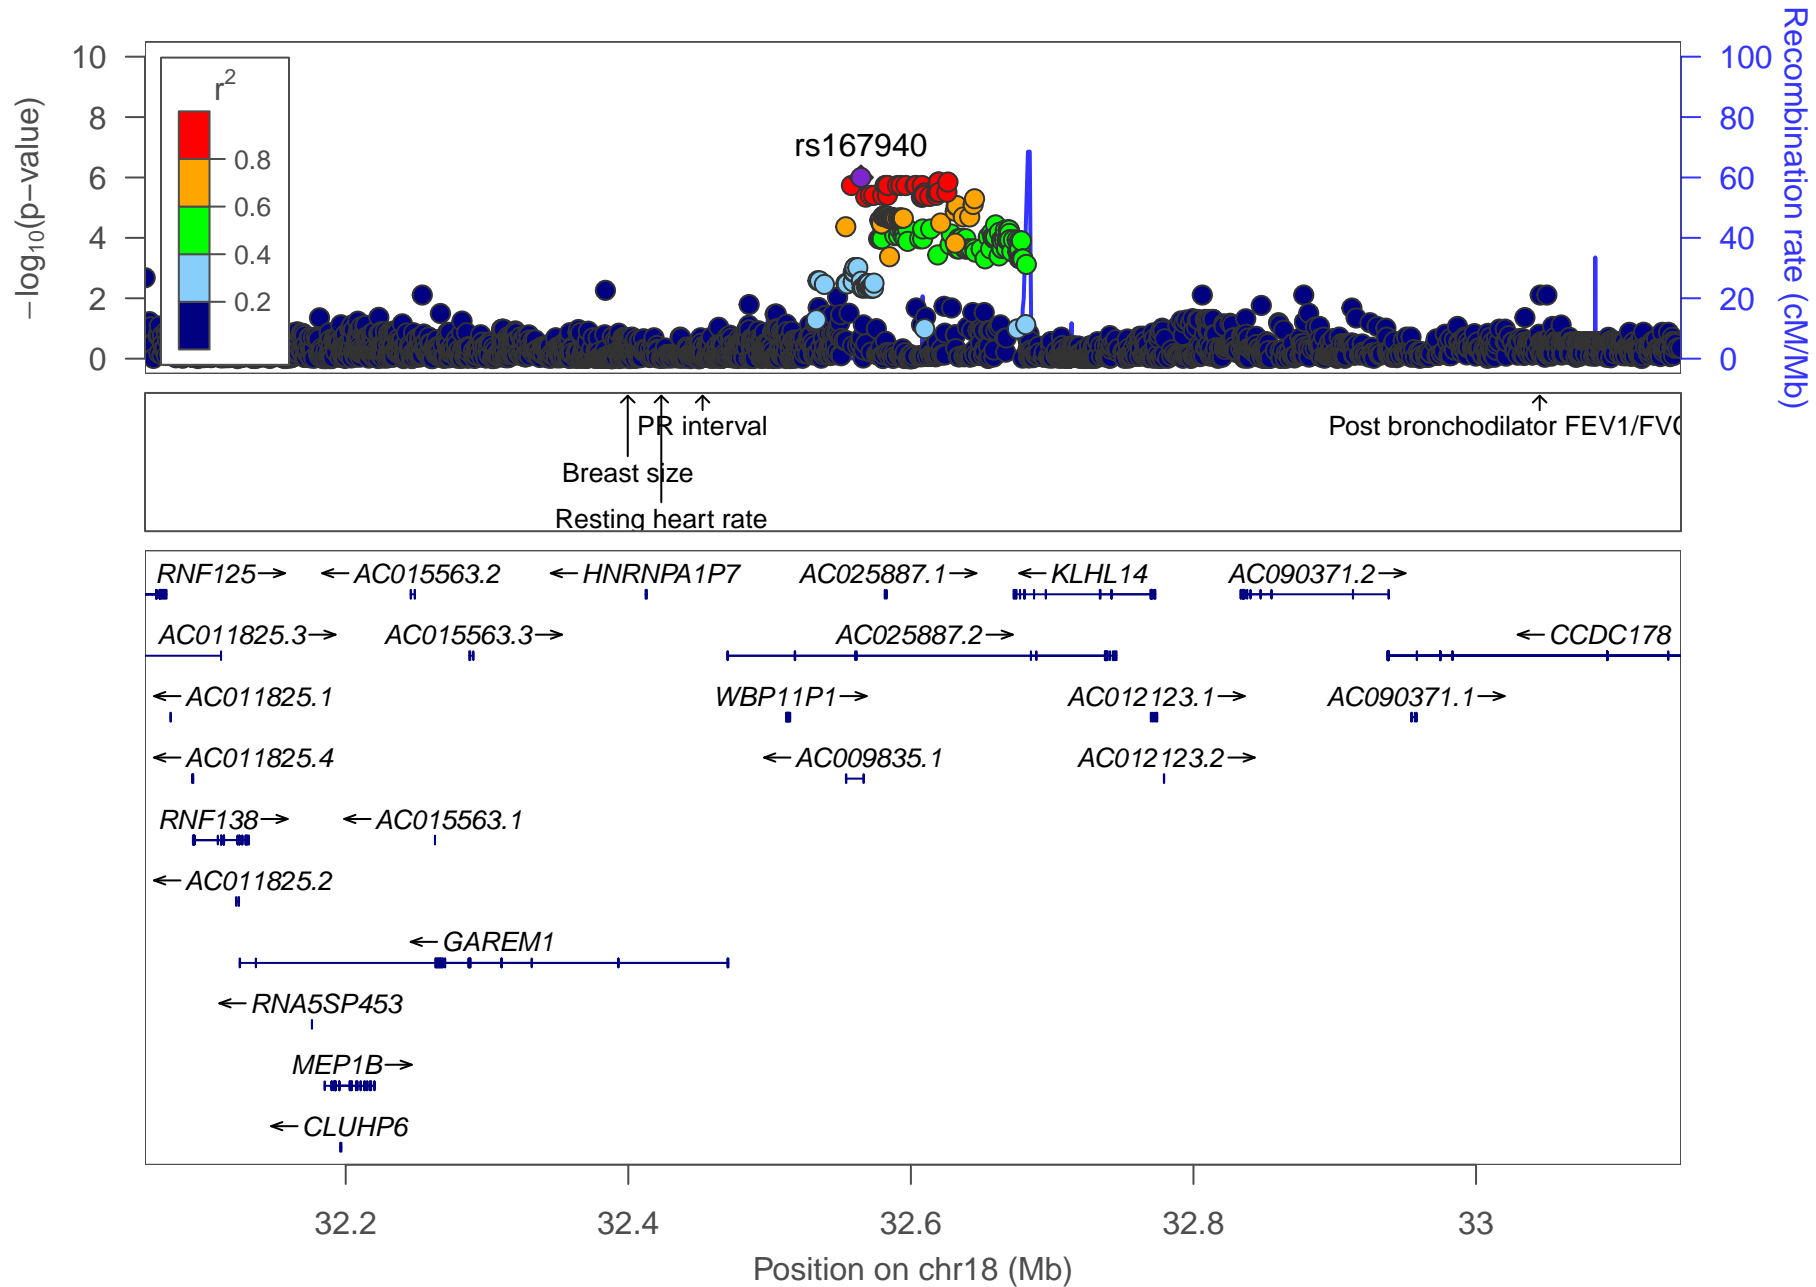

date: Thu Oct 20 22:13:31 2022

build: hg38

display range: chr18:32057937–33145059 [32057937–33145059]

hilite range: 0 – 0 [ 0 – 0 ]

reference SNP: chr18:32564660

number of SNPs plotted: 2809

min P-value: 1E–6 [chr18:32564660]

max P-value: 9.99E–1 [chr18:32444036]

## GWAS Catalog SNPs in Region

| <b>chr</b> | <b>pos (Mb)</b> | <b>trait</b>                       | <b>snp</b>  |
|------------|-----------------|------------------------------------|-------------|
| 18         | 32.39961        | Breast size                        | rs58263042  |
| 18         | 32.42336        | Resting heart rate                 | rs11081761  |
| 18         | 32.45256        | PR interval                        | rs17744182  |
| 18         | 33.04505        | Post bronchodilator FEV1/FVC ratio | rs190650493 |



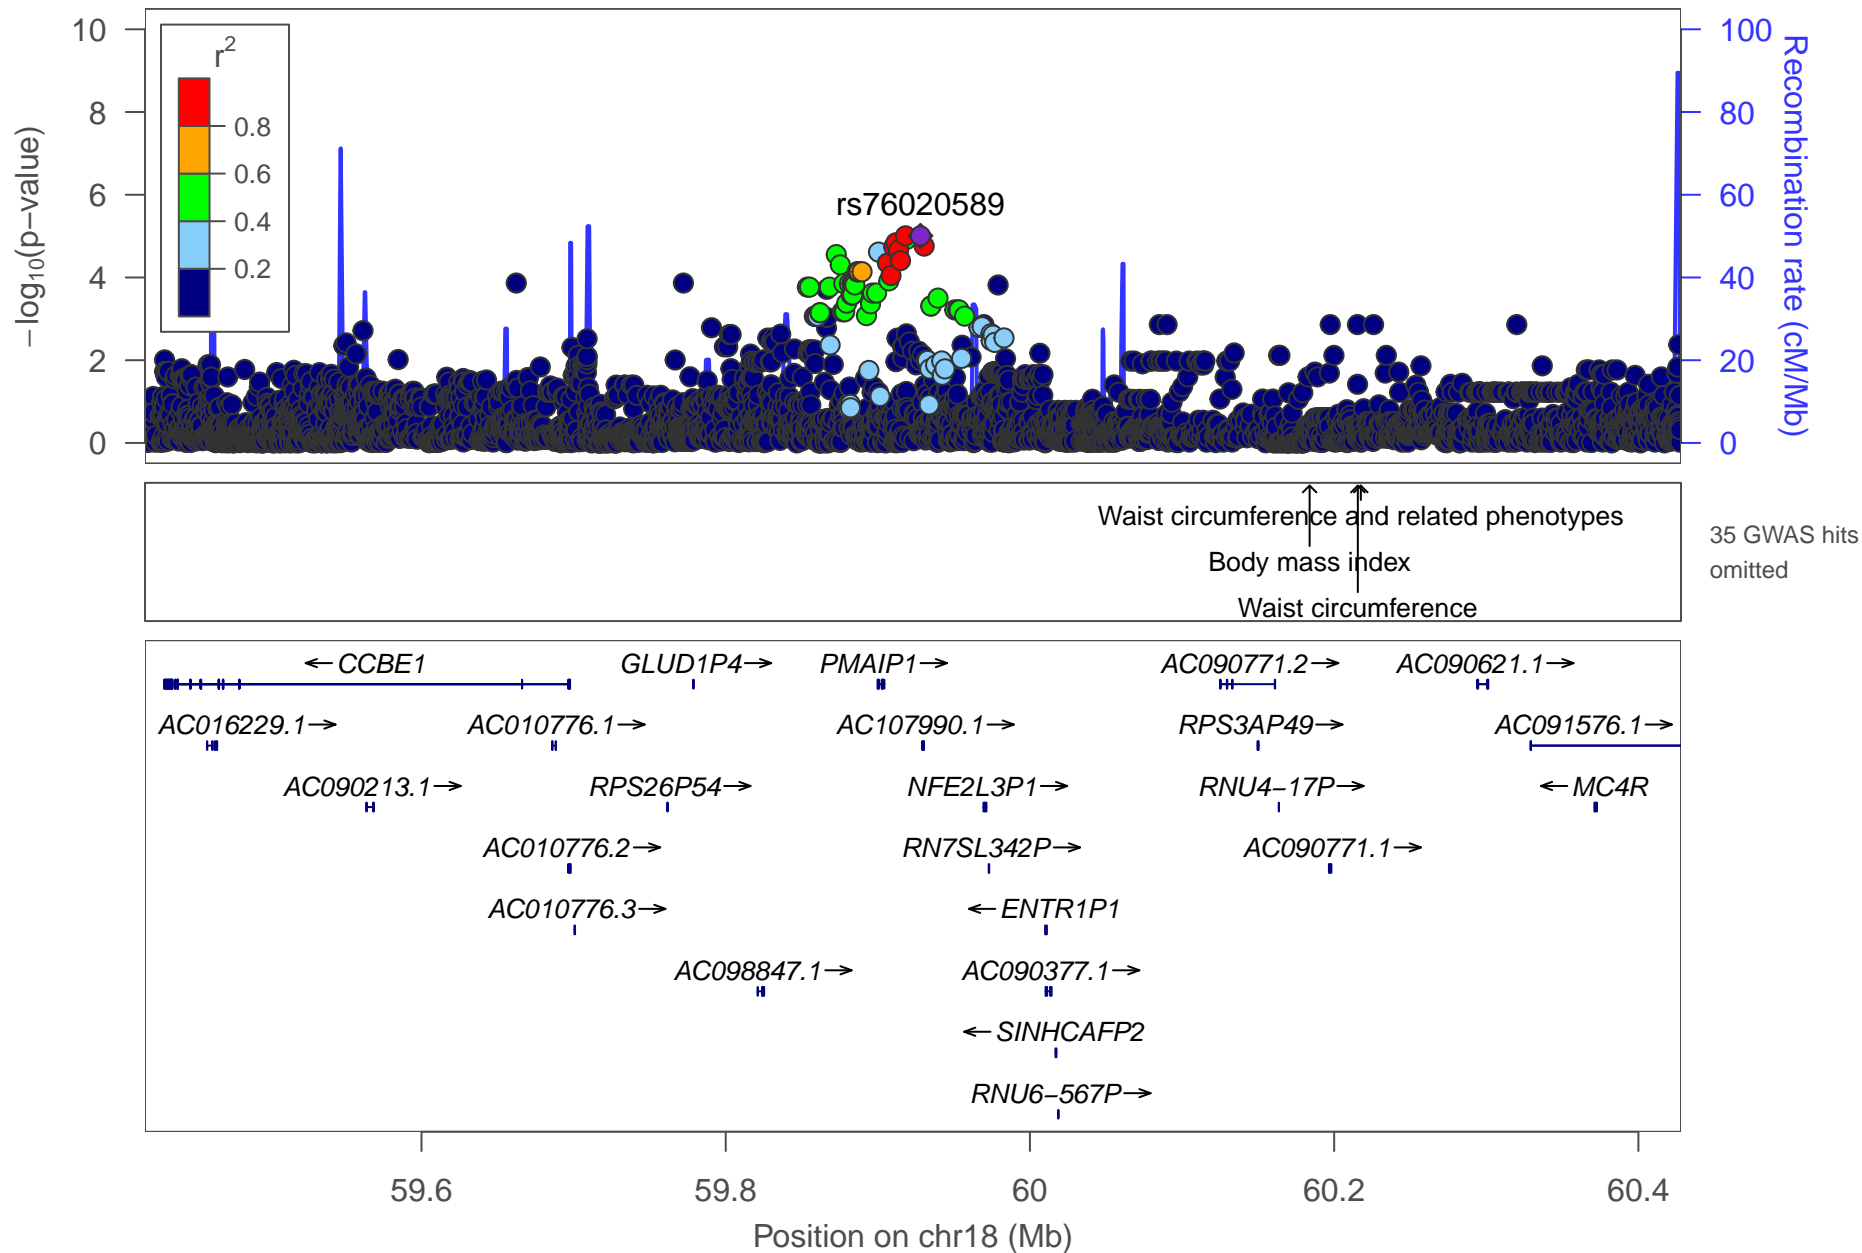

date: Thu Oct 20 22:13:34 2022

build: hg38

display range: chr18:59418230–60428012 [59418230–60428012]

hilite range: 0 – 0 [ 0 – 0 ]

reference SNP: chr18:59928012

number of SNPs plotted: 4182

min P-value: 9.85E–6 [chr18:59918230]

max P-value: 9.99E–1 [chr18:59721823]

omitted GWAS Hits: NA, NA

GWAS Catalog SNPs in Region

| chr | pos (Mb) | trait                                                            | snp         |
|-----|----------|------------------------------------------------------------------|-------------|
| 18  | 59.48481 | Age-related hearing impairment                                   | rs12955474  |
| 18  | 59.64758 | Major depressive disorder                                        | rs11152166  |
| 18  | 59.83615 | Response to bleomycin (chromatid breaks)                         | rs8093763   |
| 18  | 59.91425 | Alzheimer disease and age of onset                               | rs142176337 |
| 18  | 59.95506 | Chronic lymphocytic leukemia                                     | rs4368253   |
| 18  | 60.00657 | Body mass index                                                  | rs12964056  |
| 18  | 60.06762 | Body mass index                                                  | rs7234864   |
| 18  | 60.08378 | Metabolic syndrome                                               | rs12957347  |
| 18  | 60.14475 | Obesity (early onset extreme)                                    | rs17700144  |
| 18  | 60.16140 | Body mass index                                                  | rs2331841   |
| 18  | 60.16190 | Body mass index                                                  | rs6567160   |
| 18  | 60.16190 | Fat body mass                                                    | rs6567160   |
| 18  | 60.16190 | Childhood body mass index                                        | rs6567160   |
| 18  | 60.16190 | Body fat percentage                                              | rs6567160   |
| 18  | 60.17117 | Coronary artery disease                                          | rs663129    |
| 18  | 60.17254 | Body mass index                                                  | rs571312    |
| 18  | 60.17254 | Body mass index (age interaction)                                | rs571312    |
| 18  | 60.17254 | C-reactive protein levels or triglyceride levels (pleiotropy)    | rs571312    |
| 18  | 60.17436 | Body mass index                                                  | rs591166    |
| 18  | 60.18179 | HDL cholesterol                                                  | rs12967135  |
| 18  | 60.18179 | C-reactive protein levels or HDL-cholesterol levels (pleiotropy) | rs12967135  |

## GWAS Catalog SNPs in Region

| <b>chr</b> | <b>pos (Mb)</b> | <b>trait</b>                               | <b>snp</b> |
|------------|-----------------|--------------------------------------------|------------|
| 18         | 60.18319        | Obesity                                    | rs538656   |
| 18         | 60.18386        | Body mass index                            | rs17782313 |
| 18         | 60.18386        | Height                                     | rs17782313 |
| 18         | 60.18386        | Obesity                                    | rs17782313 |
| 18         | 60.18453        | Obesity                                    | rs10871777 |
| 18         | 60.18535        | Obesity (early onset extreme)              | rs476828   |
| 18         | 60.18572        | Obesity                                    | rs11152213 |
| 18         | 60.18572        | Height                                     | rs11152213 |
| 18         | 60.19160        | Body mass index                            | rs8089364  |
| 18         | 60.20576        | Urate levels                               | rs12955983 |
| 18         | 60.21555        | Waist circumference                        | rs489693   |
| 18         | 60.21555        | Antipsychotic drug-induced weight gain     | rs489693   |
| 18         | 60.21752        | Waist circumference and related phenotypes | rs12970134 |
| 18         | 60.21752        | Body mass index                            | rs12970134 |
| 18         | 60.21752        | Type 2 diabetes                            | rs12970134 |
| 18         | 60.21752        | Weight                                     | rs12970134 |
| 18         | 60.29588        | Obesity-related traits                     | rs17773430 |

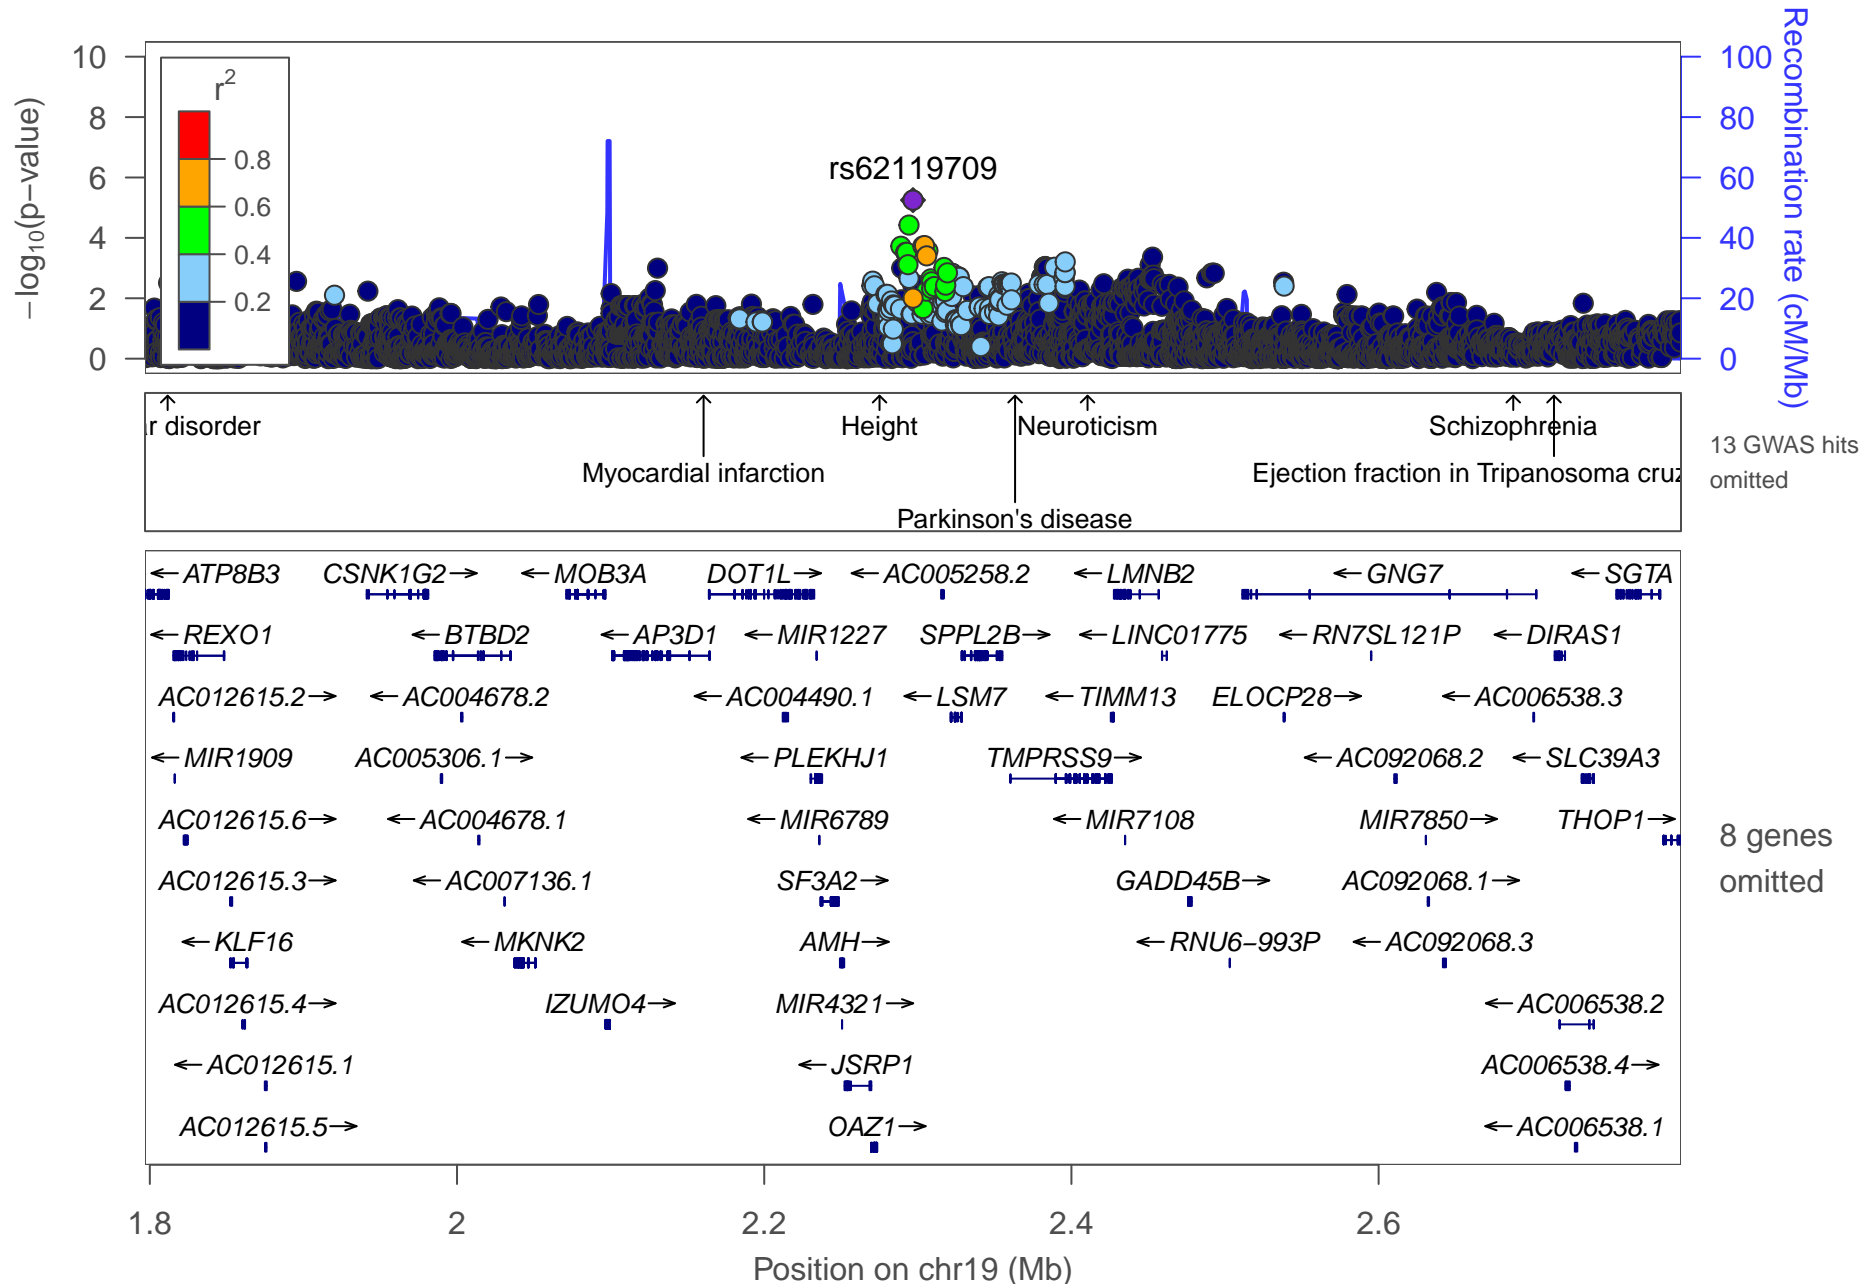

date: Thu Oct 20 22:13:36 2022

build: hg38

display range: chr19:1796860–2796863 [1796860–2796863]

hilite range: 0 – 0 [ 0 – 0 ]

reference SNP: chr19:2296863

number of SNPs plotted: 3977

min P-value: 5.61E–6 [chr19:2296860]

max P-value: 10E–1 [chr19:1833291]

omitted Genes: ABHD17A, SCAMP4, ADAT3

omitted Genes: CSNK1G2–AS1, AC005258.1, PEAK3

omitted Genes: LINGO3, AC104530.1

omitted GWAS Hits: chr19:2.714172–Ejection fraction in Trypanosoma cruzi seropositivity, chr19:2.687653–Schizoph

omitted GWAS Hits: NA, NA

omitted GWAS Hits: NA, NA

omitted GWAS Hits: NA, NA

omitted GWAS Hits: NA

GWAS Catalog SNPs in Region

| chr | pos (Mb) | trait                                                                   | snp         |
|-----|----------|-------------------------------------------------------------------------|-------------|
| 19  | 1.803583 | Obesity-related traits                                                  | rs7253430   |
| 19  | 1.811604 | Bipolar disorder                                                        | rs7250872   |
| 19  | 1.937194 | Body mass index                                                         | rs11672550  |
| 19  | 2.048282 | Subjective well-being                                                   | rs12610177  |
| 19  | 2.160530 | Myocardial infarction                                                   | rs3803915   |
| 19  | 2.160530 | Body mass index                                                         | rs3803915   |
| 19  | 2.170955 | Height                                                                  | rs12986413  |
| 19  | 2.176404 | Height                                                                  | rs11880992  |
| 19  | 2.176404 | Hip minimal joint space width                                           | rs11880992  |
| 19  | 2.177194 | Osteoarthritis                                                          | rs12982744  |
| 19  | 2.177194 | Height                                                                  | rs12982744  |
| 19  | 2.214058 | Plasma omega-6 polyunsaturated fatty acid levels (gamma-linolenic acid) | rs2074552   |
| 19  | 2.232222 | Pulse pressure                                                          | rs740406    |
| 19  | 2.275080 | Height                                                                  | rs2523178   |
| 19  | 2.363321 | Parkinson's disease                                                     | rs62120679  |
| 19  | 2.410486 | Neuroticism                                                             | rs4806846   |
| 19  | 2.522673 | 3-hydroxypropylmercapturic acid levels in smokers                       | rs74407240  |
| 19  | 2.547017 | Ejection fraction in <i>Trypanosoma cruzi</i> seropositivity            | rs6510683   |
| 19  | 2.687653 | Schizophrenia                                                           | rs57549656  |
| 19  | 2.714172 | Ejection fraction in <i>Trypanosoma cruzi</i> seropositivity            | rs185543003 |

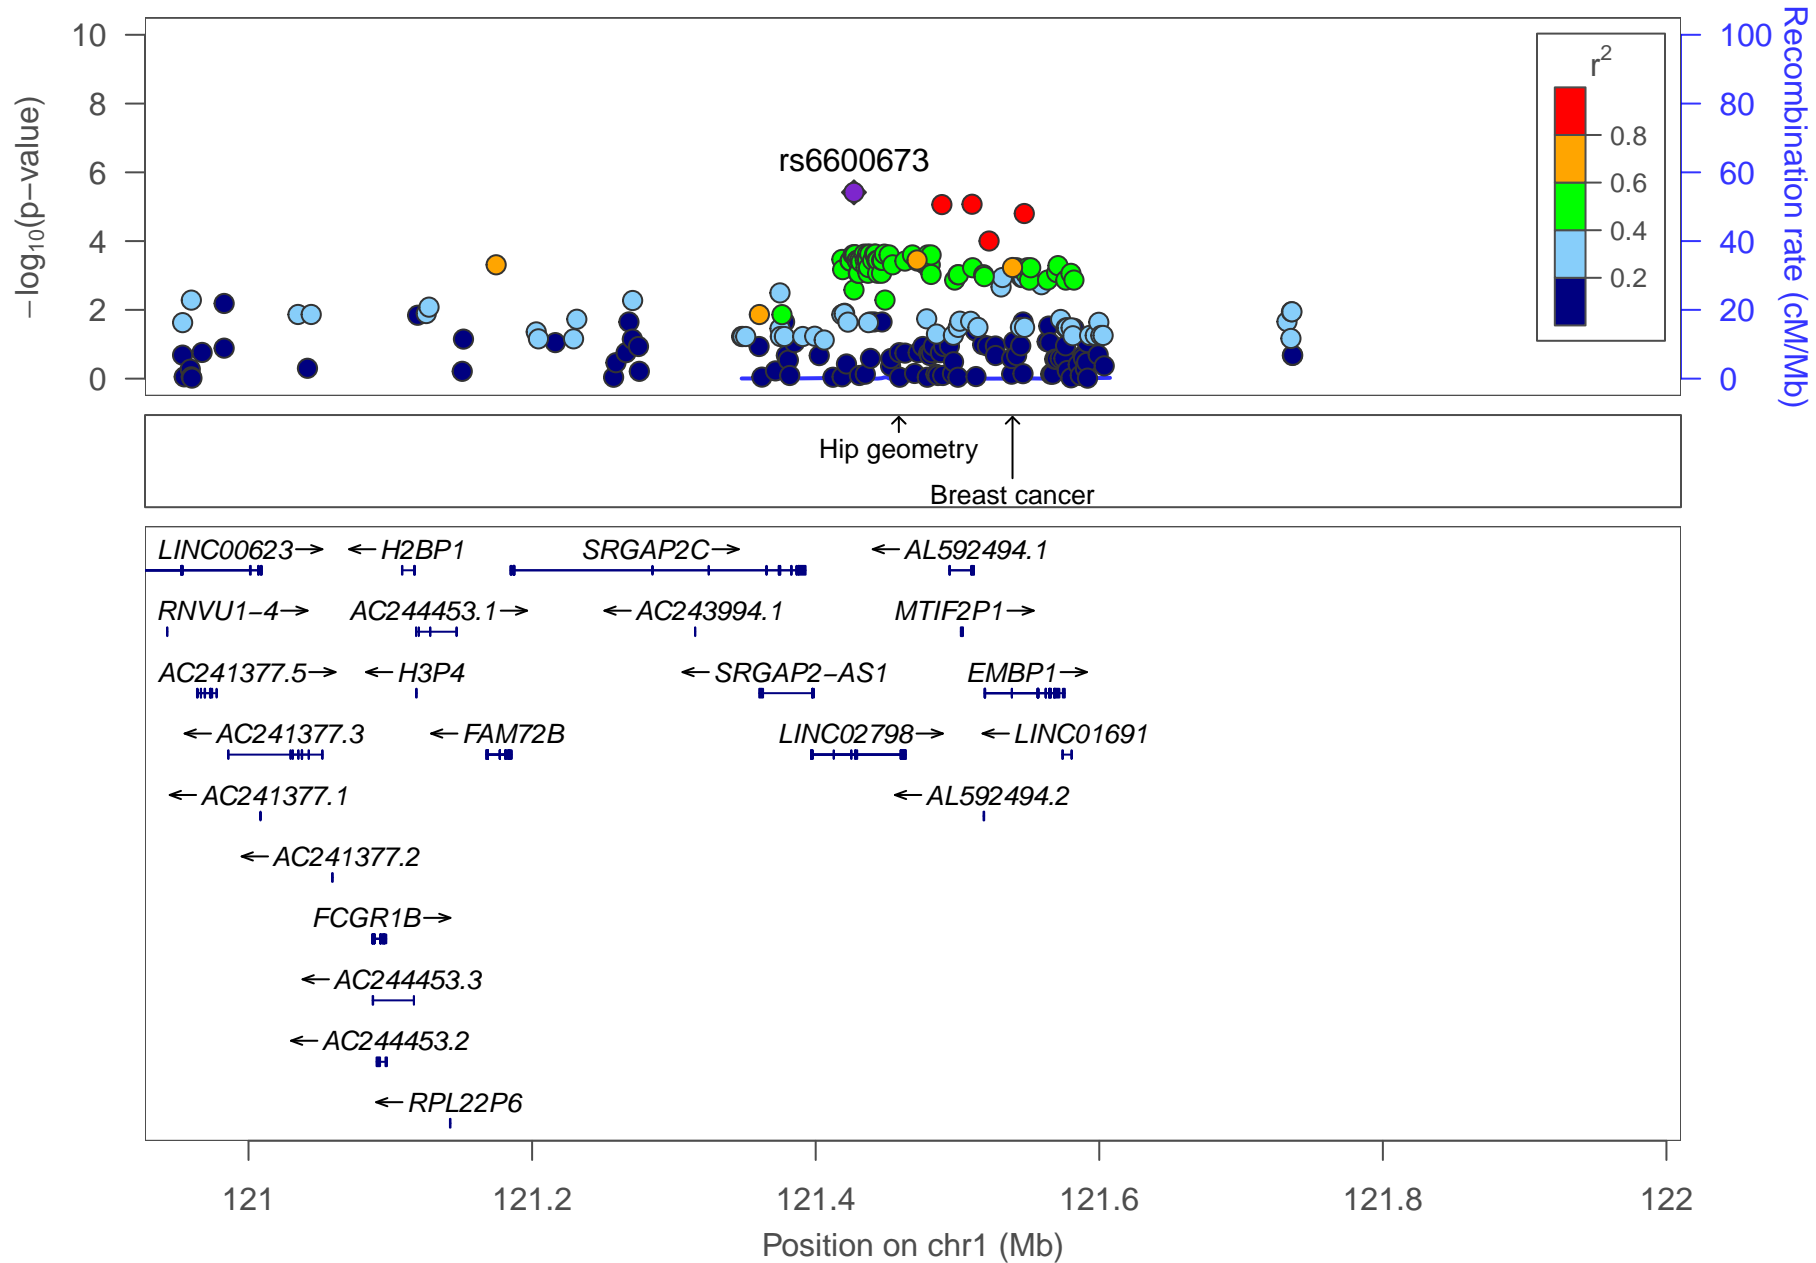



date: Thu Oct 20 22:13:31 2022

build: hg38

display range: chr1:120926988–122010262 [120926988–122010262]

hilite range: 0 – 0 [ 0 – 0 ]

reference SNP: chr1:121426988

number of SNPs plotted: 230

min P-value: 3.82E-6 [chr1:121426988]

max P-value: 9.67E-1 [chr1:121591719]

## GWAS Catalog SNPs in Region

| chr | pos (Mb) | trait         | snp        |
|-----|----------|---------------|------------|
| 1   | 121.4586 | Hip geometry  | rs6600671  |
| 1   | 121.5388 | Breast cancer | rs11249433 |

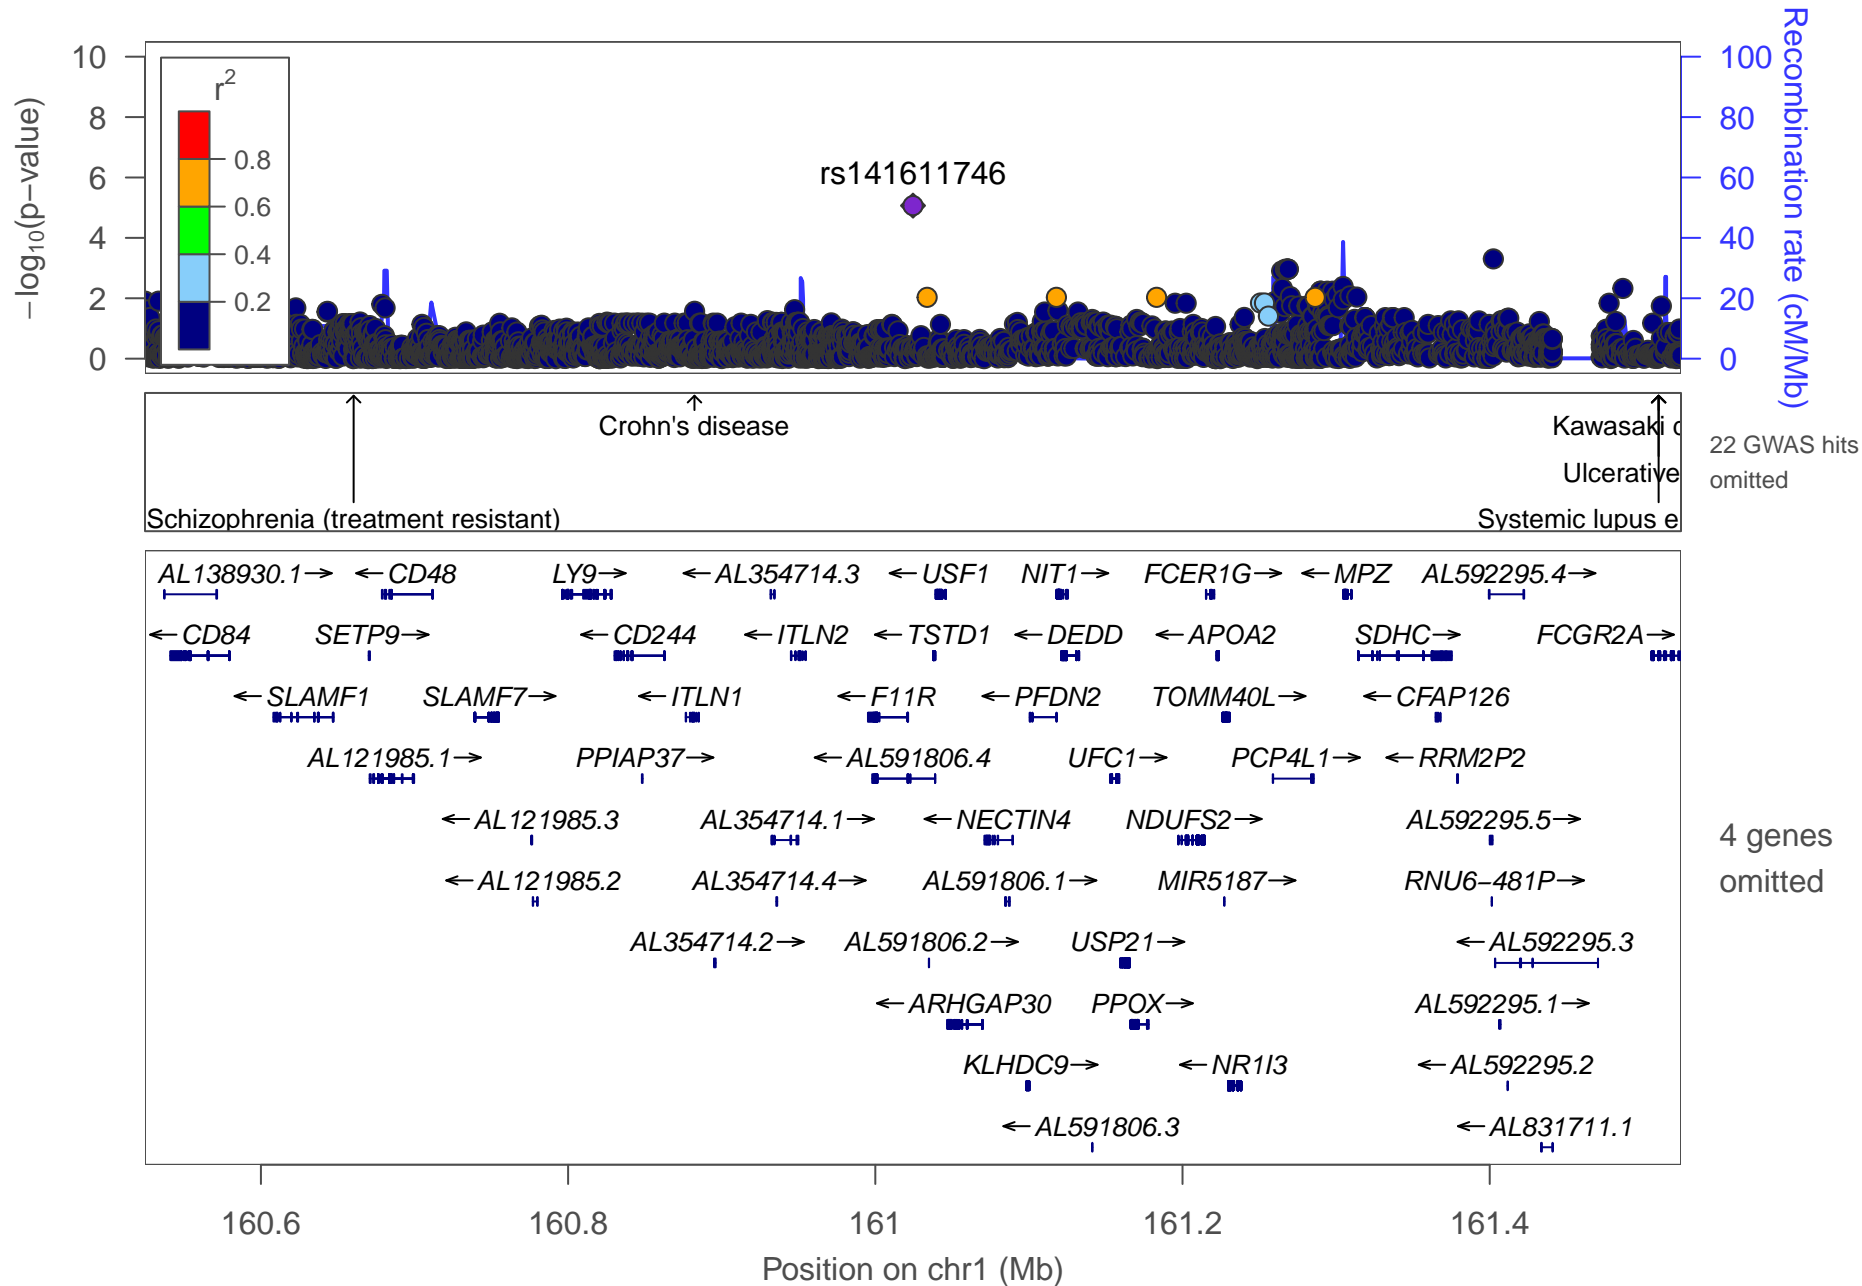

date: Thu Oct 20 22:13:36 2022

build: hg38

display range: chr1:160524526–161524526 [160524526–161524526]

hilite range: 0 – 0 [ 0 – 0 ]

reference SNP: chr1:161024526

number of SNPs plotted: 2999

min P-value: 8.55E–6 [chr1:161024526]

max P-value: 10E–1 [chr1:161070828]

omitted Genes: AL590714.1, B4GALT3, ADAMTS4

omitted Genes: AL590385.2

omitted GWAS Hits: NA, NA

omitted GWAS Hits: NA

GWAS Catalog SNPs in Region

| chr | pos (Mb) | trait                                                                                  | snp        |
|-----|----------|----------------------------------------------------------------------------------------|------------|
| 1   | 160.5465 | Response to anti-TNF therapy in rheumatoid arthritis                                   | rs6427528  |
| 1   | 160.6604 | Schizophrenia (treatment resistant)                                                    | rs11265461 |
| 1   | 160.6733 | Microalbuminuria                                                                       | rs3795324  |
| 1   | 160.7740 | Cervical cancer                                                                        | rs12068654 |
| 1   | 160.7763 | Capecitabine sensitivity                                                               | rs576523   |
| 1   | 160.8605 | Crohn's disease                                                                        | rs4656940  |
| 1   | 160.8823 | Crohn's disease                                                                        | rs2274910  |
| 1   | 160.8847 | Inflammatory bowel disease                                                             | rs2297559  |
| 1   | 160.8872 | Ulcerative colitis                                                                     | rs4656958  |
| 1   | 160.8872 | Crohn's disease                                                                        | rs4656958  |
| 1   | 160.8872 | Inflammatory bowel disease                                                             | rs4656958  |
| 1   | 161.0567 | Night sleep phenotypes                                                                 | rs12130871 |
| 1   | 161.0638 | Night sleep phenotypes                                                                 | rs12135996 |
| 1   | 161.2205 | Metabolite levels (lipoprotein measures)                                               | rs4503368  |
| 1   | 161.2307 | Blood metabolite levels                                                                | rs4073054  |
| 1   | 161.3027 | Visceral adipose tissue adjusted for BMI                                               | rs4657015  |
| 1   | 161.4353 | Rheumatoid arthritis                                                                   | rs72717009 |
| 1   | 161.4938 | Functional impairment in major depressive disorder, bipolar disorder and schizophrenia | rs7535475  |
| 1   | 161.5024 | Ulcerative colitis                                                                     | rs10800309 |
| 1   | 161.5024 | Inflammatory bowel disease                                                             | rs10800309 |
| 1   | 161.5090 | Systemic lupus erythematosus                                                           | rs6671847  |

## GWAS Catalog SNPs in Region

| <b>chr</b> | <b>pos (Mb)</b> | <b>trait</b>                         | <b>snp</b> |
|------------|-----------------|--------------------------------------|------------|
| 1          | 161.5100        | Kawasaki disease                     | rs1801274  |
| 1          | 161.5100        | Ulcerative colitis                   | rs1801274  |
| 1          | 161.5100        | Systemic lupus erythematosus         | rs1801274  |
| 1          | 161.5100        | Crohn's disease                      | rs1801274  |
| 1          | 161.5100        | Inflammatory bowel disease           | rs1801274  |
| 1          | 161.5144        | Helicobacter pylori serologic status | rs368433   |

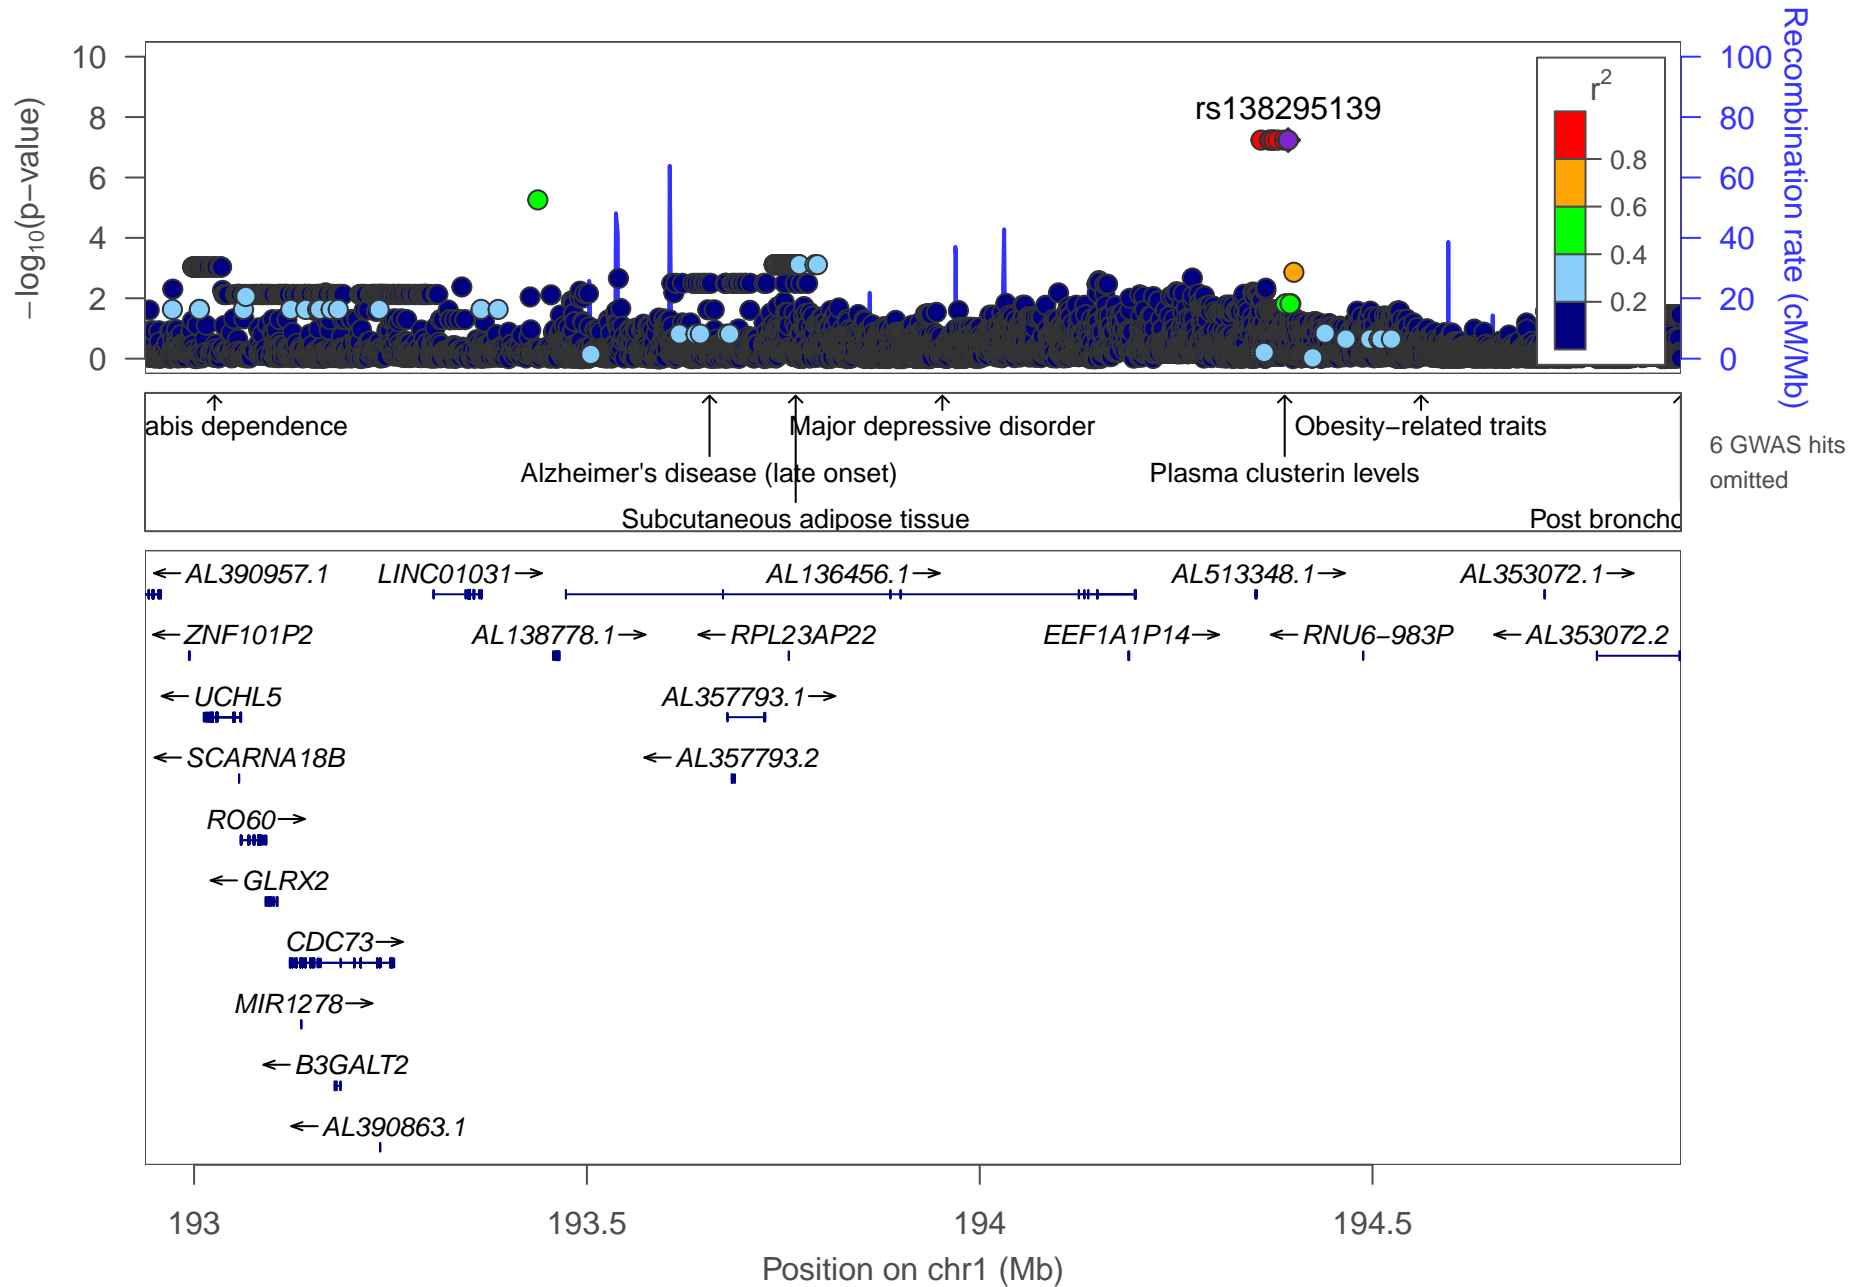

date: Thu Oct 20 22:13:36 2022

build: hg38

display range: chr1:192937542–194892636 [192937542–194892636]

hilite range: 0 – 0 [ 0 – 0 ]

reference SNP: chr1:194392636

number of SNPs plotted: 6800

min P-value: 5.78E–8 [chr1:194358014]

max P-value: 9.99E–1 [chr1:193400222]

omitted GWAS Hits: chr1:194.388206–Plasma clusterin levels, NA

omitted GWAS Hits: NA, NA



## GWAS Catalog SNPs in Region

| <b>chr</b> | <b>pos (Mb)</b> | <b>trait</b>                       | <b>snp</b>  |
|------------|-----------------|------------------------------------|-------------|
| 1          | 193.0261        | Cannabis dependence                | rs9427573   |
| 1          | 193.6561        | Alzheimer's disease (late onset)   | rs6678275   |
| 1          | 193.6705        | Post bronchodilator FEV1/FVC ratio | rs149819415 |
| 1          | 193.7658        | Subcutaneous adipose tissue        | rs2025934   |
| 1          | 193.7936        | Daytime sleep phenotypes           | rs113943039 |
| 1          | 193.9524        | Major depressive disorder          | rs606149    |
| 1          | 193.9933        | White matter hyperintensity burden | rs71642944  |
| 1          | 194.3882        | Plasma clusterin levels            | rs4428865   |
| 1          | 194.5618        | Obesity-related traits             | rs3001167   |
| 1          | 194.5799        | Post bronchodilator FEV1           | rs79237515  |
| 1          | 194.7204        | Post bronchodilator FEV1           | rs138325697 |
| 1          | 194.7899        | Post bronchodilator FEV1           | rs144324177 |
| 1          | 194.8925        | Post bronchodilator FEV1           | rs144276489 |

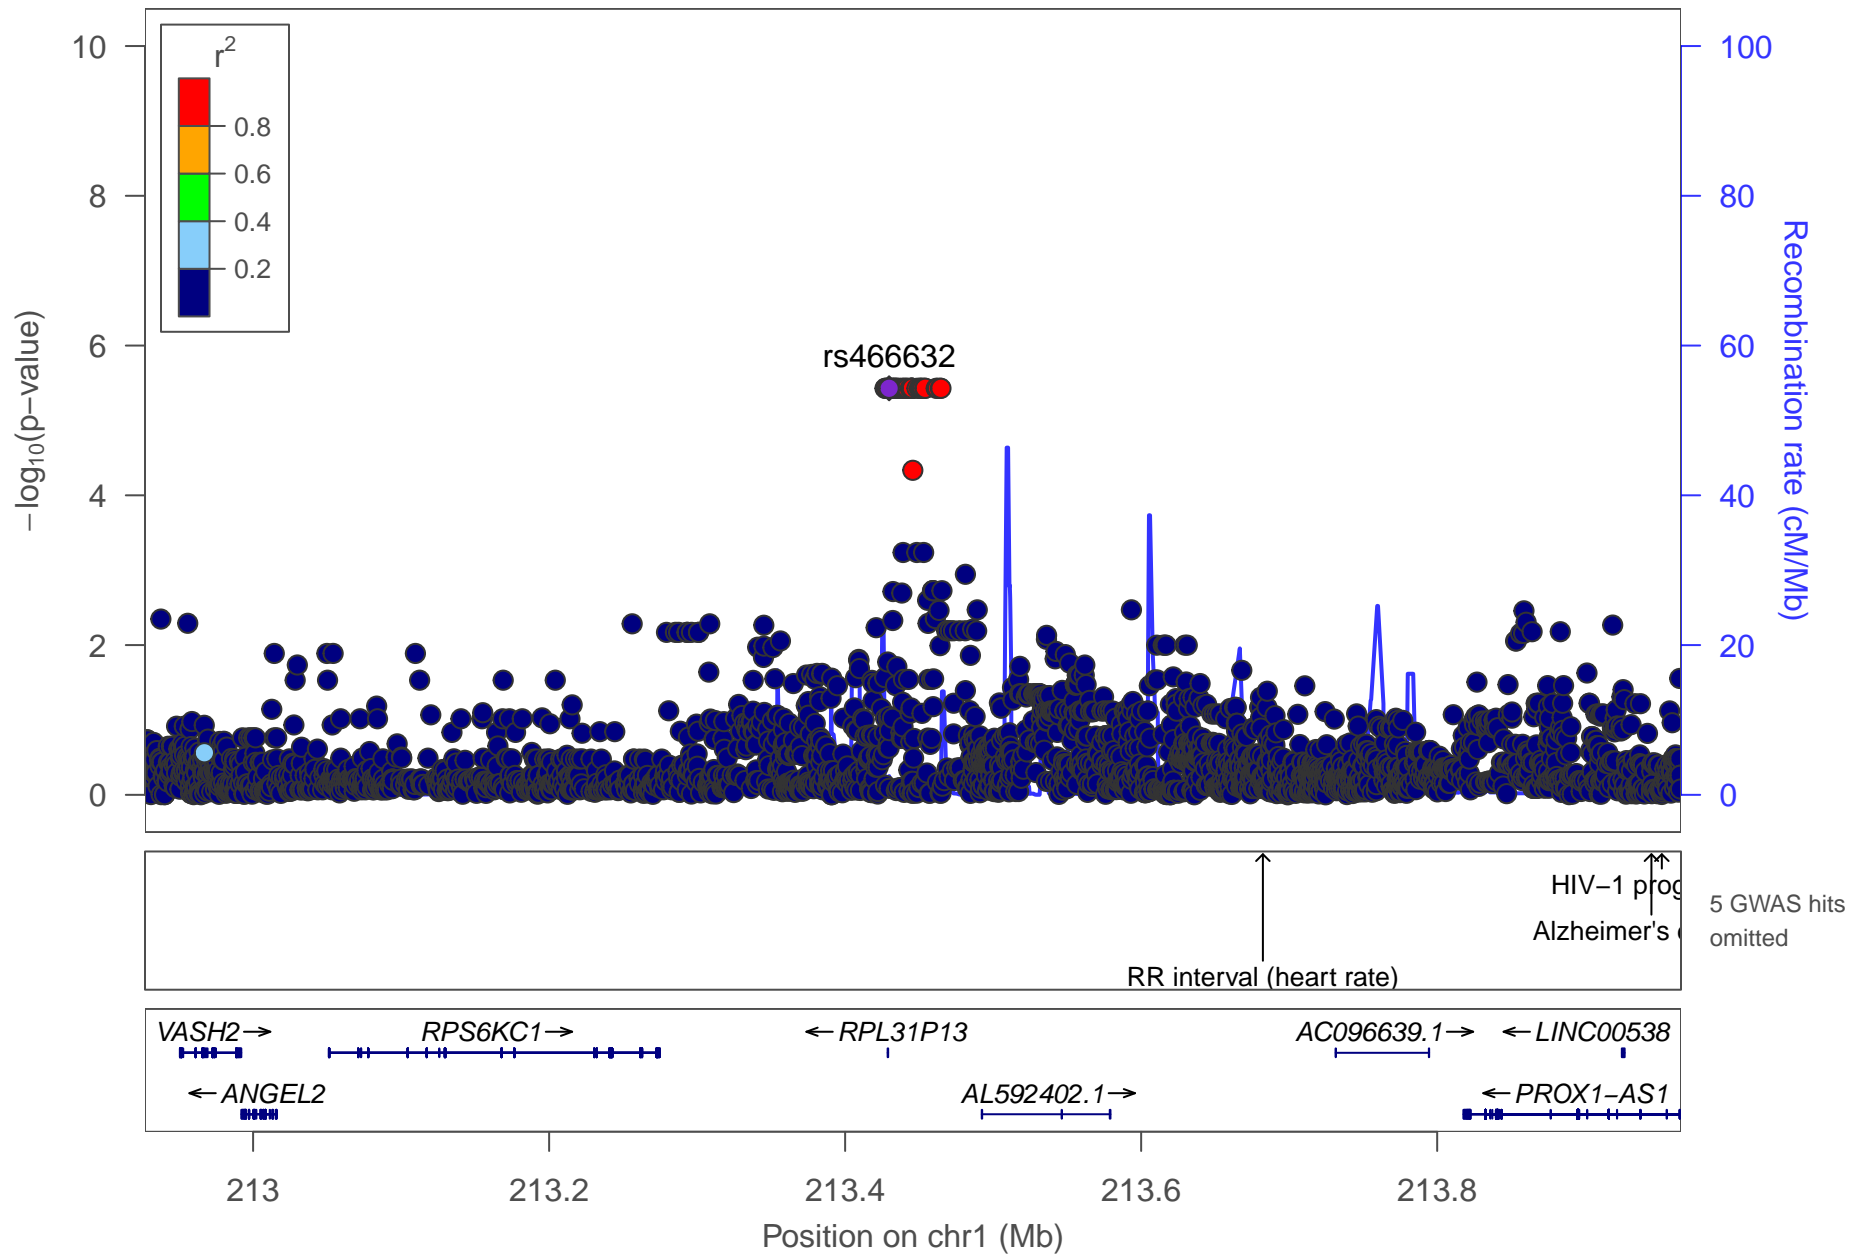

date: Thu Oct 20 22:13:35 2022

build: hg38

display range: chr1:212926960–213964736 [212926960–213964736]

hilite range: 0 – 0 [ 0 – 0 ]

reference SNP: chr1:213429709

number of SNPs plotted: 2696

min P-value: 3.72E–6 [chr1:213426960]

max P-value: 9.99E–1 [chr1:213699057]

omitted GWAS Hits: NA, NA

omitted GWAS Hits: NA, NA

## GWAS Catalog SNPs in Region

| <b>chr</b> | <b>pos (Mb)</b> | <b>trait</b>                       | <b>snp</b>  |
|------------|-----------------|------------------------------------|-------------|
| 1          | 212.9532        | Eye color                          | rs3002288   |
| 1          | 213.4245        | Suicide                            | rs320461    |
| 1          | 213.6613        | Metabolite levels (5-HIAA)         | rs4655303   |
| 1          | 213.6822        | RR interval (heart rate)           | rs17706439  |
| 1          | 213.7372        | Obesity                            | rs1704198   |
| 1          | 213.9324        | Post bronchodilator FEV1/FVC ratio | rs182234674 |
| 1          | 213.9447        | Alzheimer's disease                | rs340849    |
| 1          | 213.9518        | HIV-1 progression                  | rs17762192  |

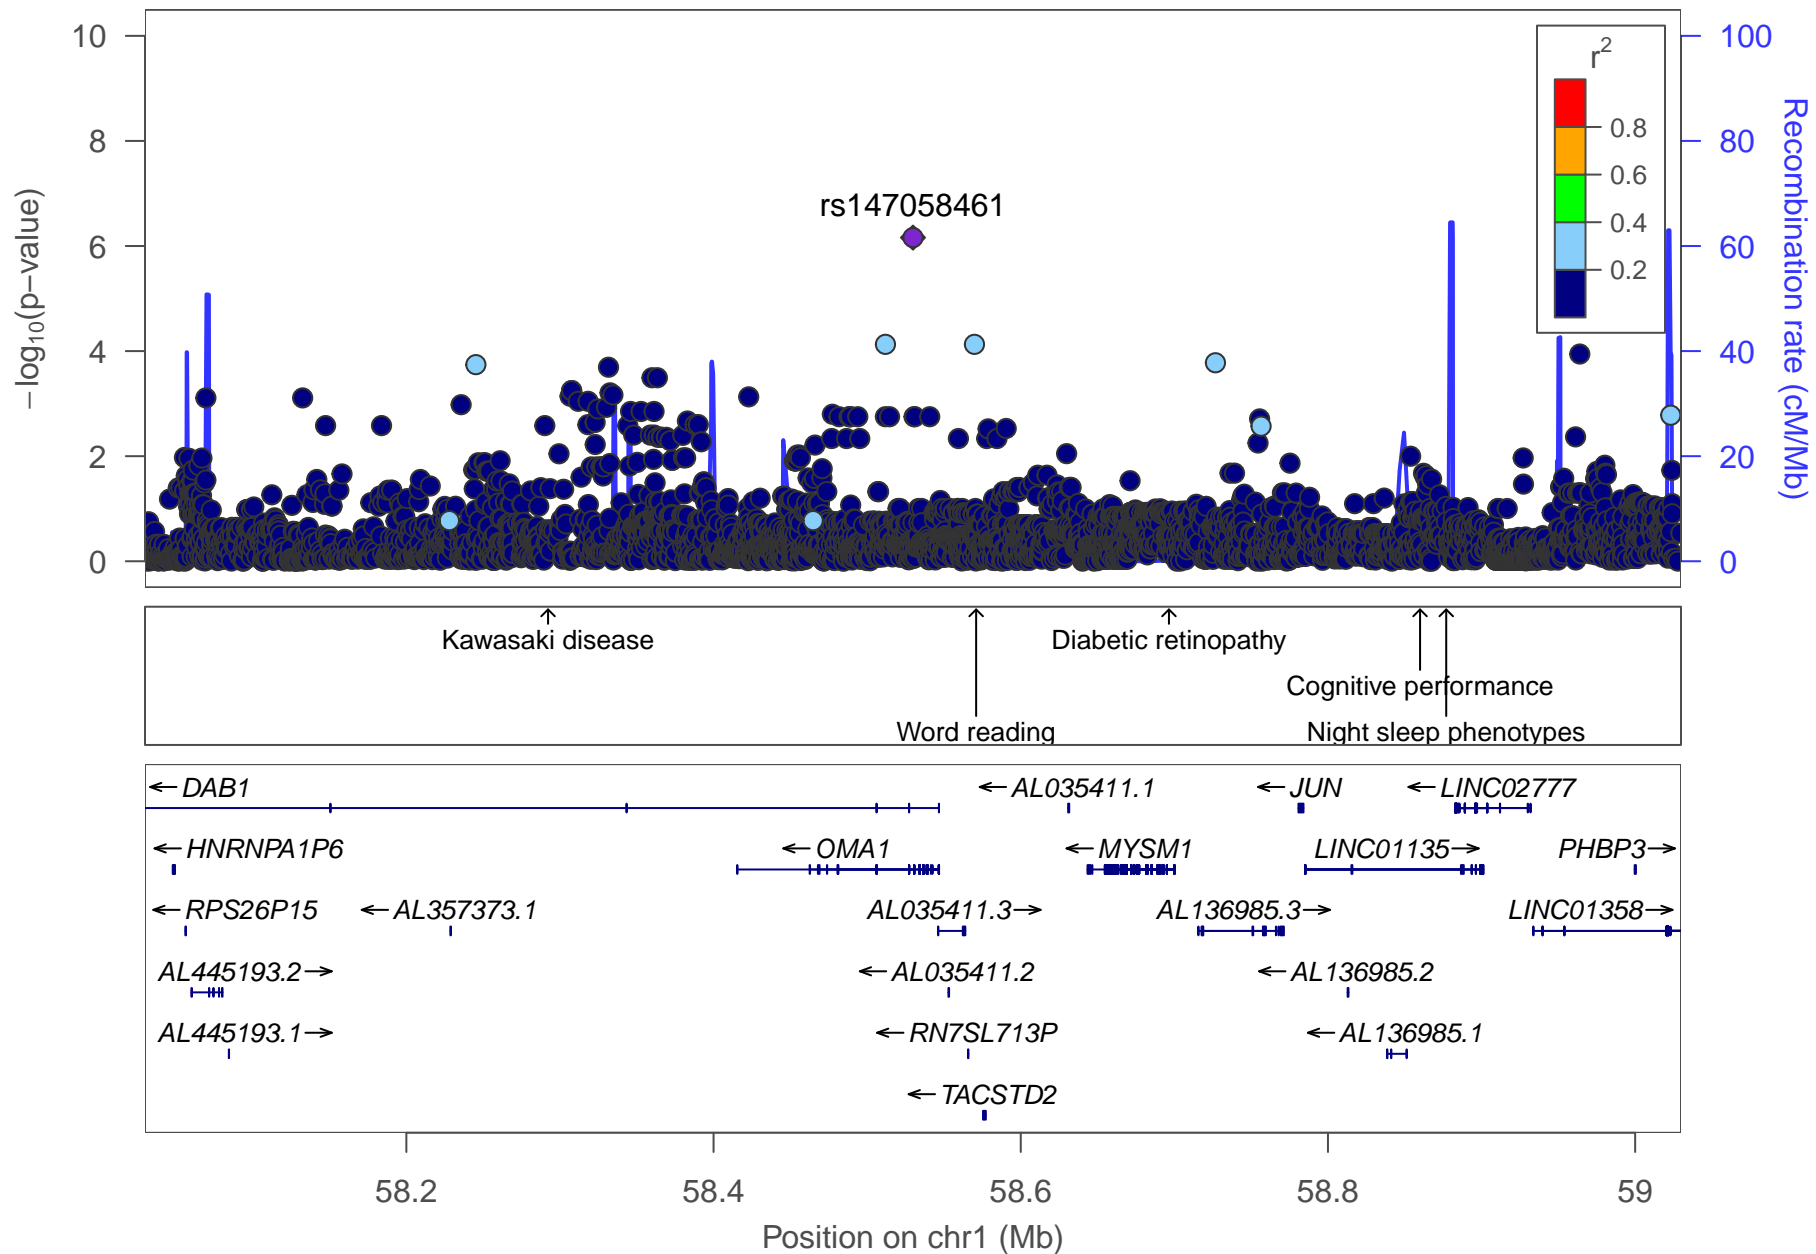

date: Thu Oct 20 22:11:28 2022

build: hg38

display range: chr1:58029837–59029837 [58029837–59029837]

hilite range: 0 – 0 [ 0 – 0 ]

reference SNP: chr1:58529837

number of SNPs plotted: 3805

min P-value: 6.92E-7 [chr1:58529837]

max P-value: 9.99E-1 [chr1:58484568]

## GWAS Catalog SNPs in Region

| <b>chr</b> | <b>pos (Mb)</b> | <b>trait</b>           | <b>snp</b> |
|------------|-----------------|------------------------|------------|
| 1          | 58.29224        | Kawasaki disease       | rs527409   |
| 1          | 58.57095        | Word reading           | rs638065   |
| 1          | 58.69648        | Diabetic retinopathy   | rs2811893  |
| 1          | 58.85995        | Cognitive performance  | rs4601609  |
| 1          | 58.87699        | Night sleep phenotypes | rs2764894  |

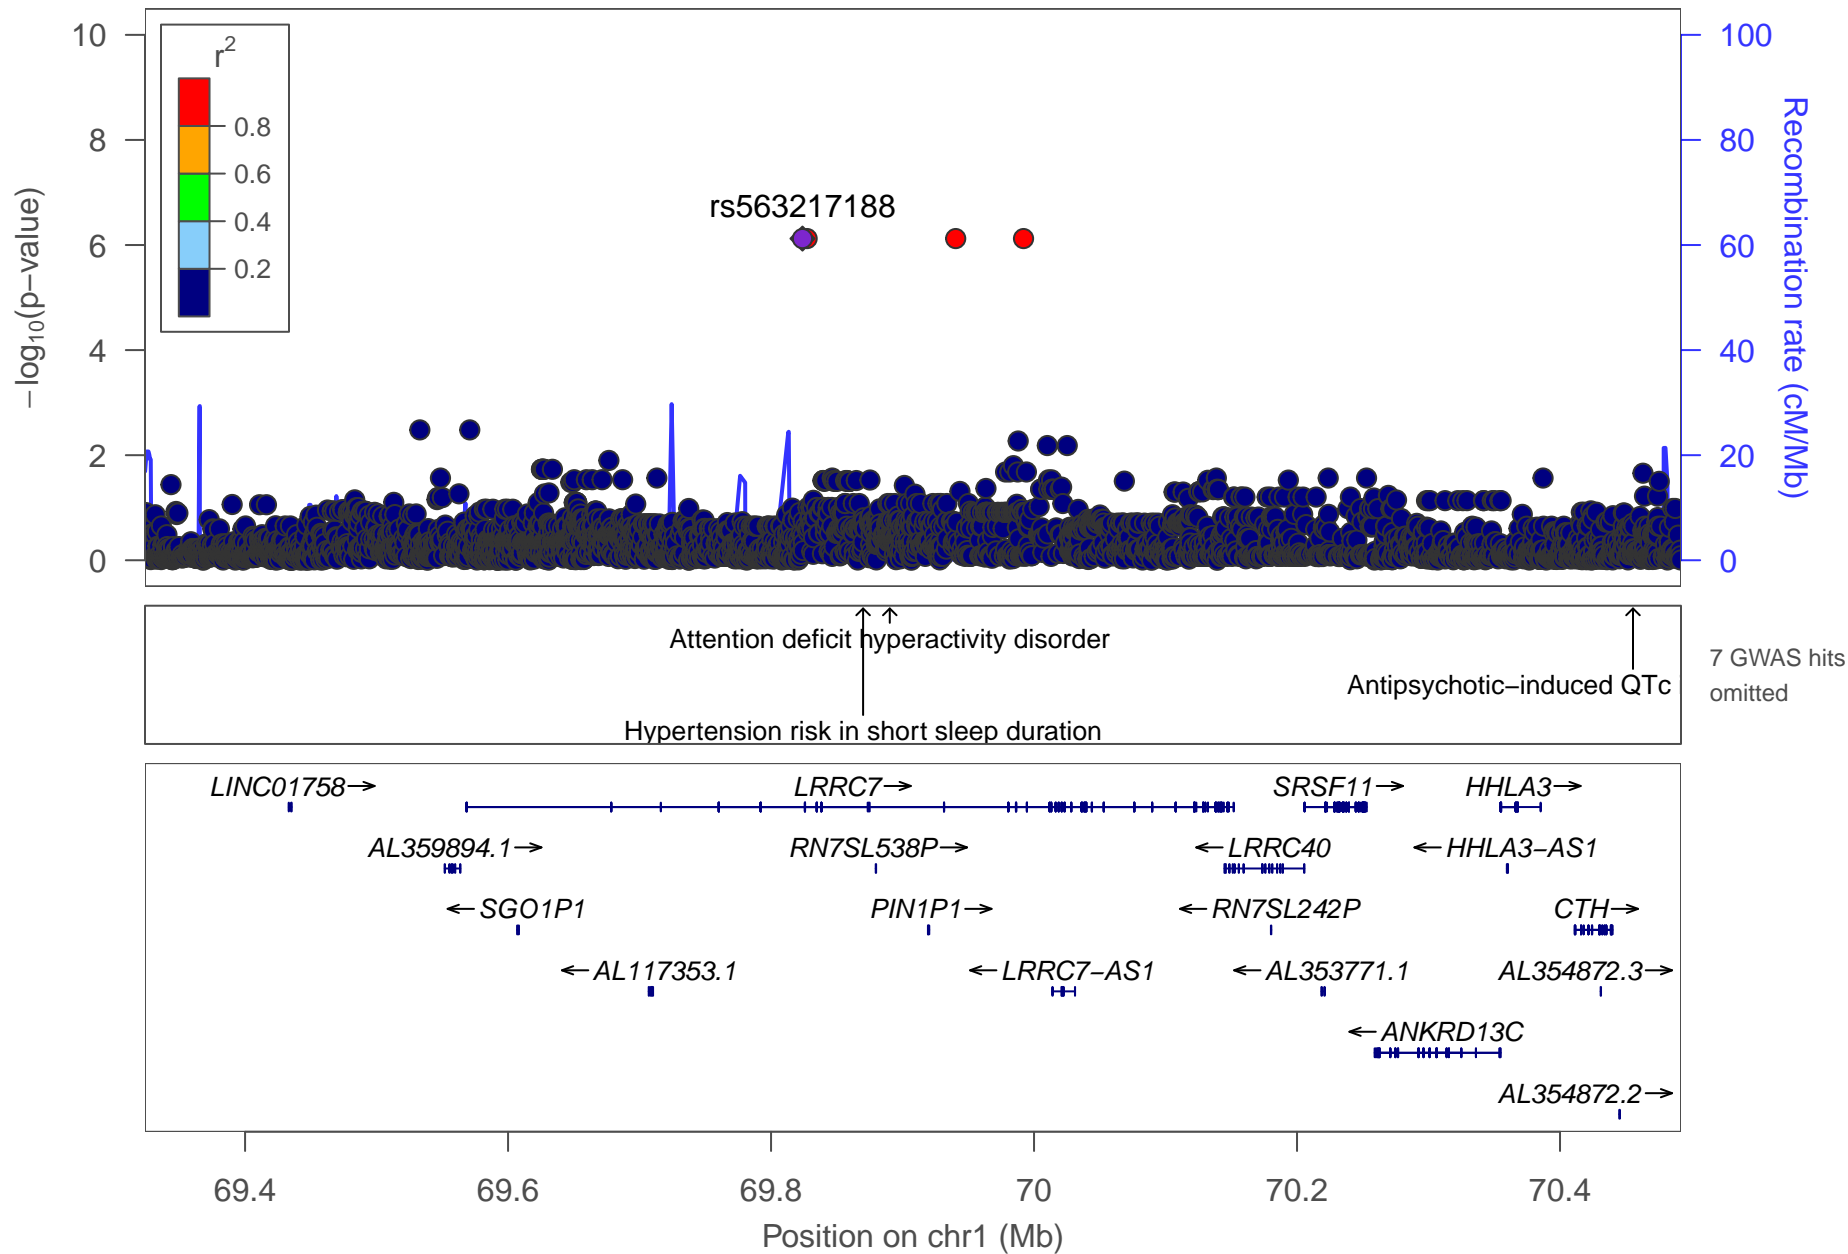



date: Thu Oct 20 22:13:35 2022

build: hg38

display range: chr1:69323901–70492002 [69323901–70492002]

hilite range: 0 – 0 [ 0 – 0 ]

reference SNP: chr1:69823901

number of SNPs plotted: 3484

min P-value:  $7.54E-7$  [chr1:69823901]

max P-value:  $10E-1$  [chr1:70139284]

omitted GWAS Hits: NA, NA

omitted GWAS Hits: NA, NA

omitted GWAS Hits: NA

GWAS Catalog SNPs in Region

| chr | pos (Mb) | trait                                                                                             | snp         |
|-----|----------|---------------------------------------------------------------------------------------------------|-------------|
| 1   | 69.48402 | Post bronchodilator FEV1/FVC ratio                                                                | rs138006855 |
| 1   | 69.61911 | Cannabis use (initiation)                                                                         | rs11809230  |
| 1   | 69.68218 | Cannabis use (age at onset)                                                                       | rs181704351 |
| 1   | 69.68876 | Orofacial clefts                                                                                  | rs1417437   |
| 1   | 69.74140 | Body mass index                                                                                   | rs10889850  |
| 1   | 69.87000 | Hypertension risk in short sleep duration                                                         | rs2226284   |
| 1   | 69.89030 | Attention deficit hyperactivity disorder                                                          | rs12037173  |
| 1   | 69.93886 | Obesity-related traits                                                                            | rs1023008   |
| 1   | 70.42142 | Adverse response to chemotherapy in breast cancer (alopecia) (cyclophosphamide+doxorubicin+/-5FU) | rs672203    |
| 1   | 70.45549 | Antipsychotic-induced QTc interval prolongation                                                   | rs10458561  |

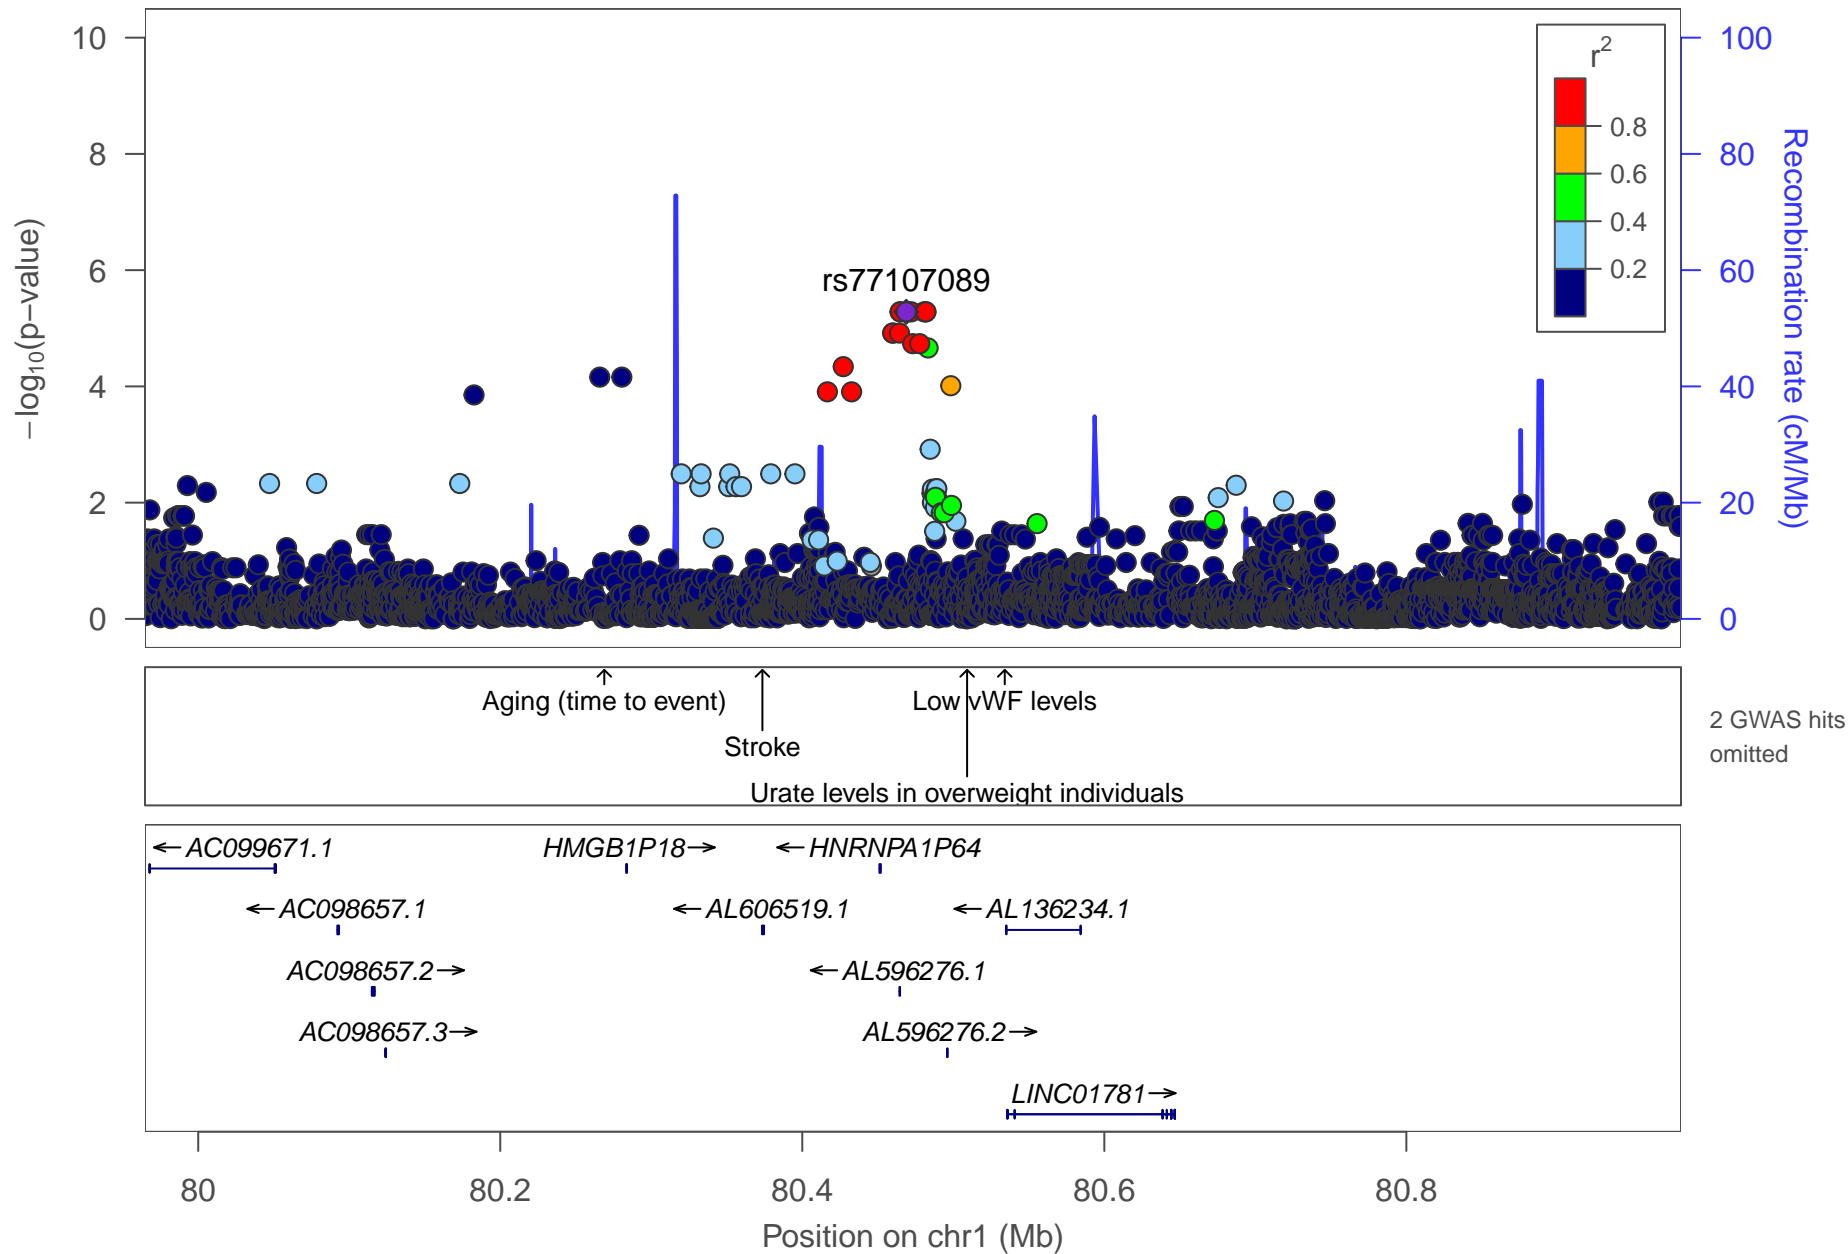

date: Thu Oct 20 22:13:35 2022

build: hg38

display range: chr1:79964760–80981863 [79964760–80981863]

hilite range: 0 – 0 [ 0 – 0 ]

reference SNP: chr1:80468831

number of SNPs plotted: 3916

min P-value: 5.21E–6 [chr1:80464760]

max P-value: 10E–1 [chr1:80809206]

omitted GWAS Hits: chr1:80.534074–Low vWF levels, NA

## GWAS Catalog SNPs in Region

| <b>chr</b> | <b>pos (Mb)</b> | <b>trait</b>                            | <b>snp</b> |
|------------|-----------------|-----------------------------------------|------------|
| 1          | 80.01220        | Obesity-related traits                  | rs10493631 |
| 1          | 80.26890        | Aging (time to event)                   | rs11162963 |
| 1          | 80.37359        | Stroke                                  | rs1937787  |
| 1          | 80.44543        | Estradiol plasma levels (breast cancer) | rs12118390 |
| 1          | 80.50914        | Urate levels in overweight individuals  | rs7539892  |
| 1          | 80.53407        | Low vWF levels                          | rs17398299 |

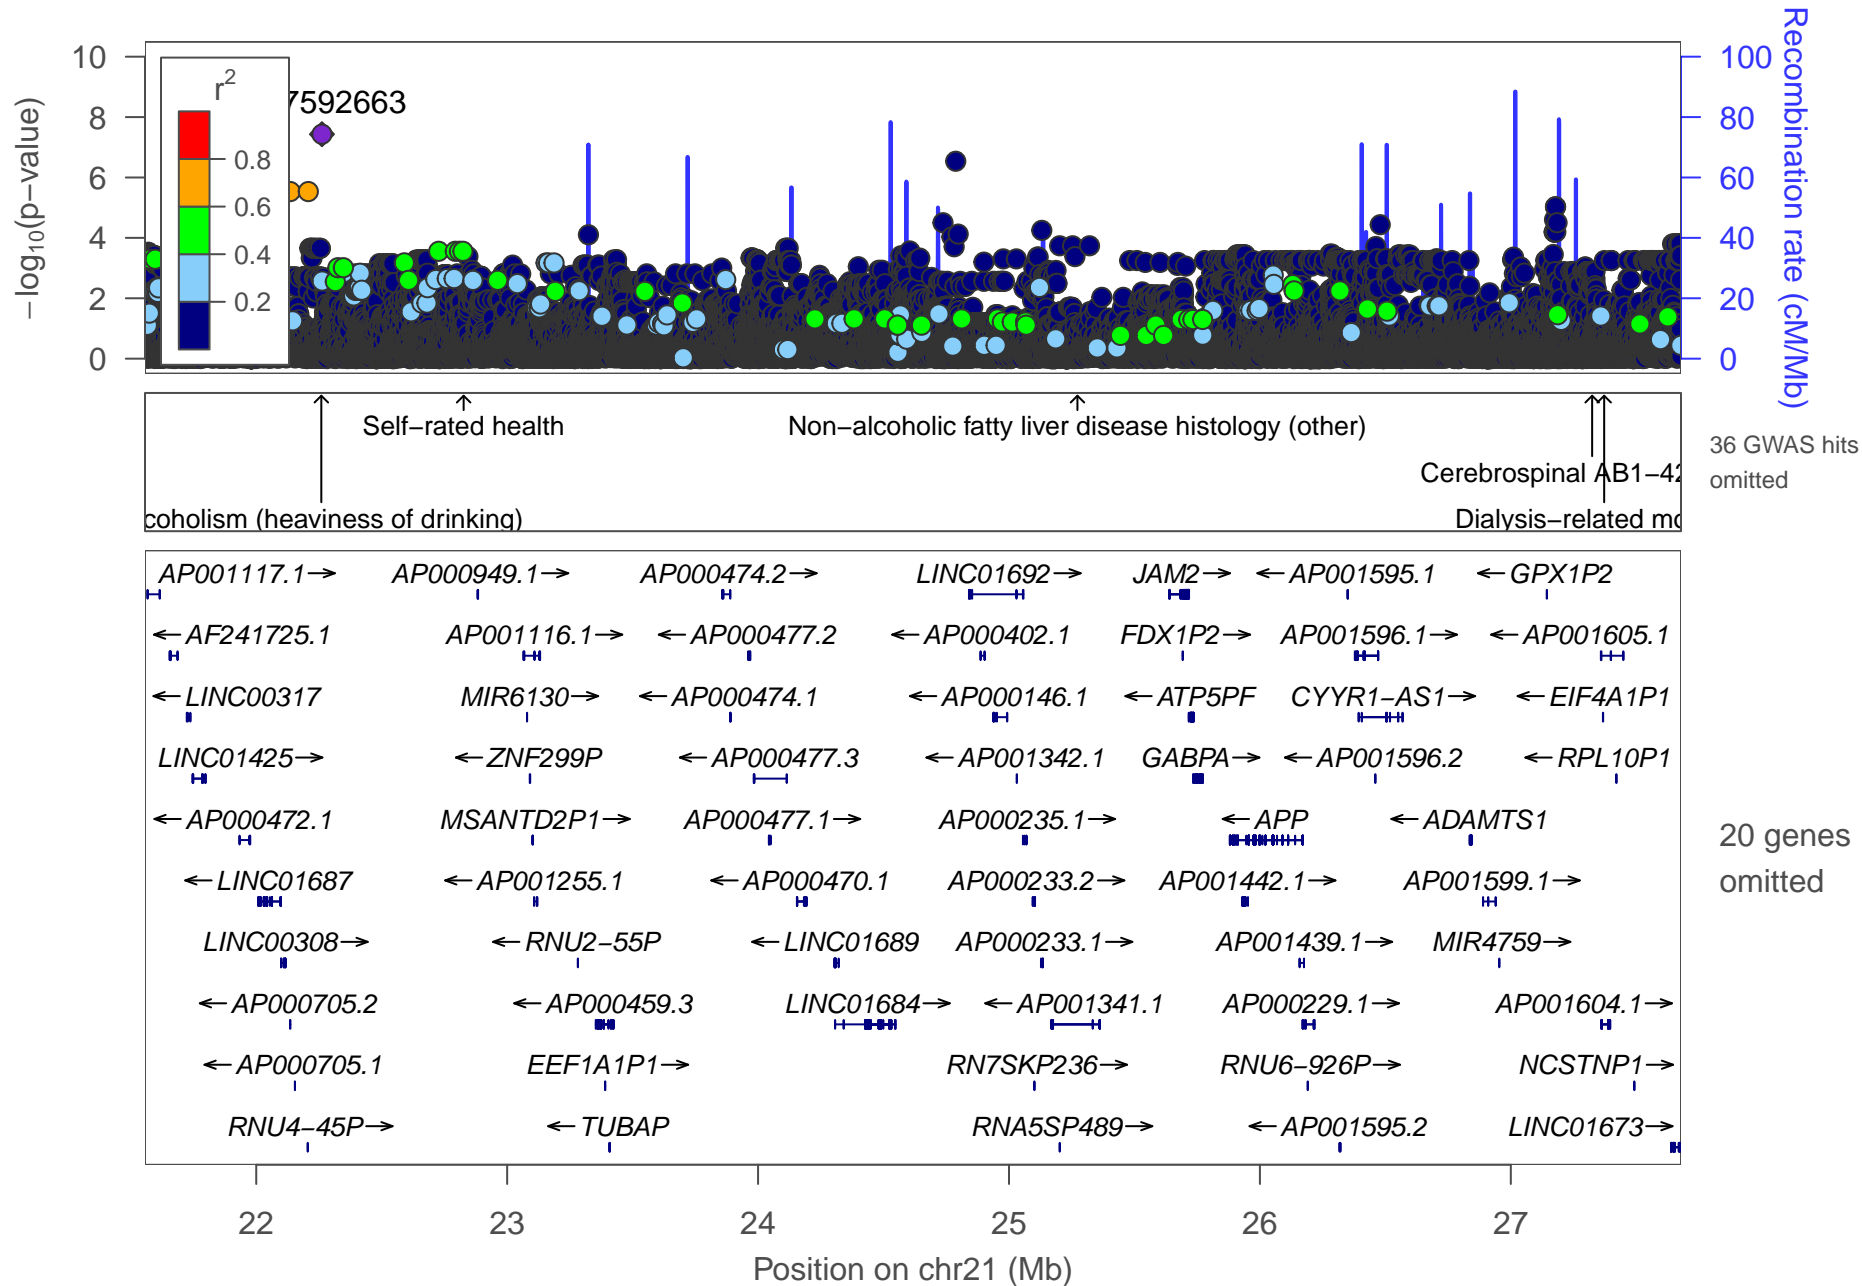

date: Thu Oct 20 22:13:41 2022

build: hg38

display range: chr21:21556609–27678240 [21556609–27678240]

hilite range: 0 – 0 [ 0 – 0 ]

reference SNP: chr21:22261900

number of SNPs plotted: 27061

min P-value: 3.69E–8 [chr21:22261900]

max P-value: 10E–1 [chr21:21980712]

omitted Genes: AP000561.1, MAPK6P2, AP000959.1

omitted Genes: AP000459.1, AP000459.2, AP000961.1

omitted Genes: RPL13AP7, AP001340.1, LINC00158

omitted Genes: AP000221.1, MIR155HG, MIR155

omitted Genes: AP000223.1, MRPL39, RNGTTP1

omitted Genes: AP000224.1, LLPHP2, RNU6–123P

omitted Genes: CYYR1, ADAMTS5

omitted GWAS Hits: NA, NA

Make more plots at <http://csg.sph.umich.edu/locuszoom/>

omitted GWAS Hits: NA, NA

GWAS Catalog SNPs in Region

| chr | pos (Mb) | trait                                                                                | snp        |
|-----|----------|--------------------------------------------------------------------------------------|------------|
| 21  | 21.66078 | Parental longevity (combined parental age at death)                                  | rs11088872 |
| 21  | 21.76953 | Dysphagia                                                                            | rs2226441  |
| 21  | 21.77228 | Dysphagia                                                                            | rs2827025  |
| 21  | 21.77363 | Diisocyanate-induced asthma                                                          | rs2014791  |
| 21  | 21.77912 | Asthma                                                                               | rs7281353  |
| 21  | 21.77912 | Asthma (childhood onset)                                                             | rs7281353  |
| 21  | 22.25936 | Alcoholism (heaviness of drinking)                                                   | rs2827312  |
| 21  | 22.82649 | Self-rated health                                                                    | rs7279441  |
| 21  | 23.04818 | Colorectal or endometrial cancer                                                     | rs4816890  |
| 21  | 23.73289 | Schizophrenia                                                                        | rs2828478  |
| 21  | 23.77080 | Major depressive disorder                                                            | rs2828520  |
| 21  | 24.06519 | Urinary albumin-to-creatinine ratio                                                  | rs2828785  |
| 21  | 24.54093 | Alzheimer's disease in APOE e4+ carriers                                             | rs721146   |
| 21  | 25.27277 | Non-alcoholic fatty liver disease histology (other)                                  | rs9977253  |
| 21  | 25.45420 | Adverse response to chemotherapy (neutropenia/leucopenia) (all antimetabolite drugs) | rs8127977  |
| 21  | 25.45746 | Parasitemia in Tripanosoma cruzi seropositivity                                      | rs12483240 |
| 21  | 25.63006 | Cognitive performance                                                                | rs17001239 |
| 21  | 25.69203 | Longitudinal change in brain amyloid plaque burden                                   | rs8129913  |
| 21  | 26.34434 | Airflow obstruction                                                                  | rs9975851  |
| 21  | 26.49984 | Response to exercise (triglyceride levels)                                           | rs222158   |
| 21  | 26.76949 | Parental extreme longevity (95 years and older)                                      | rs73185805 |



GWAS Catalog SNPs in Region

| chr | pos (Mb) | trait                                        | snp         |
|-----|----------|----------------------------------------------|-------------|
| 21  | 26.77387 | Metabolite levels (HVA)                      | rs2830487   |
| 21  | 26.77387 | Metabolite levels (HVA–5–HIAA Factor score)  | rs2830487   |
| 21  | 27.28563 | Liver enzyme levels (aspartate transaminase) | rs457603    |
| 21  | 27.29303 | Response to citalopram treatment             | rs2830840   |
| 21  | 27.32416 | Cerebrospinal AB1–42 levels                  | rs239713    |
| 21  | 27.36268 | Dialysis–related mortality                   | rs9977499   |
| 21  | 27.37204 | Dialysis–related mortality                   | rs1452093   |
| 21  | 27.45794 | Post bronchodilator FEV1/FVC ratio           | rs147130662 |
| 21  | 27.46976 | Post bronchodilator FEV1/FVC ratio           | rs139916902 |
| 21  | 27.48792 | Post bronchodilator FEV1/FVC ratio           | rs142181472 |
| 21  | 27.51337 | Post bronchodilator FEV1                     | rs142429672 |
| 21  | 27.51337 | Post bronchodilator FEV1/FVC ratio           | rs142429672 |
| 21  | 27.51781 | Daytime sleep phenotypes                     | rs242364    |
| 21  | 27.51811 | Post bronchodilator FEV1                     | rs141838403 |
| 21  | 27.51811 | Post bronchodilator FEV1/FVC ratio           | rs141838403 |
| 21  | 27.54562 | Post bronchodilator FEV1                     | rs139202427 |
| 21  | 27.54562 | Post bronchodilator FEV1/FVC ratio           | rs139202427 |
| 21  | 27.55480 | Post bronchodilator FEV1                     | rs142976294 |
| 21  | 27.55480 | Post bronchodilator FEV1/FVC ratio           | rs142976294 |
| 21  | 27.57396 | Response to cytidine analogues (gemcitabine) | rs1598848   |

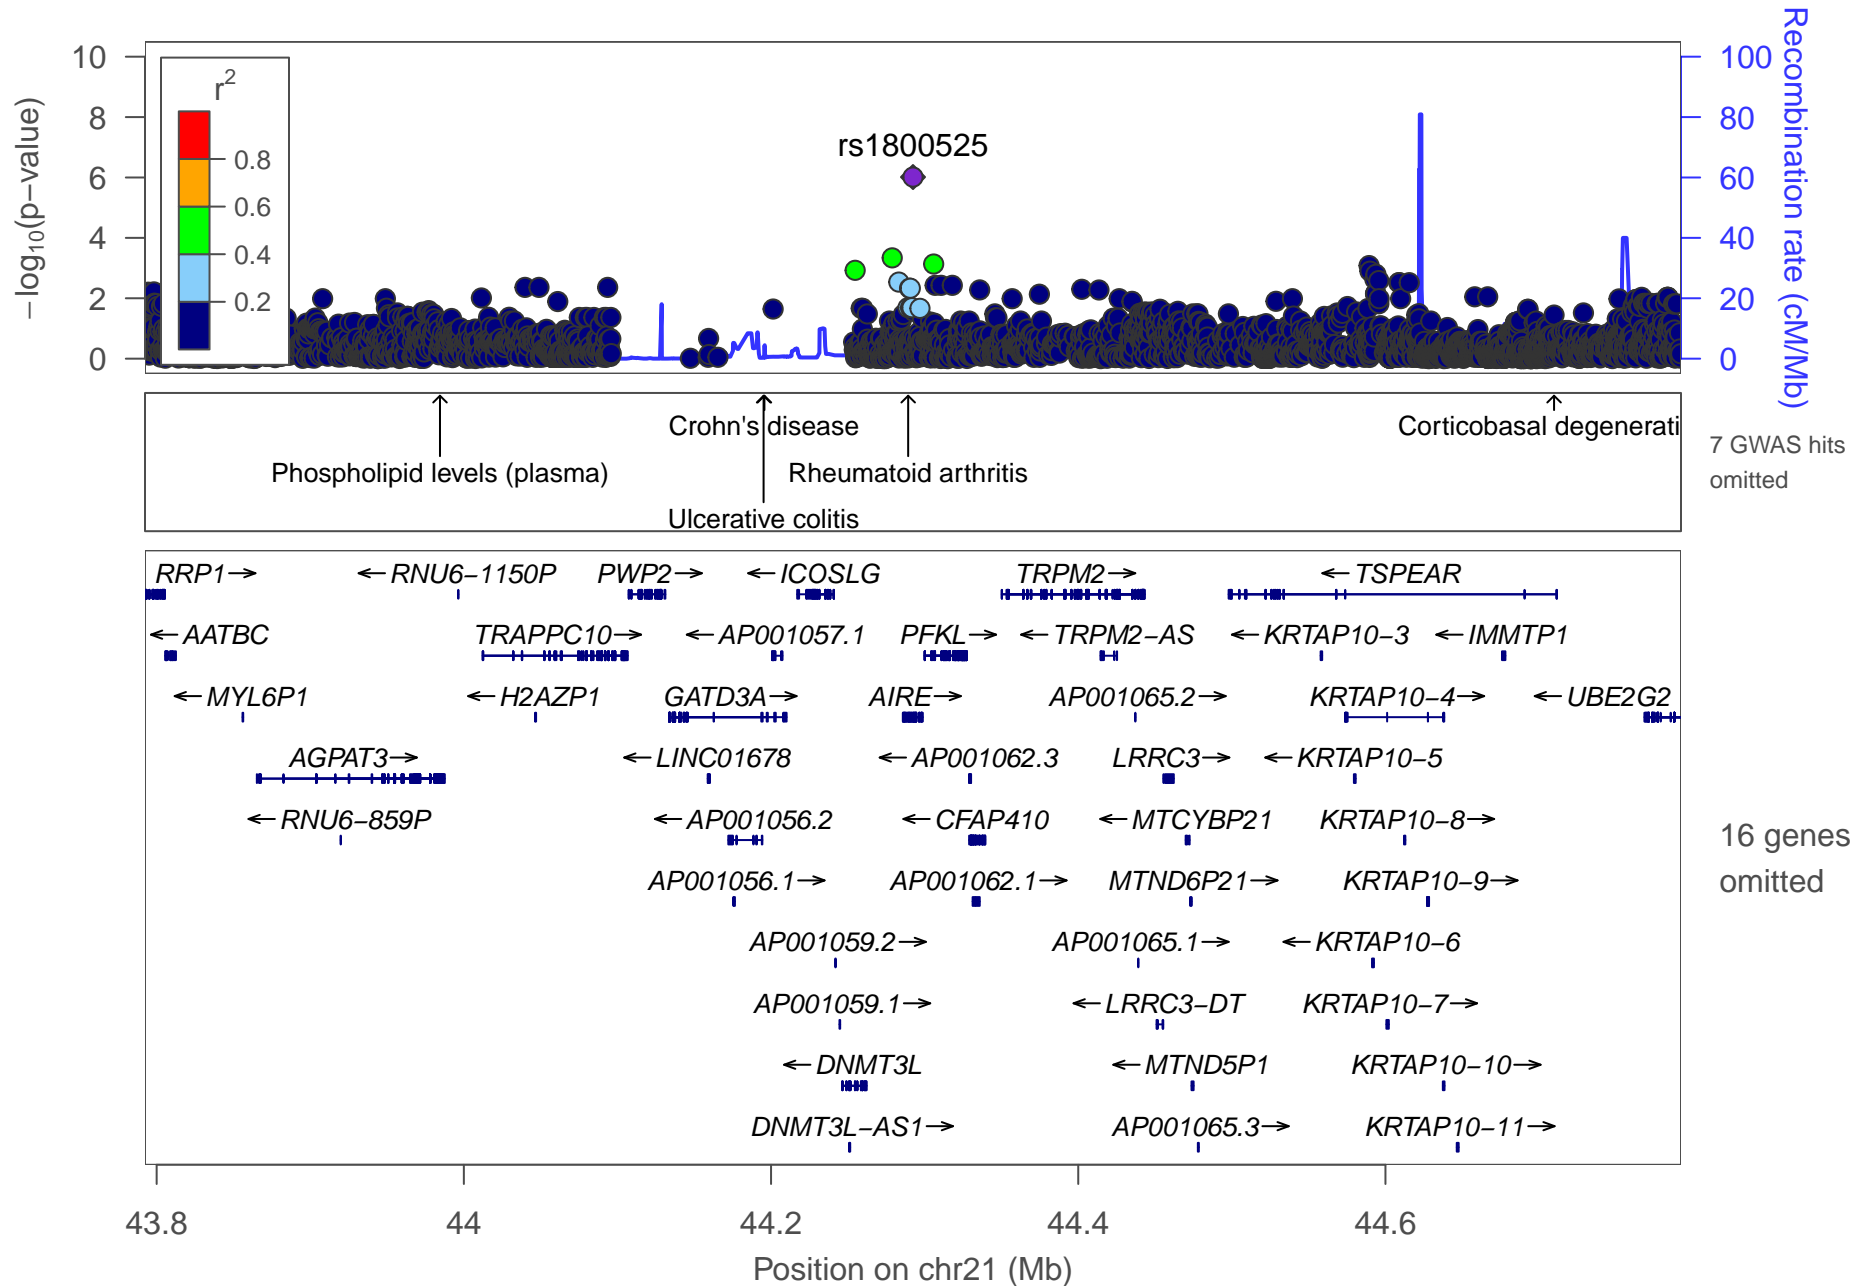

date: Thu Oct 20 22:13:35 2022

build: hg38

display range: chr21:43792407–44792407 [43792407–44792407]

hilite range: 0 – 0 [ 0 – 0 ]

reference SNP: chr21:44292407

number of SNPs plotted: 3120

min P-value: 9.68E–7 [chr21:44292407]

max P-value: 10E–1 [chr21:44689277]

omitted Genes: AP001062.2, AP001063.1, LINC02575

omitted Genes: AP001065.4, TSPEAR–AS1, TSPEAR–AS2

omitted Genes: AP001066.1, KRTAP10–1, KRTAP10–2

omitted Genes: KRTAP12–4, KRTAP12–3, KRTAP12–2

omitted Genes: KRTAP12–1, KRTAP12–6P, KRTAP10–12

omitted Genes: KRTAP10–13P

omitted GWAS Hits: chr21:44.709771–Corticobasal degeneration, NA

omitted GWAS Hits: NA, NA

omitted GWAS Hits: NA

## GWAS Catalog SNPs in Region

| <b>chr</b> | <b>pos (Mb)</b> | <b>trait</b>                 | <b>snp</b> |
|------------|-----------------|------------------------------|------------|
| 21         | 43.98446        | Phospholipid levels (plasma) | rs7435     |
| 21         | 44.19498        | Inflammatory bowel disease   | rs8127691  |
| 21         | 44.19514        | Ulcerative colitis           | rs2838519  |
| 21         | 44.19514        | Crohn's disease              | rs2838519  |
| 21         | 44.19568        | Crohn's disease              | rs762421   |
| 21         | 44.19586        | Ulcerative colitis           | rs7282490  |
| 21         | 44.19586        | Crohn's disease              | rs7282490  |
| 21         | 44.19586        | Inflammatory bowel disease   | rs7282490  |
| 21         | 44.22480        | Left ventricular QRS voltage | rs8131653  |
| 21         | 44.22754        | Celiac disease               | rs4819388  |
| 21         | 44.28927        | Rheumatoid arthritis         | rs2075876  |
| 21         | 44.70977        | Corticobasal degeneration    | rs875125   |

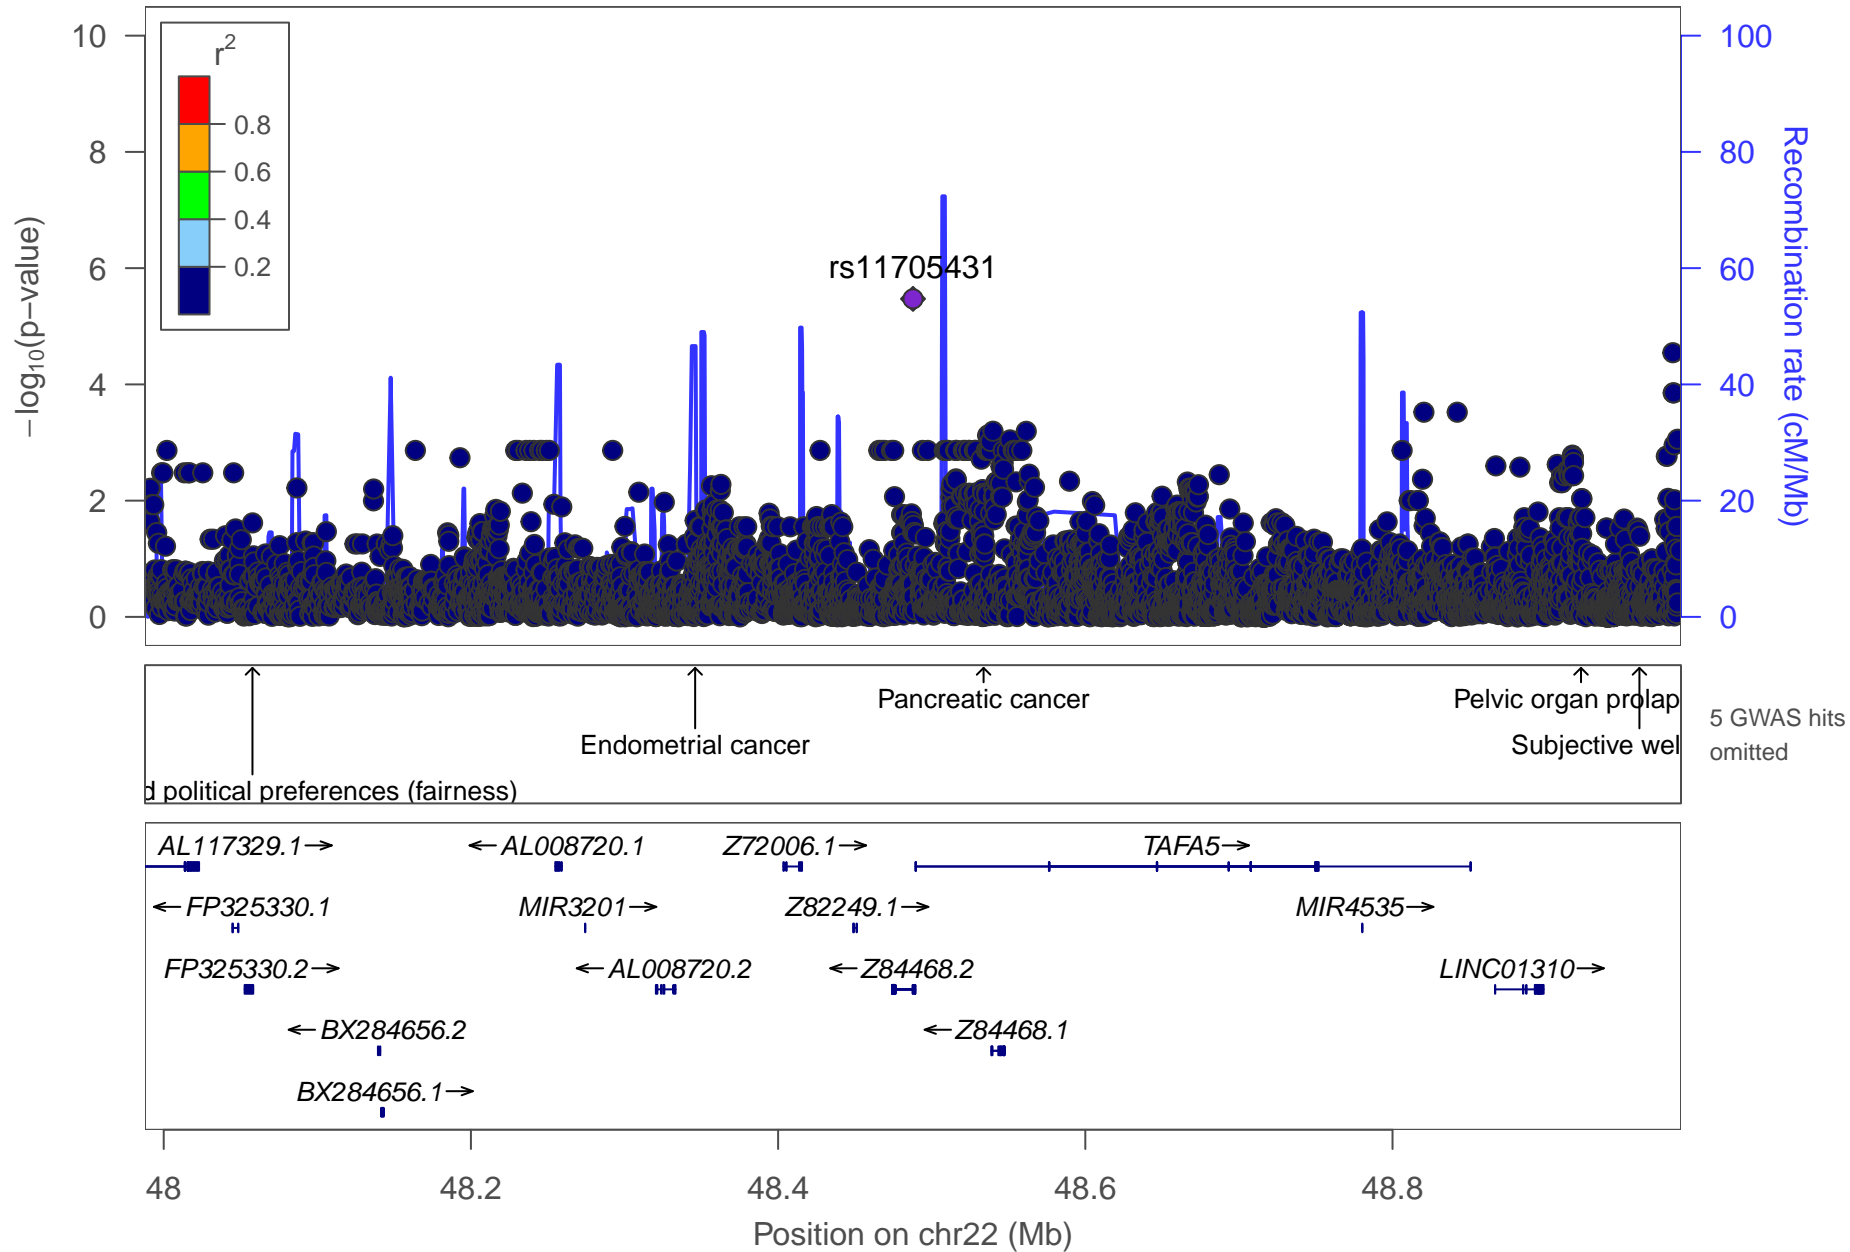

date: Thu Oct 20 22:13:36 2022

build: hg38

display range: chr22:47987809–48987809 [47987809–48987809]

hilite range: 0 – 0 [ 0 – 0 ]

reference SNP: chr22:48487809

number of SNPs plotted: 5946

min P-value: 3.38E–6 [chr22:48487809]

max P-value: 10E–1 [chr22:48705385]

omitted GWAS Hits: chr22:48.922714–Pelvic organ prolapse, chr22:48.960751–Subjective well-being

omitted GWAS Hits: NA, NA

## GWAS Catalog SNPs in Region

| <b>chr</b> | <b>pos (Mb)</b> | <b>trait</b>                                   | <b>snp</b>  |
|------------|-----------------|------------------------------------------------|-------------|
| 22         | 48.05777        | Economic and political preferences (fairness)  | rs117294    |
| 22         | 48.09884        | Alzheimer disease and age of onset             | rs150927461 |
| 22         | 48.23437        | Obesity-related traits                         | rs13054085  |
| 22         | 48.25619        | DNA methylation (variation)                    | rs1004689   |
| 22         | 48.34599        | Endometrial cancer                             | rs4407      |
| 22         | 48.49244        | Late-onset Alzheimer's disease                 | rs1034435   |
| 22         | 48.52765        | Bipolar disorder (body mass index interaction) | rs80088139  |
| 22         | 48.53376        | Pancreatic cancer                              | rs5768709   |
| 22         | 48.92271        | Pelvic organ prolapse                          | rs7290192   |
| 22         | 48.96075        | Subjective well-being                          | rs113959751 |

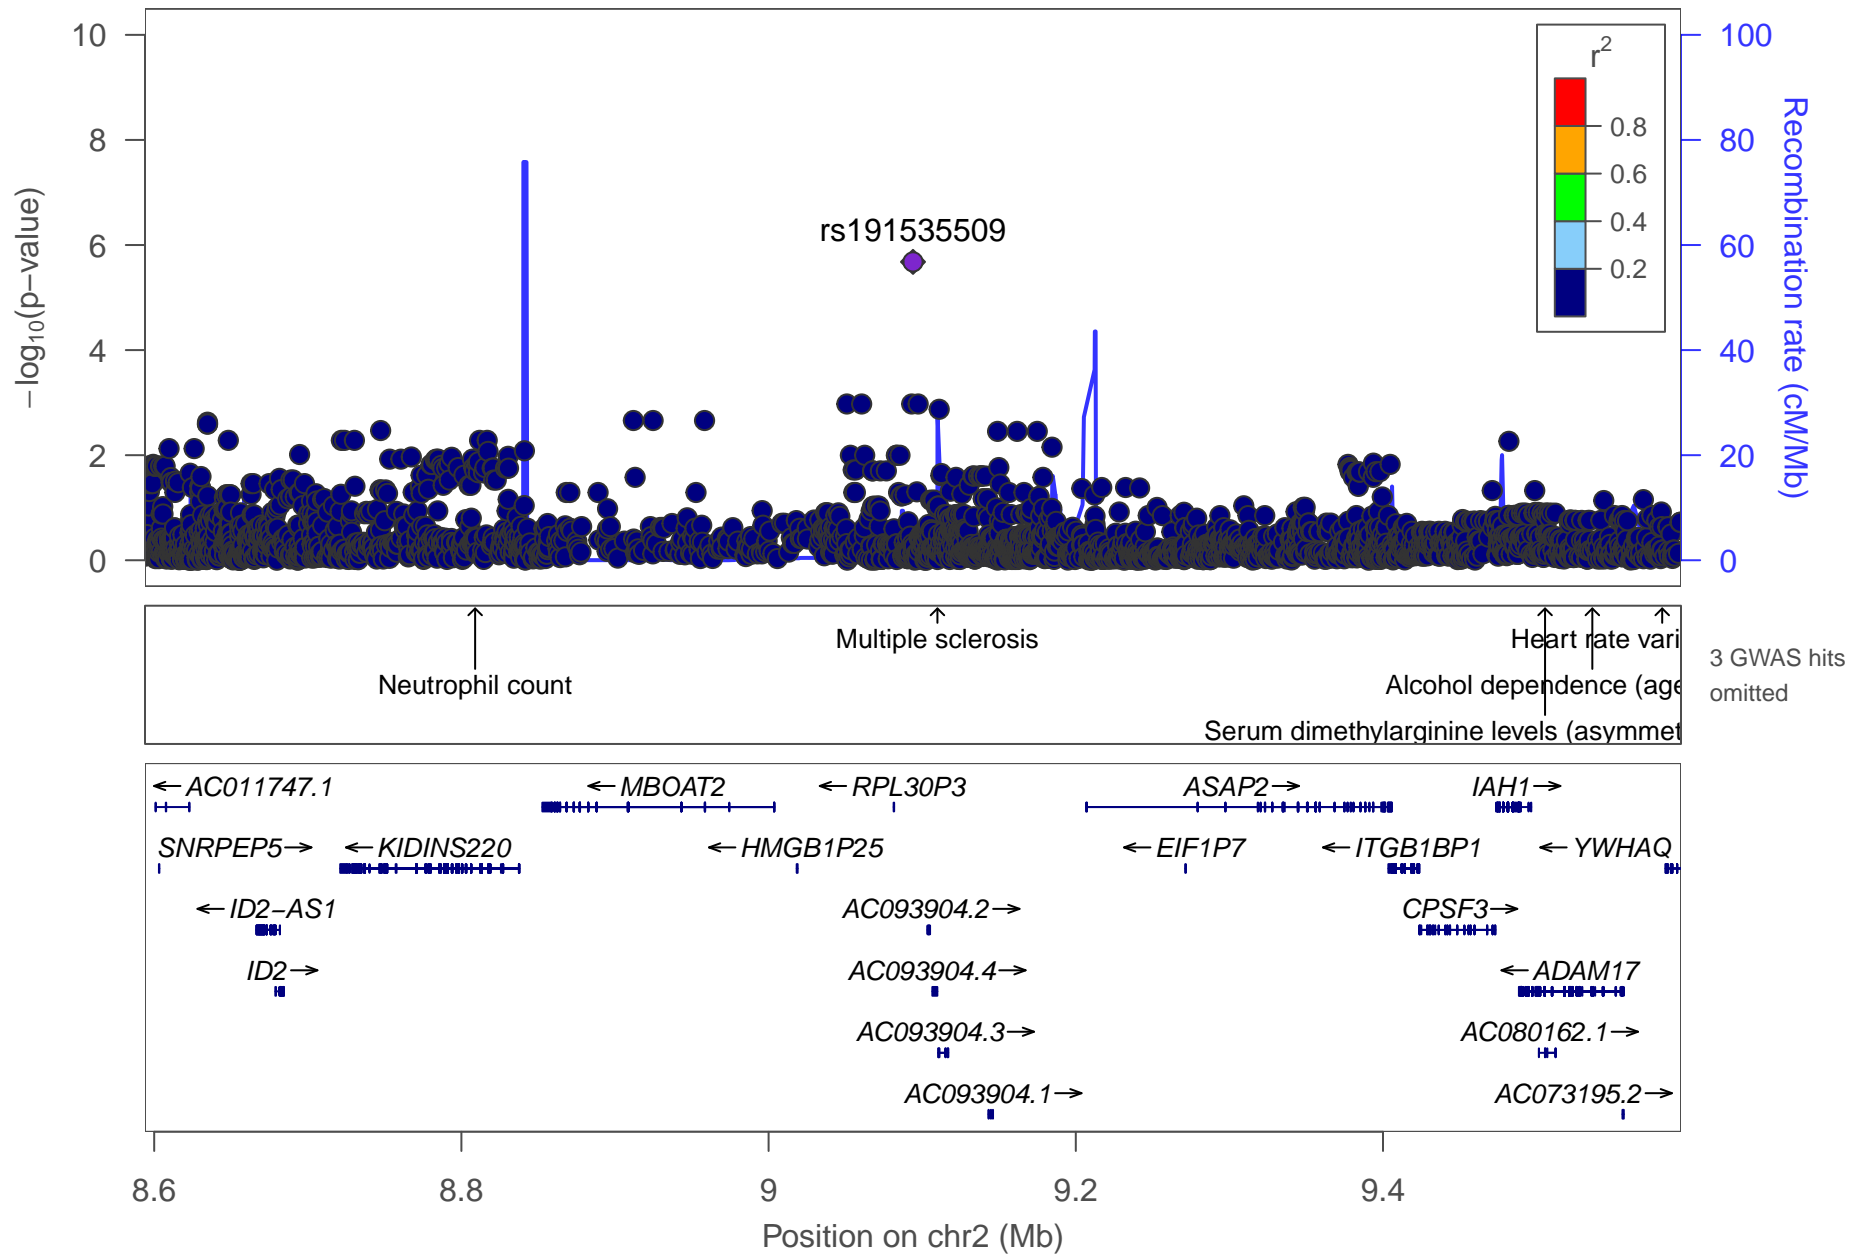



date: Thu Oct 20 22:13:33 2022

build: hg38

display range: chr2:8594003–9594003 [8594003–9594003]

hilite range: 0 – 0 [ 0 – 0 ]

reference SNP: chr2:9094003

number of SNPs plotted: 2572

min P-value: 2.09E–6 [chr2:9094003]

max P-value: 9.99E–1 [chr2:8622782]

omitted GWAS Hits: NA, NA

## GWAS Catalog SNPs in Region

| <b>chr</b> | <b>pos (Mb)</b> | <b>trait</b>                                               | <b>snp</b> |
|------------|-----------------|------------------------------------------------------------|------------|
| 2          | 8.598773        | Schizophrenia                                              | rs4669297  |
| 2          | 8.808940        | Neutrophil count                                           | rs7587928  |
| 2          | 9.109909        | Multiple sclerosis                                         | rs1109670  |
| 2          | 9.119469        | IgG glycosylation                                          | rs9636252  |
| 2          | 9.151105        | Diisocyanate-induced asthma                                | rs73912949 |
| 2          | 9.505503        | Serum dimethylarginine levels (asymmetric/symmetric ratio) | rs55794209 |
| 2          | 9.536284        | Alcohol dependence (age at onset)                          | rs17362650 |
| 2          | 9.581767        | Heart rate variability traits                              | rs6432018  |

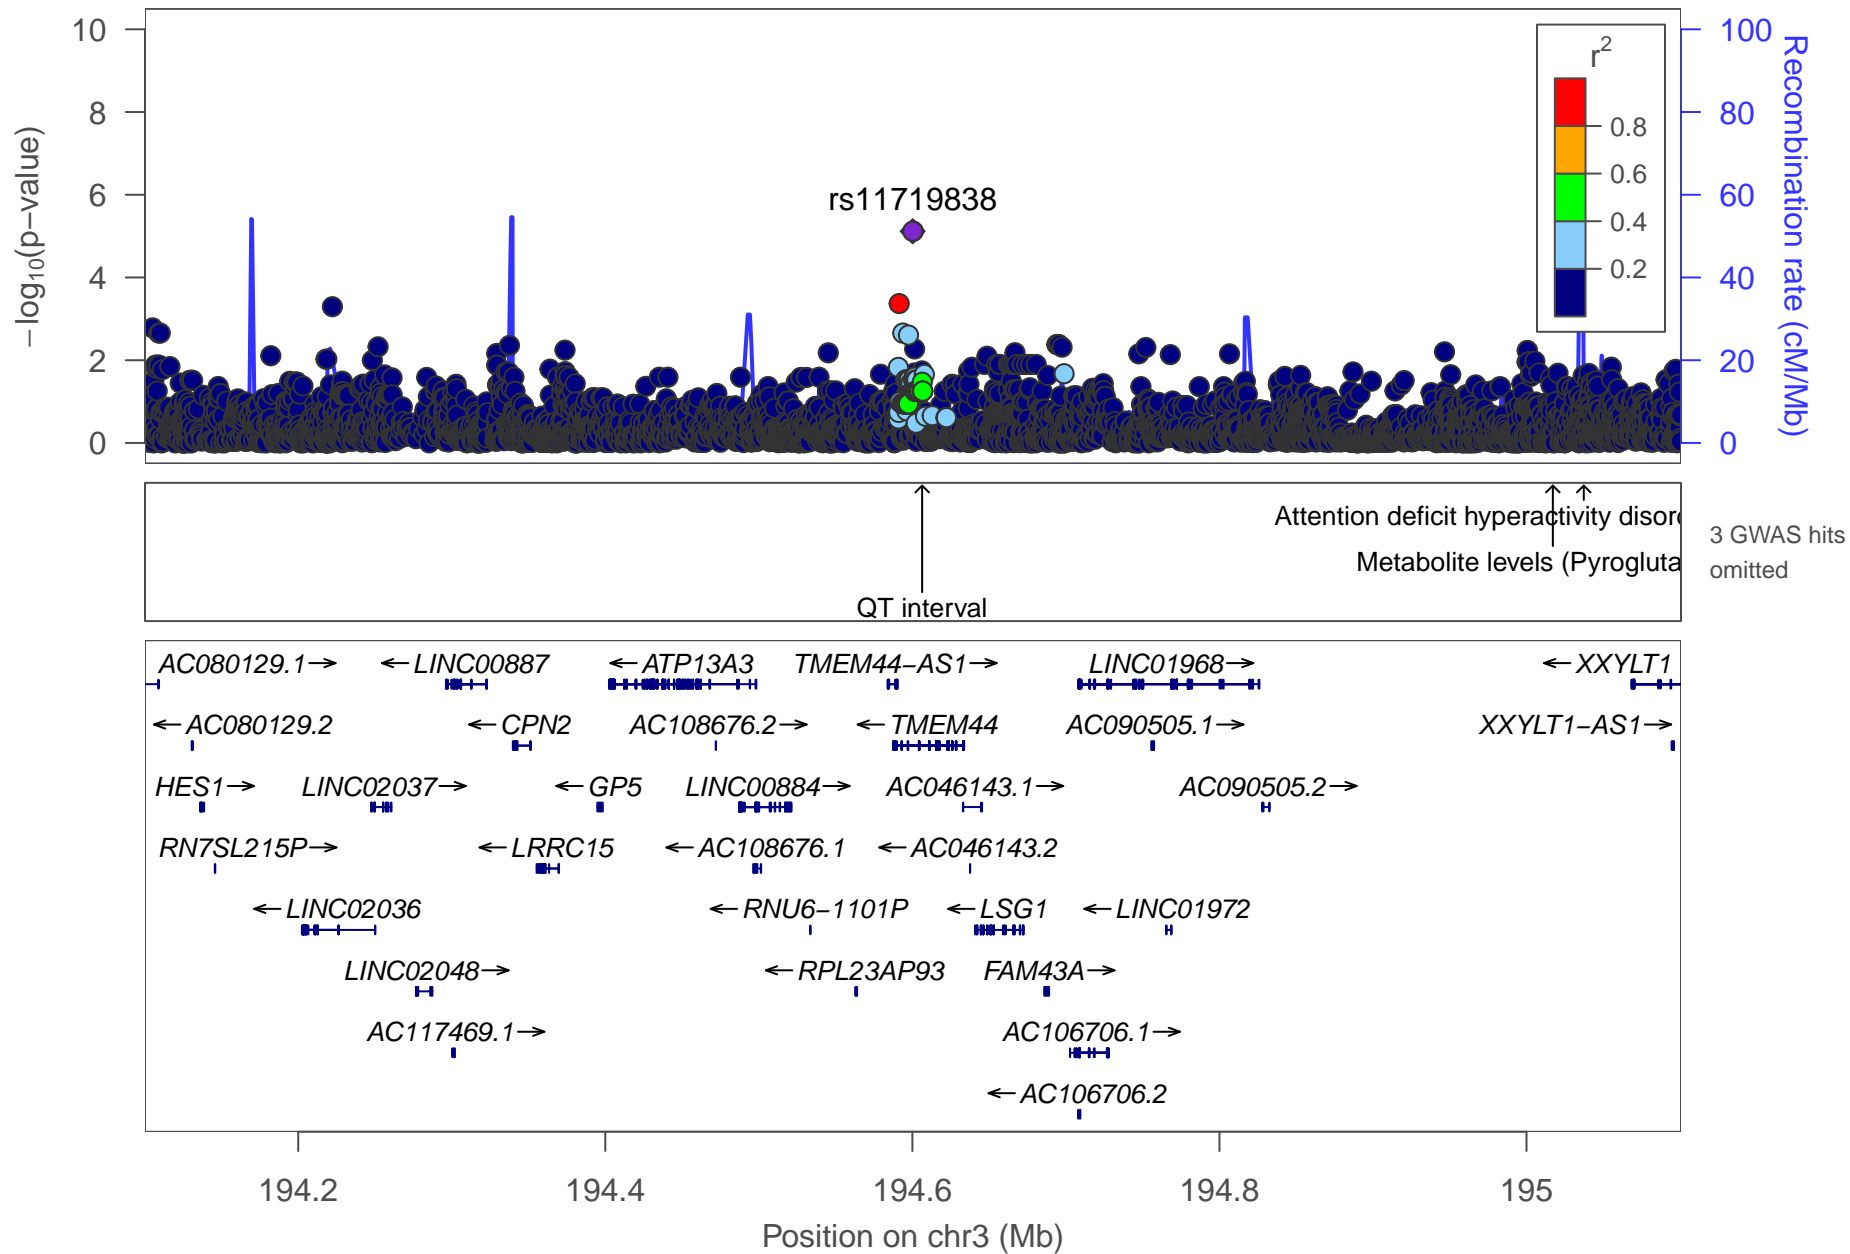

date: Thu Oct 20 22:13:36 2022

build: hg38

display range: chr3:194100199–195100608 [194100199–195100608]

hilite range: 0 – 0 [ 0 – 0 ]

reference SNP: chr3:194600199

number of SNPs plotted: 4921

min P-value: 7.63E–6 [chr3:194600199]

max P-value: 10E–1 [chr3:194346011]

omitted GWAS Hits: NA, NA

## GWAS Catalog SNPs in Region

| <b>chr</b> | <b>pos (Mb)</b> | <b>trait</b>                                                           | <b>snp</b>  |
|------------|-----------------|------------------------------------------------------------------------|-------------|
| 3          | 194.3098        | Mortality in sepsis                                                    | rs10933728  |
| 3          | 194.5172        | 3-hydroxypropylmercapturic acid levels in smokers                      | rs147484948 |
| 3          | 194.6064        | QT interval                                                            | rs789852    |
| 3          | 194.6852        | antipsychotic drug dosage in schizophrenia or schizoaffective disorder | rs789859    |
| 3          | 195.0171        | Metabolite levels (Pyroglutamine)                                      | rs2676917   |
| 3          | 195.0373        | Attention deficit hyperactivity disorder (time to onset)               | rs3892715   |

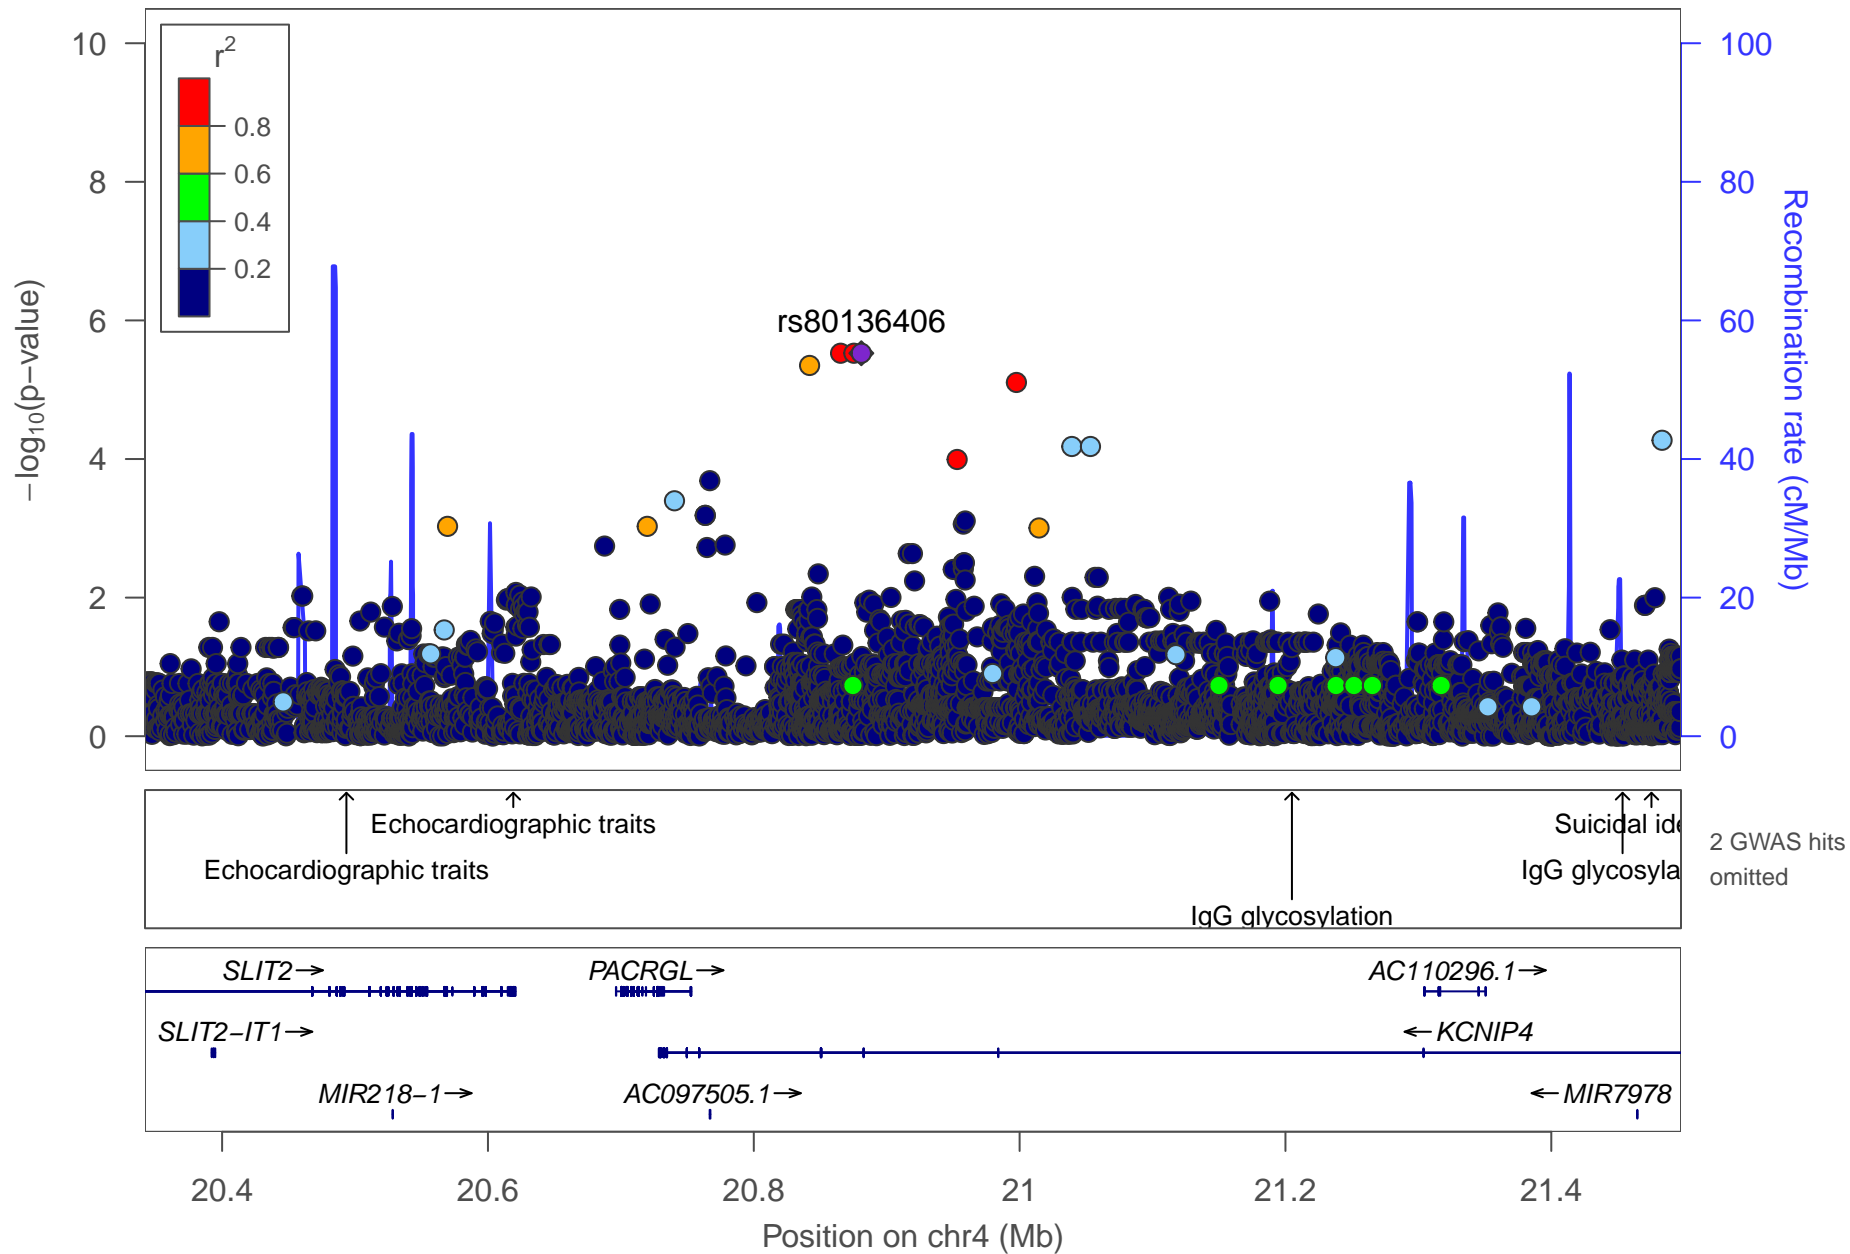

date: Thu Oct 20 22:13:34 2022

build: hg38

display range: chr4:20341970–21497591 [20341970–21497591]

hilite range: 0 – 0 [ 0 – 0 ]

reference SNP: chr4:20880902

number of SNPs plotted: 4407

min P-value: 2.98E–6 [chr4:20865311]

max P-value: 10E–1 [chr4:21449638]

omitted GWAS Hits: NA, NA

## GWAS Catalog SNPs in Region

| <b>chr</b> | <b>pos (Mb)</b> | <b>trait</b>                                                       | <b>snp</b>  |
|------------|-----------------|--------------------------------------------------------------------|-------------|
| 4          | 20.49351        | Echocardiographic traits                                           | rs666088    |
| 4          | 20.61906        | Echocardiographic traits                                           | rs1379659   |
| 4          | 21.20487        | IgG glycosylation                                                  | rs1023721   |
| 4          | 21.29181        | Parkinson disease and lewy body pathology                          | rs141863958 |
| 4          | 21.39199        | Cough in response to angiotensin–converting enzyme inhibitor drugs | rs1495509   |
| 4          | 21.45363        | IgG glycosylation                                                  | rs11942476  |
| 4          | 21.47537        | Suicidal ideation                                                  | rs358592    |



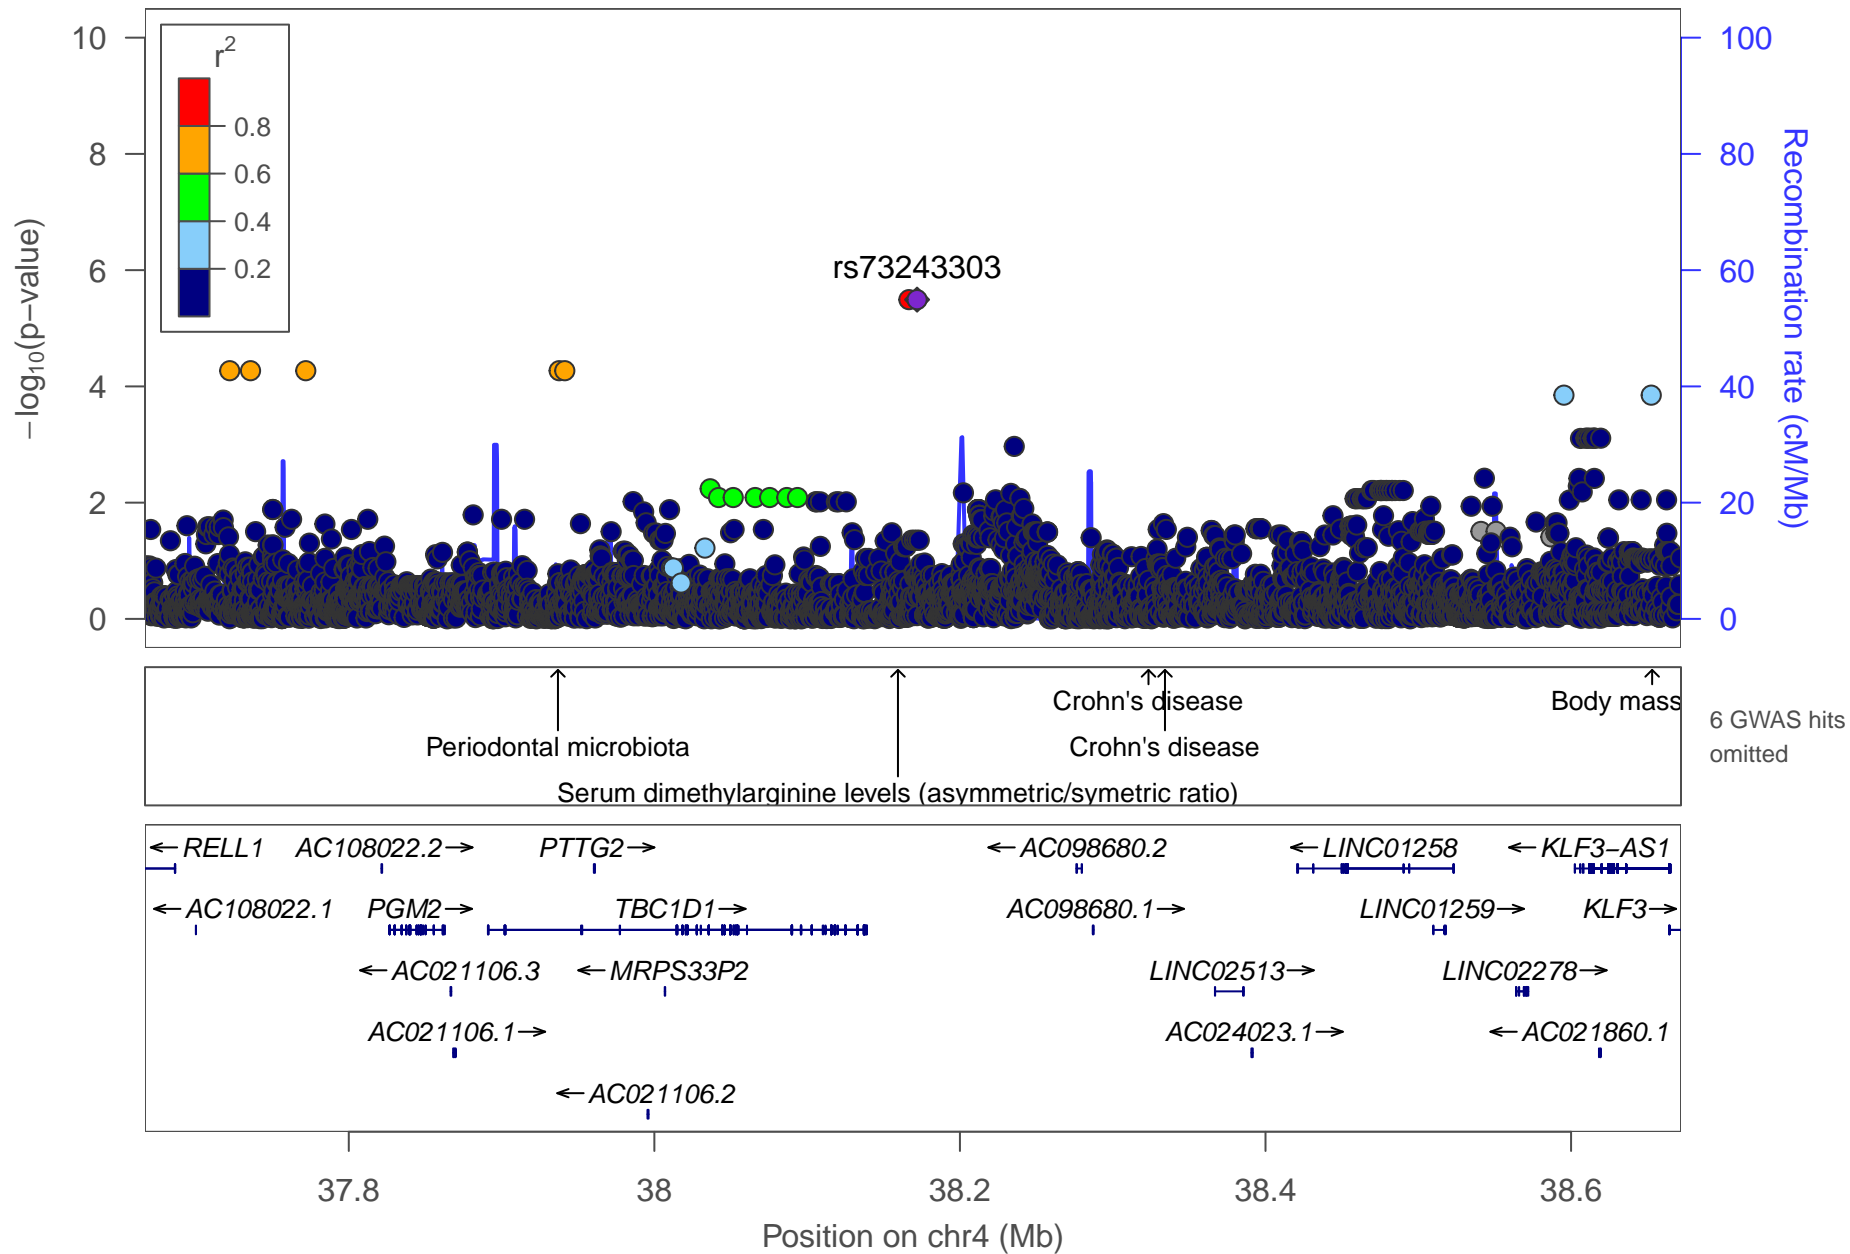

date: Thu Oct 20 22:13:35 2022

build: hg38

display range: chr4:37666618–38671945 [37666618–38671945]

hilite range: 0 – 0 [ 0 – 0 ]

reference SNP: chr4:38171945

number of SNPs plotted: 4373

min P-value: 3.21E–6 [chr4:38166618]

max P-value: 9.98E–1 [chr4:37864389]

omitted GWAS Hits: chr4:38.65306–Body mass index, NA

omitted GWAS Hits: NA, NA

## GWAS Catalog SNPs in Region

| <b>chr</b> | <b>pos (Mb)</b> | <b>trait</b>                                               | <b>snp</b>  |
|------------|-----------------|------------------------------------------------------------|-------------|
| 4          | 37.73637        | Staphylococcus aureus nasal carriage (intermittent)        | rs16993852  |
| 4          | 37.93690        | Periodontal microbiota                                     | rs10010758  |
| 4          | 38.01141        | Verbal declarative memory                                  | rs13132184  |
| 4          | 38.15944        | Serum dimethylarginine levels (asymmetric/symmetric ratio) | rs115426111 |
| 4          | 38.15944        | Symmetrical dimethylarginine levels                        | rs115426111 |
| 4          | 38.32341        | Crohn's disease                                            | rs6856616   |
| 4          | 38.32341        | Inflammatory bowel disease                                 | rs6856616   |
| 4          | 38.33420        | Crohn's disease                                            | rs1487630   |
| 4          | 38.46385        | Obesity-related traits                                     | rs4615179   |
| 4          | 38.50312        | Post bronchodilator FEV1/FVC ratio in COPD                 | rs142846286 |
| 4          | 38.65306        | Body mass index                                            | rs4833079   |

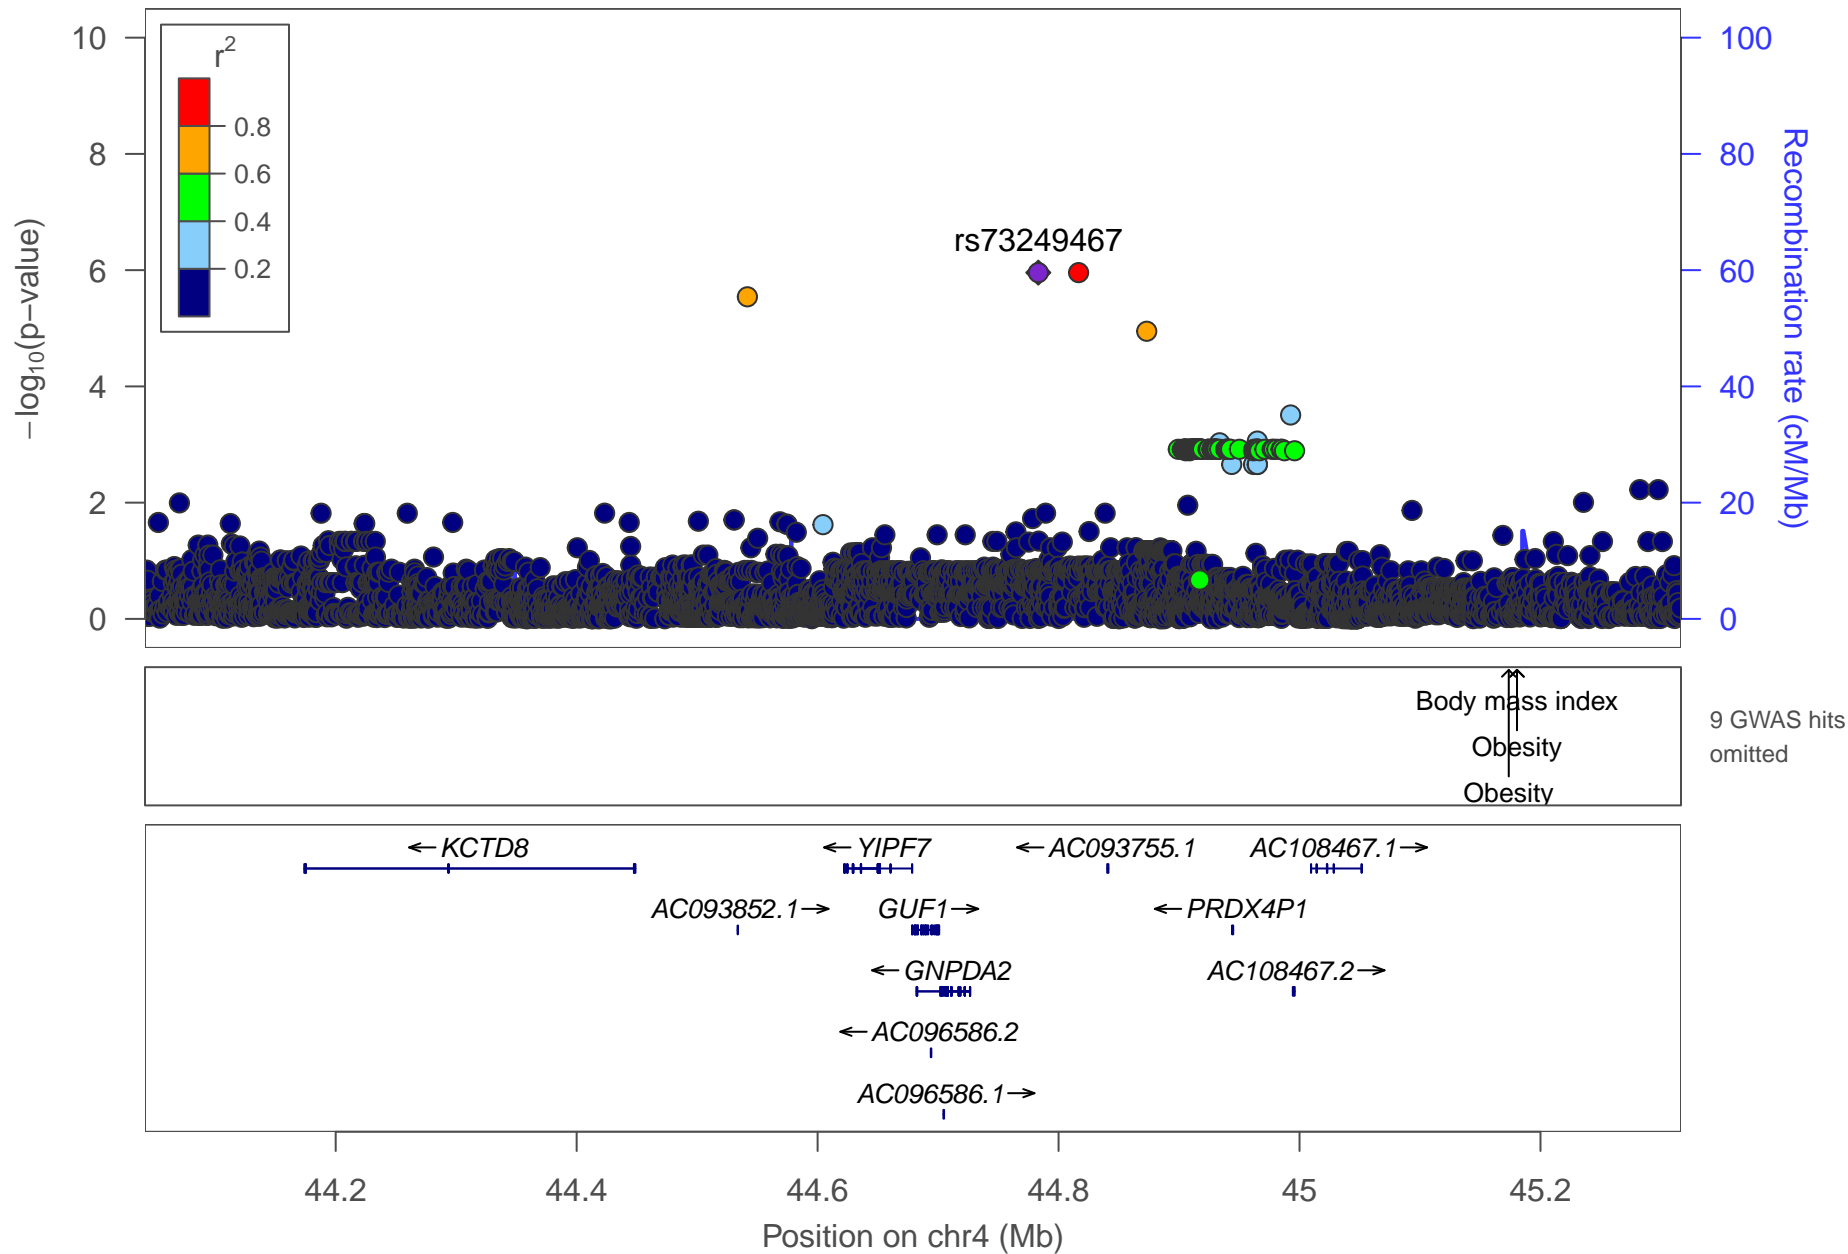

date: Thu Oct 20 22:13:36 2022

build: hg38

display range: chr4:44041725–45316634 [44041725–45316634]

hilite range: 0 – 0 [ 0 – 0 ]

reference SNP: chr4:44783196

number of SNPs plotted: 4920

min P-value: 1.1E-6 [chr4:44783196]

max P-value: 10E-1 [chr4:44931134]

omitted GWAS Hits: NA, NA

omitted GWAS Hits: NA, NA

omitted GWAS Hits: NA, NA

## GWAS Catalog SNPs in Region

| <b>chr</b> | <b>pos (Mb)</b> | <b>trait</b>              | <b>snp</b> |
|------------|-----------------|---------------------------|------------|
| 4          | 44.21015        | Response to amphetamines  | rs17641529 |
| 4          | 44.58047        | Body mass index           | rs10938353 |
| 4          | 45.07699        | Systolic blood pressure   | rs996004   |
| 4          | 45.17367        | Obesity                   | rs13130484 |
| 4          | 45.17367        | Body mass index           | rs13130484 |
| 4          | 45.17367        | Childhood body mass index | rs13130484 |
| 4          | 45.17379        | Body mass index           | rs16858082 |
| 4          | 45.18051        | Body mass index           | rs10938397 |
| 4          | 45.18051        | Obesity                   | rs10938397 |
| 4          | 45.18051        | Menarche (age at onset)   | rs10938397 |
| 4          | 45.18051        | Childhood body mass index | rs10938397 |
| 4          | 45.18243        | Body mass index           | rs348495   |

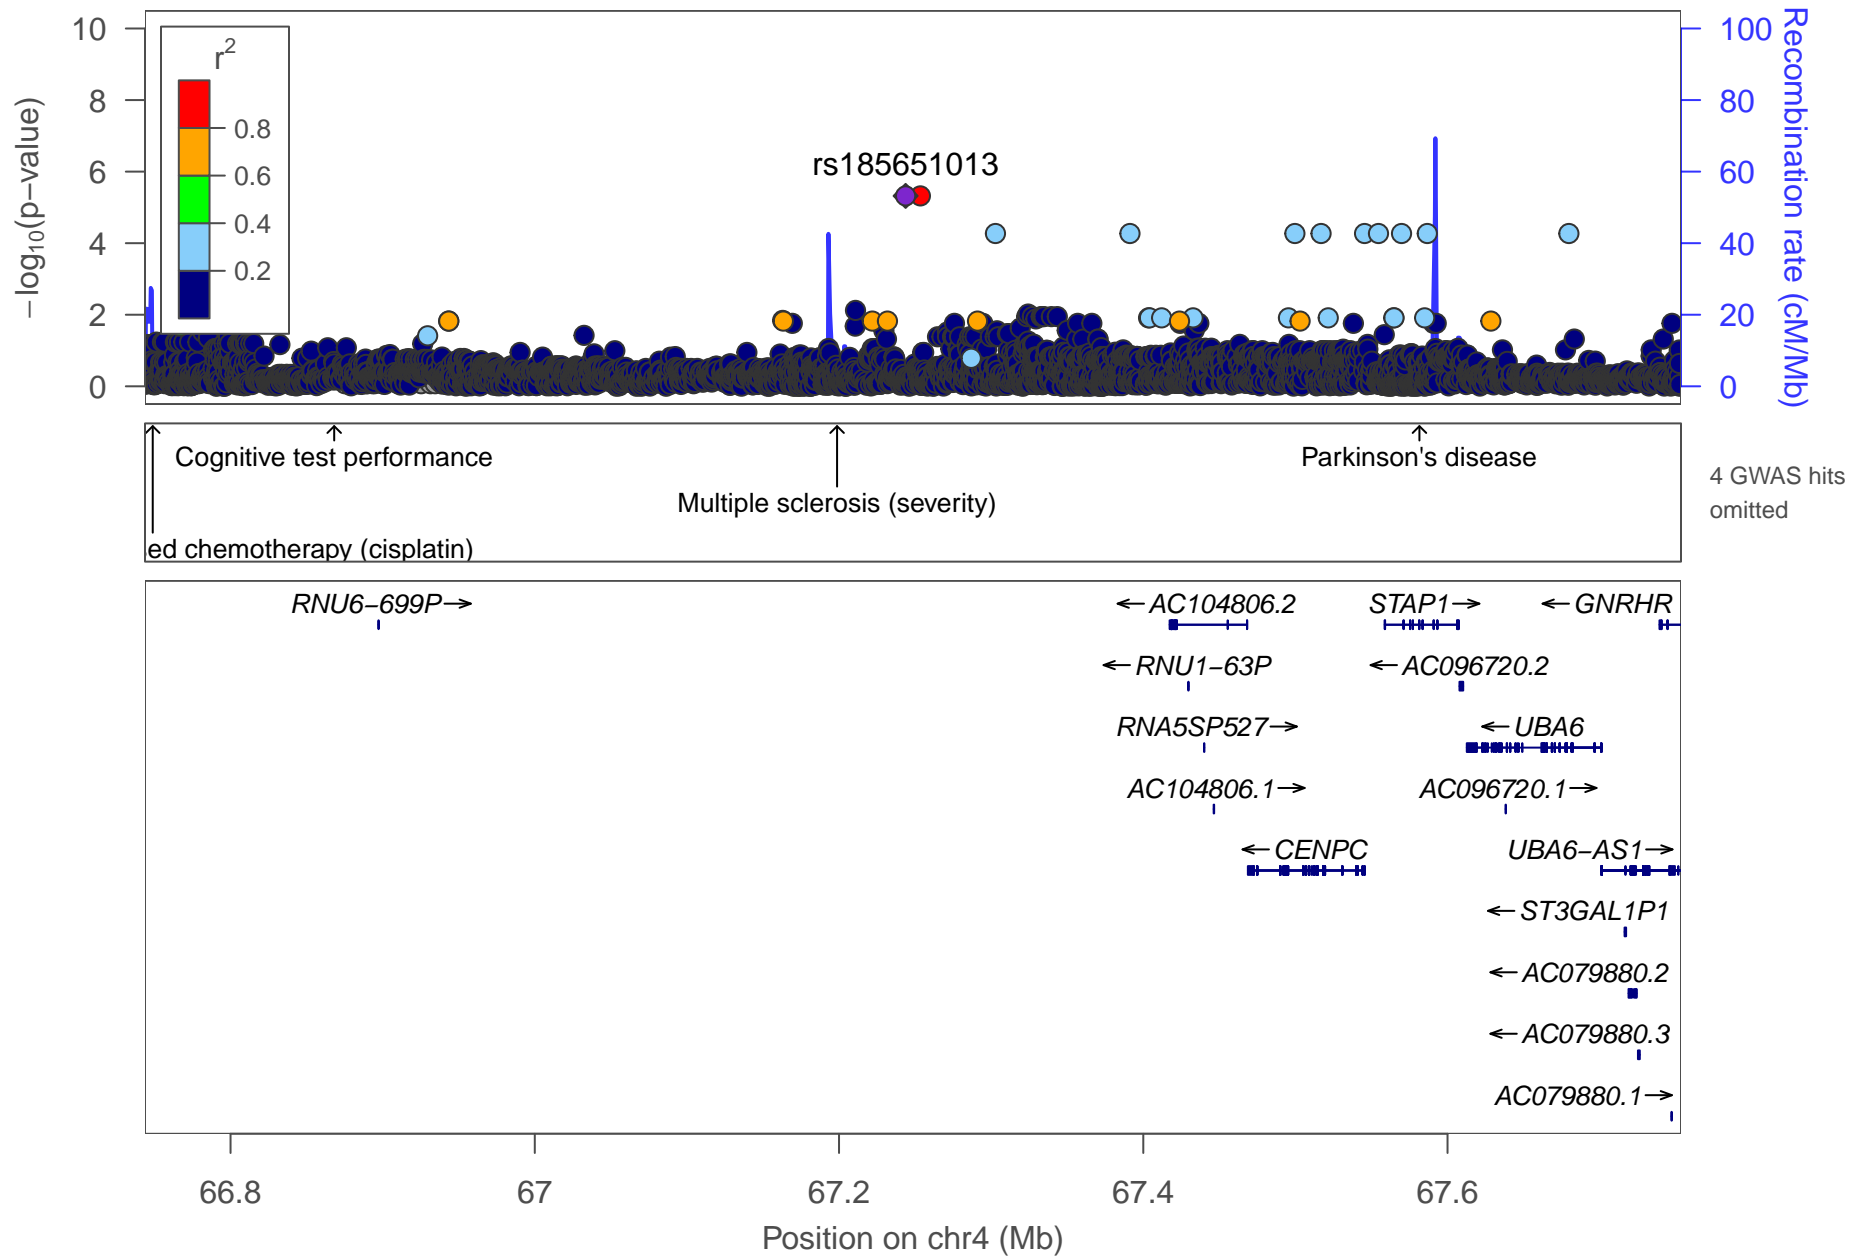

date: Thu Oct 20 22:13:32 2022

build: hg38

display range: chr4:66743770–67753470 [66743770–67753470]

hilite range: 0 – 0 [ 0 – 0 ]

reference SNP: chr4:67243770

number of SNPs plotted: 3487

min P-value: 4.77E–6 [chr4:67243770]

max P-value: 9.99E–1 [chr4:67170358]

omitted GWAS Hits: NA, NA

omitted GWAS Hits: NA



## GWAS Catalog SNPs in Region

| <b>chr</b> | <b>pos (Mb)</b> | <b>trait</b>                                        | <b>snp</b> |
|------------|-----------------|-----------------------------------------------------|------------|
| 4          | 66.74885        | Response to platinum–based chemotherapy (cisplatin) | rs4860223  |
| 4          | 66.86814        | Cognitive test performance                          | rs1155865  |
| 4          | 66.86818        | Urate levels (BMI interaction)                      | rs1155866  |
| 4          | 66.95616        | Educational attainment (years of education)         | rs4308415  |
| 4          | 67.19089        | Glucose homeostasis traits                          | rs7690543  |
| 4          | 67.19863        | Positive affect                                     | rs17766081 |
| 4          | 67.19872        | Multiple sclerosis (severity)                       | rs10518025 |
| 4          | 67.58153        | Parkinson's disease                                 | rs2242330  |

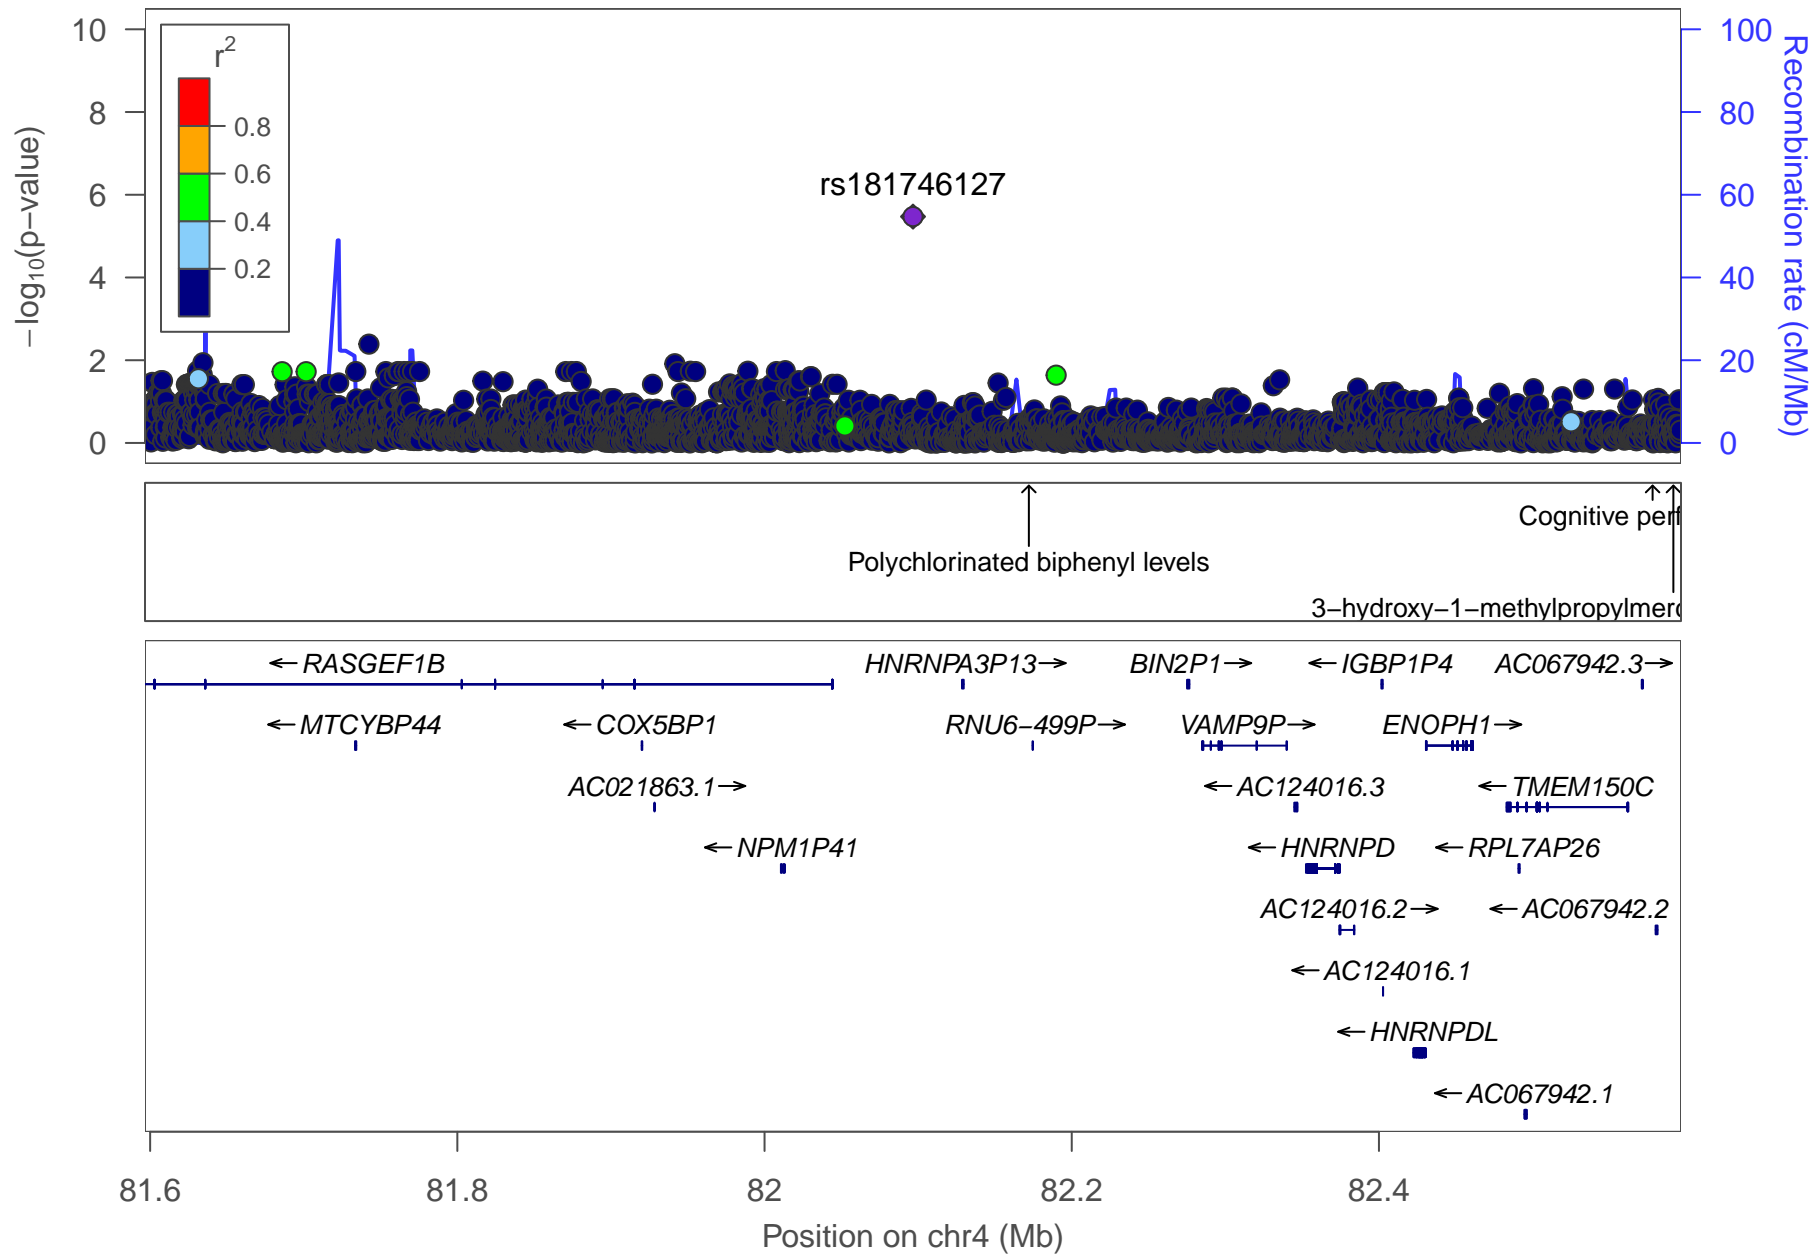

date: Thu Oct 20 22:13:31 2022

build: hg38

display range: chr4:81596651–82596651 [81596651–82596651]

hilite range: 0 – 0 [ 0 – 0 ]

reference SNP: chr4:82096651

number of SNPs plotted: 3440

min P-value: 3.38E–6 [chr4:82096651]

max P-value: 10E–1 [chr4:82107786]

## GWAS Catalog SNPs in Region

| <b>chr</b> | <b>pos (Mb)</b> | <b>trait</b>                                               | <b>snp</b>  |
|------------|-----------------|------------------------------------------------------------|-------------|
| 4          | 82.17208        | Polychlorinated biphenyl levels                            | rs182442984 |
| 4          | 82.57816        | Cognitive performance                                      | rs7658637   |
| 4          | 82.59169        | 3-hydroxy-1-methylpropylmercapturic acid levels in smokers | rs72909131  |

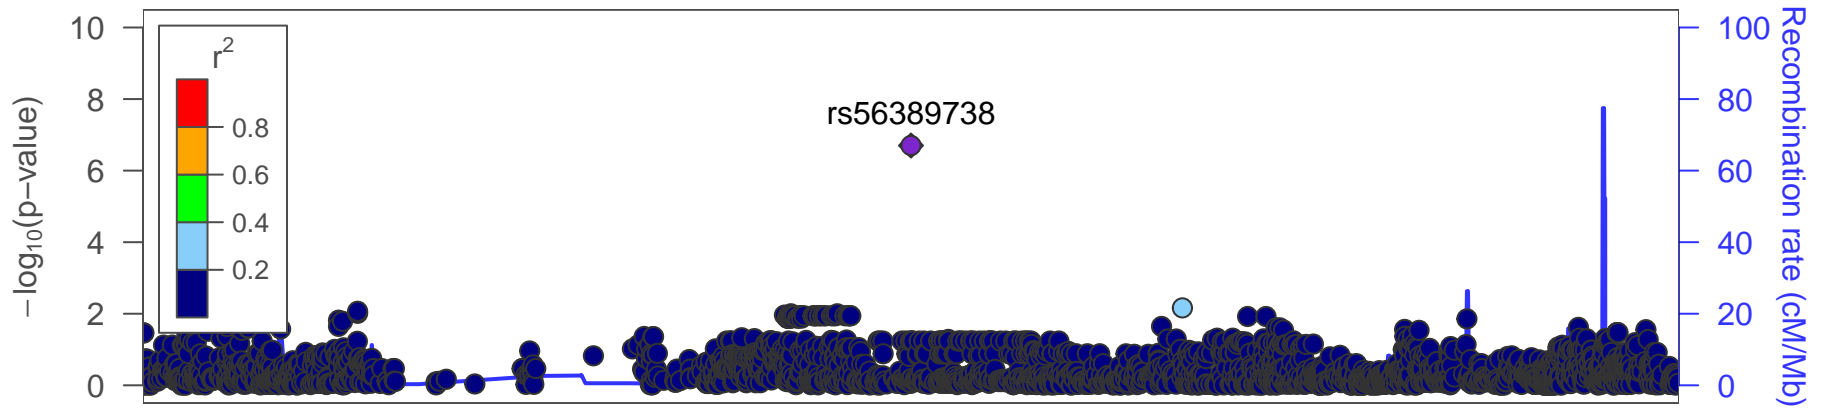

↑ related nuclear cataracts  
 ↑ activity disorder (inattention symptoms)

↑ Obesity-related traits  
 ↑ Menopause (age at onset)

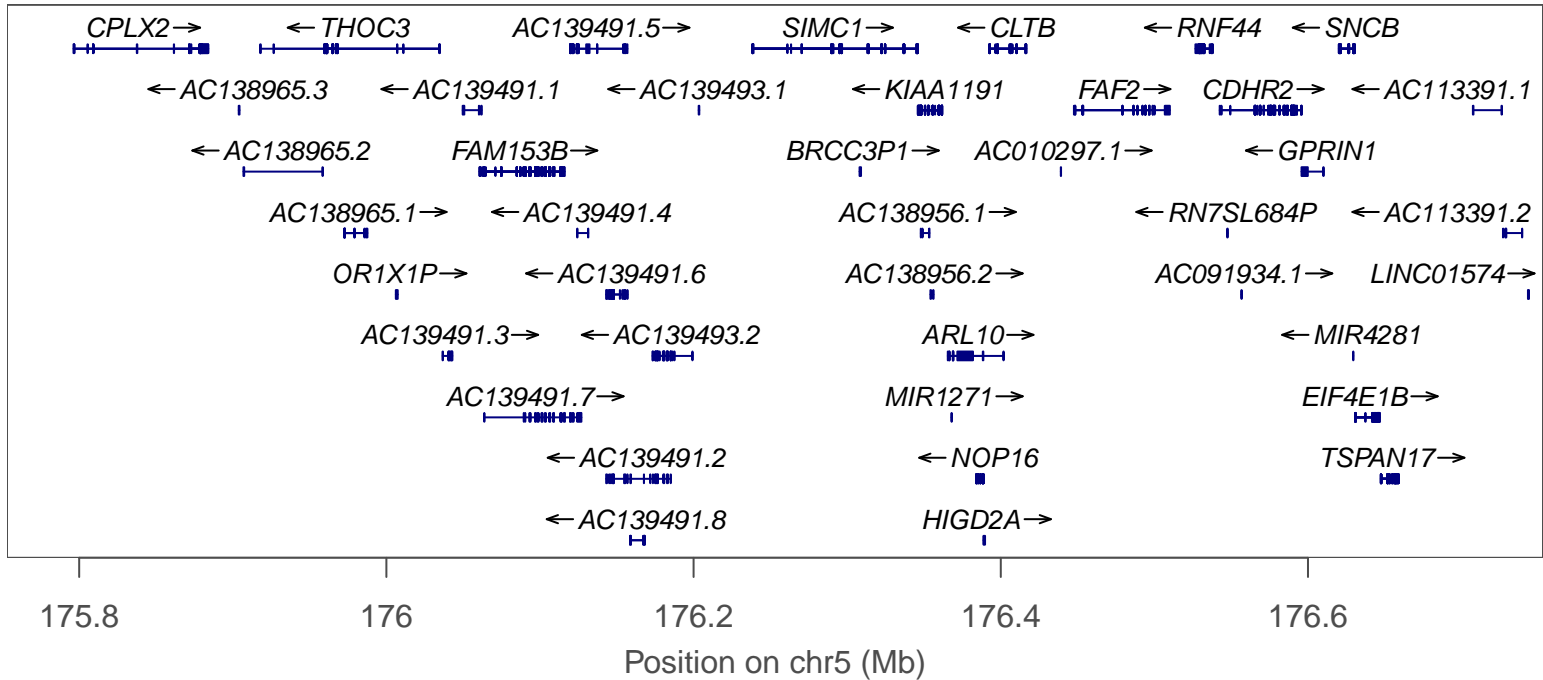

date: Thu Oct 20 22:13:33 2022

build: hg38

display range: chr5:175753006–176753006 [175753006–176753006]

hilite range: 0 – 0 [ 0 – 0 ]

reference SNP: chr5:176253006

number of SNPs plotted: 2346

min P-value: 1.99E-7 [chr5:176253006]

max P-value: 9.99E-1 [chr5:176519943]

## GWAS Catalog SNPs in Region

| <b>chr</b> | <b>pos (Mb)</b> | <b>trait</b>                                                    | <b>snp</b> |
|------------|-----------------|-----------------------------------------------------------------|------------|
| 5          | 175.8170        | Attention deficit hyperactivity disorder (inattention symptoms) | rs7448069  |
| 5          | 175.8174        | Age-related nuclear cataracts                                   | rs55914911 |
| 5          | 176.4230        | Obesity-related traits                                          | rs2913737  |
| 5          | 176.5293        | Menopause (age at onset)                                        | rs890835   |





date: Thu Oct 20 22:13:31 2022

build: hg38

display range: chr6:112863777–113865898 [112863777–113865898]

hilite range: 0 – 0 [ 0 – 0 ]

reference SNP: chr6:113363777

number of SNPs plotted: 3079

min P-value: 8.06E–6 [chr6:113363777]

max P-value: 10E–1 [chr6:113388411]

omitted GWAS Hits: chr6:113.586847–Type 2 diabetes, NA

omitted GWAS Hits: NA

GWAS Catalog SNPs in Region

| chr | pos (Mb) | trait                                                                                | snp         |
|-----|----------|--------------------------------------------------------------------------------------|-------------|
| 6   | 113.1382 | Plasma clusterin levels                                                              | rs2502399   |
| 6   | 113.1581 | Asthma (childhood onset)                                                             | rs2473967   |
| 6   | 113.3200 | Plasma omega-6 polyunsaturated fatty acid levels (arachidonic acid)                  | rs9942436   |
| 6   | 113.3247 | Plasma omega-6 polyunsaturated fatty acid levels (arachidonic acid)                  | rs2637523   |
| 6   | 113.3441 | Coronary artery calcification                                                        | rs7765175   |
| 6   | 113.3990 | Alzheimer disease and age of onset                                                   | rs11961710  |
| 6   | 113.5868 | Type 2 diabetes                                                                      | rs149358103 |
| 6   | 113.6959 | Disc degeneration (lumbar)                                                           | rs9488238   |
| 6   | 113.7505 | Event free survival in diffuse large B-cell lymphoma treated with immunochemotherapy | rs7765004   |

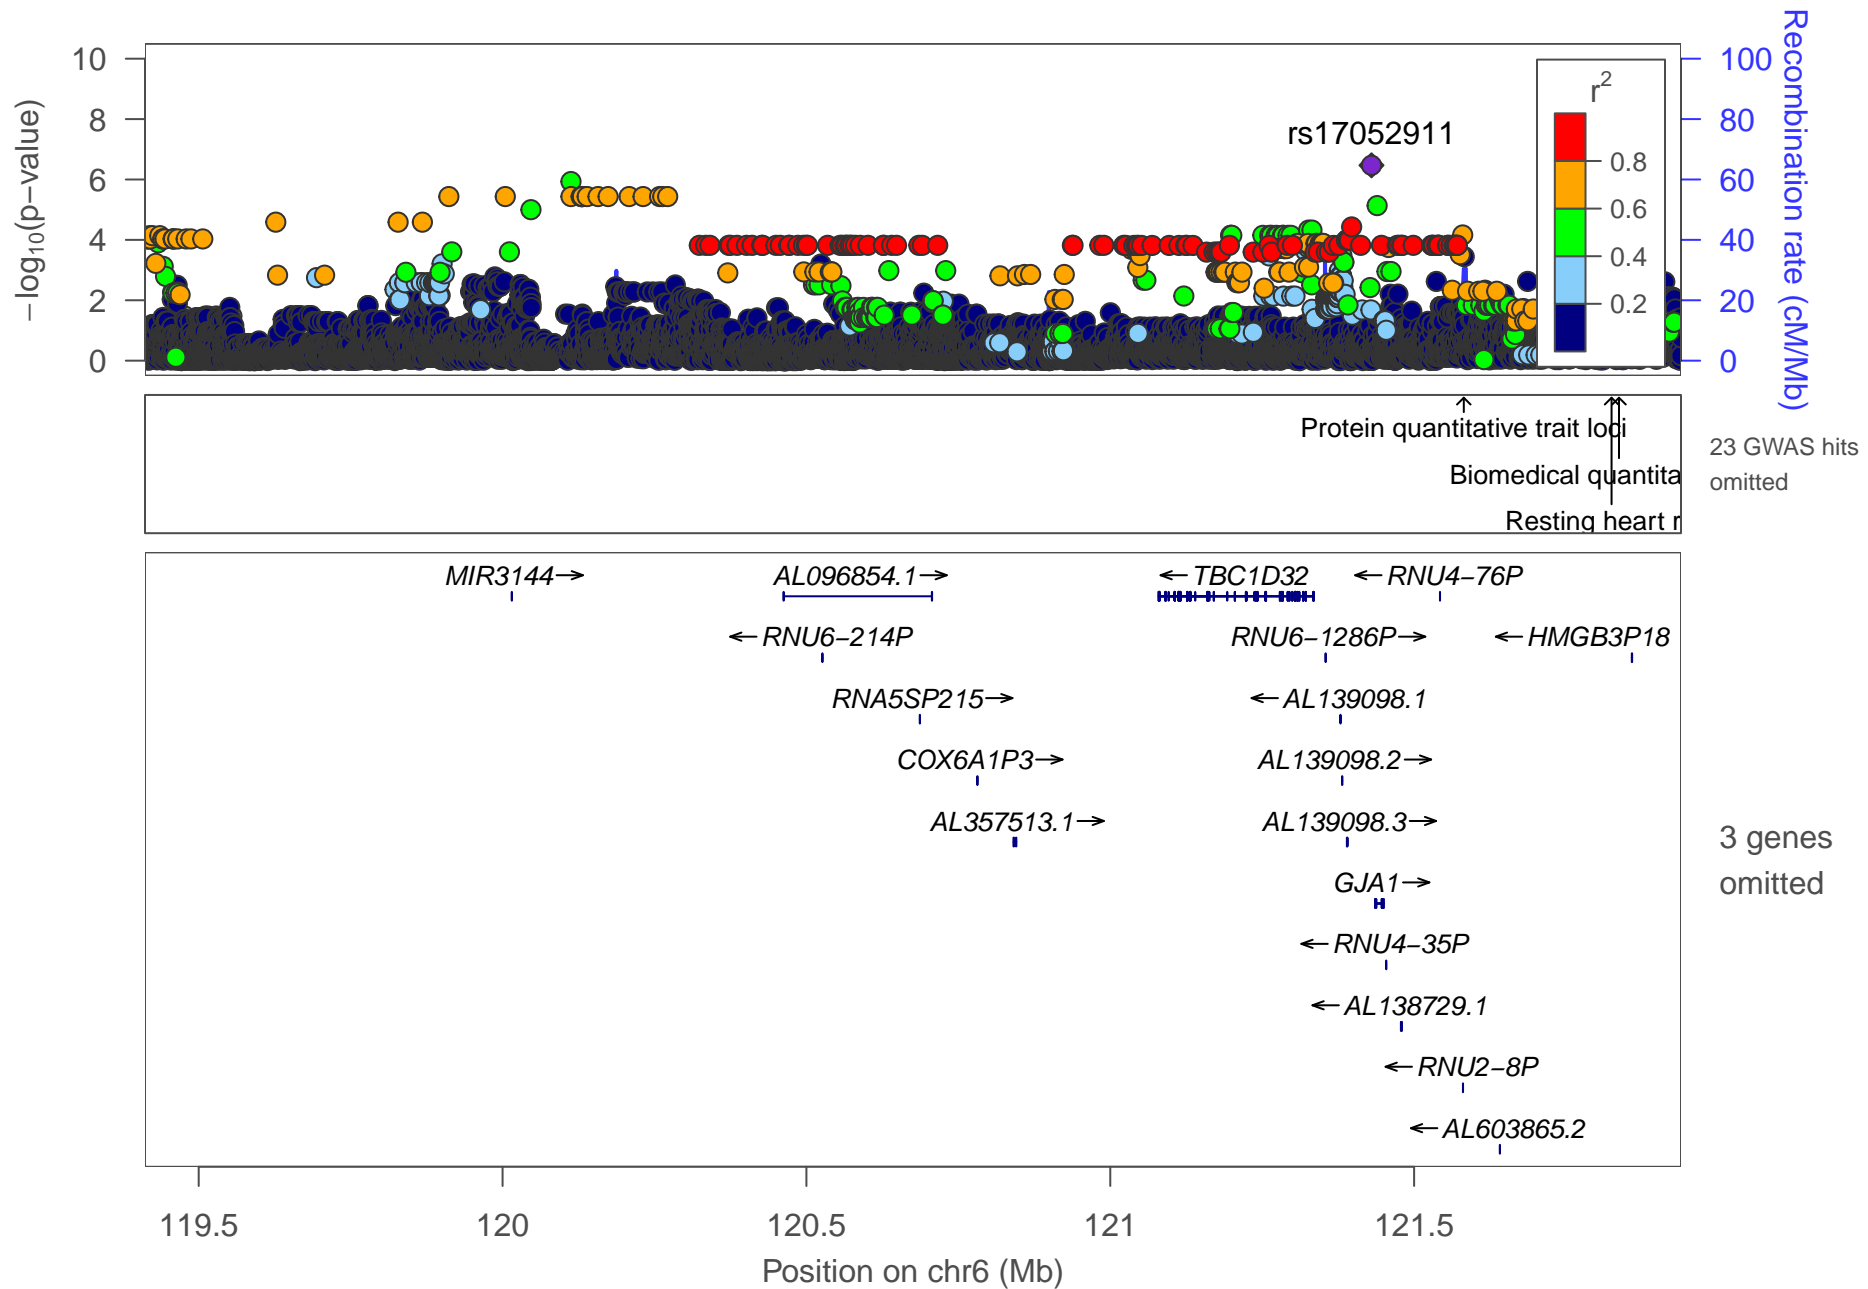

date: Thu Oct 20 22:13:36 2022

build: hg38

display range: chr6:119411624–121939143 [119411624–121939143]

hilite range: 0 – 0 [ 0 – 0 ]

reference SNP: chr6:121429849

number of SNPs plotted: 9023

min P-value: 3.39E-7 [chr6:121429849]

max P-value: 10E-1 [chr6:121311588]

omitted Genes: SLC25A5P7, RPL23AP48, AL603865.1

omitted GWAS Hits: NA, NA

GWAS Catalog SNPs in Region

| chr | pos (Mb) | trait                                                                   | snp        |
|-----|----------|-------------------------------------------------------------------------|------------|
| 6   | 119.5450 | Immune reponse to smallpox (secreted IL-2)                              | rs1392089  |
| 6   | 119.6222 | Spontaneous preterm birth (preterm birth)                               | rs2794256  |
| 6   | 119.8645 | Body mass index                                                         | rs9374842  |
| 6   | 119.9464 | Neuroticism                                                             | rs6569095  |
| 6   | 119.9536 | Systemic lupus erythematosus                                            | rs4574684  |
| 6   | 120.1544 | Post bronchodilator FEV1/FVC ratio                                      | rs56804048 |
| 6   | 120.1760 | Post bronchodilator FEV1/FVC ratio                                      | rs56392554 |
| 6   | 120.4428 | Post bronchodilator FEV1 in COPD                                        | rs73527062 |
| 6   | 120.7773 | Primary tooth development (number of teeth)                             | rs2817937  |
| 6   | 120.7790 | HIV-1 viral setpoint                                                    | rs2789066  |
| 6   | 120.8687 | Peak creatinine levels in vancomycin therapy                            | rs2789047  |
| 6   | 121.0180 | Cognitive performance                                                   | rs1343075  |
| 6   | 121.4096 | Heart rate                                                              | rs17083533 |
| 6   | 121.4274 | Resting heart rate                                                      | rs11154022 |
| 6   | 121.4374 | Resting heart rate                                                      | rs3792943  |
| 6   | 121.4602 | Heart rate                                                              | rs11154027 |
| 6   | 121.4957 | Migraine                                                                | rs9490306  |
| 6   | 121.4957 | Migraine without aura                                                   | rs9490306  |
| 6   | 121.5249 | Migraine                                                                | rs28455731 |
| 6   | 121.5817 | Protein quantitative trait loci                                         | rs4541776  |
| 6   | 121.6145 | Systolic blood pressure response to hydrochlorothiazide in hypertension | rs11750990 |

## GWAS Catalog SNPs in Region

| <b>chr</b> | <b>pos (Mb)</b> | <b>trait</b>                   | <b>snp</b> |
|------------|-----------------|--------------------------------|------------|
| 6          | 121.7933        | Resting heart rate             | rs9320841  |
| 6          | 121.8103        | Heart rate                     | rs1015451  |
| 6          | 121.8249        | Resting heart rate             | rs9398652  |
| 6          | 121.8371        | Biomedical quantitative traits | rs12110693 |
| 6          | 121.8470        | Resting heart rate             | rs1320761  |

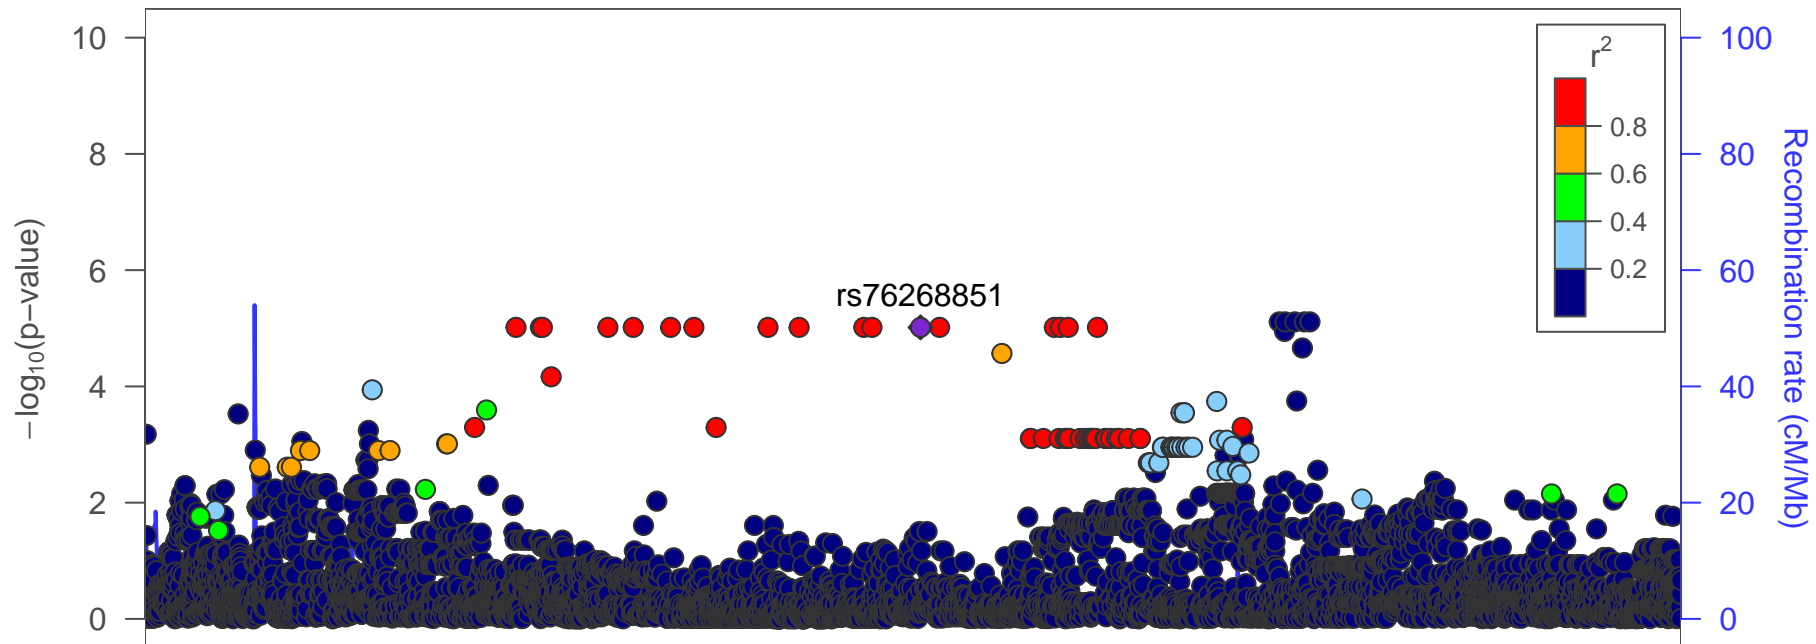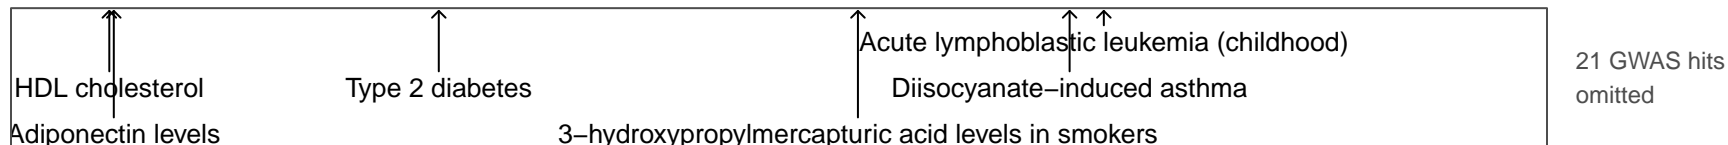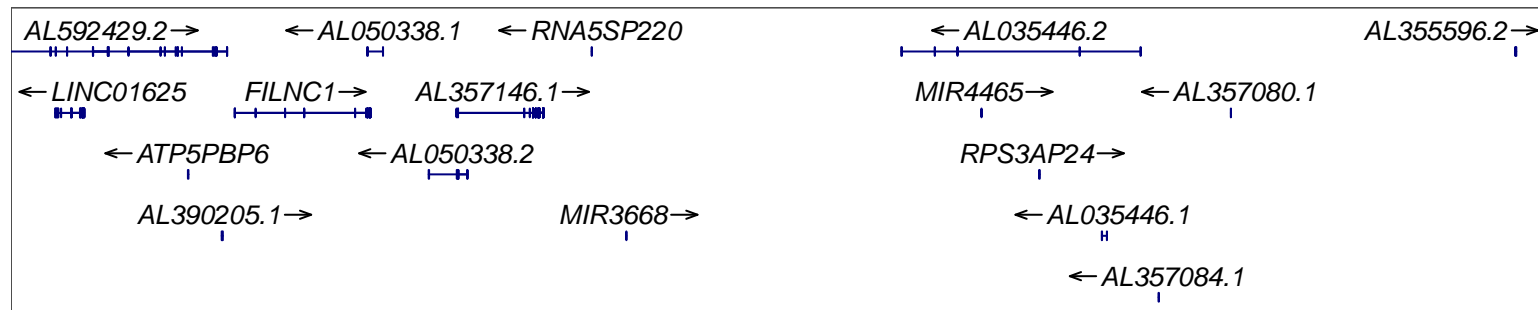

139.5

140

140.5

141

Position on chr6 (Mb)

date: Thu Oct 20 22:13:35 2022

build: hg38

display range: chr6:139376036–141445884 [139376036–141445884]

hilite range: 0 – 0 [ 0 – 0 ]

reference SNP: chr6:140421061

number of SNPs plotted: 5695

min P-value: 7.76E–6 [chr6:140904514]

max P-value: 10E–1 [chr6:140223977]

omitted GWAS Hits: chr6:140.802574–Diisocyanate–induced asthma, chr6:140.517337–3–hydroxypropylmercaptur

omitted GWAS Hits: NA, NA



GWAS Catalog SNPs in Region

| chr | pos (Mb) | trait                                                          | snp         |
|-----|----------|----------------------------------------------------------------|-------------|
| 6   | 139.4567 | Post bronchodilator FEV1/FVC ratio                             | rs184091137 |
| 6   | 139.5085 | HDL cholesterol                                                | rs605066    |
| 6   | 139.5100 | Blood trace element (Se levels)                                | rs679582    |
| 6   | 139.5129 | Mean corpuscular hemoglobin                                    | rs632057    |
| 6   | 139.5129 | Mean corpuscular volume                                        | rs632057    |
| 6   | 139.5144 | Triglycerides                                                  | rs17585887  |
| 6   | 139.5146 | Adiponectin levels                                             | rs668459    |
| 6   | 139.5146 | Mean corpuscular volume                                        | rs668459    |
| 6   | 139.5146 | Mean corpuscular hemoglobin                                    | rs668459    |
| 6   | 139.5173 | Mean corpuscular hemoglobin                                    | rs628751    |
| 6   | 139.5183 | Mean corpuscular volume                                        | rs643381    |
| 6   | 139.5184 | Triglycerides                                                  | rs608736    |
| 6   | 139.5196 | Adiponectin levels                                             | rs592423    |
| 6   | 139.5233 | Red blood cell traits                                          | rs590856    |
| 6   | 139.5777 | Urate levels in lean individuals                               | rs9495528   |
| 6   | 139.8187 | IgG glycosylation                                              | rs12664111  |
| 6   | 139.8323 | Response to simvastatin treatment (PCSK9 protein level change) | rs6903961   |
| 6   | 139.8749 | Alzheimer disease and age of onset                             | rs17069431  |
| 6   | 139.9525 | Type 2 diabetes                                                | rs642858    |
| 6   | 140.1277 | 3-hydroxypropylmercapturic acid levels in smokers              | rs75402058  |
| 6   | 140.1958 | 3-hydroxypropylmercapturic acid levels in smokers              | rs76846186  |

## GWAS Catalog SNPs in Region

| <b>chr</b> | <b>pos (Mb)</b> | <b>trait</b>                                                            | <b>snp</b>  |
|------------|-----------------|-------------------------------------------------------------------------|-------------|
| 6          | 140.5173        | 3-hydroxypropylmercapturic acid levels in smokers                       | rs146383502 |
| 6          | 140.7007        | Night sleep phenotypes                                                  | rs6900992   |
| 6          | 140.7014        | Night sleep phenotypes                                                  | rs7740706   |
| 6          | 140.7368        | Systolic blood pressure response to hydrochlorothiazide in hypertension | rs2876449   |
| 6          | 140.8026        | Diisocyanate-induced asthma                                             | rs61613191  |
| 6          | 140.8487        | Acute lymphoblastic leukemia (childhood)                                | rs11155133  |

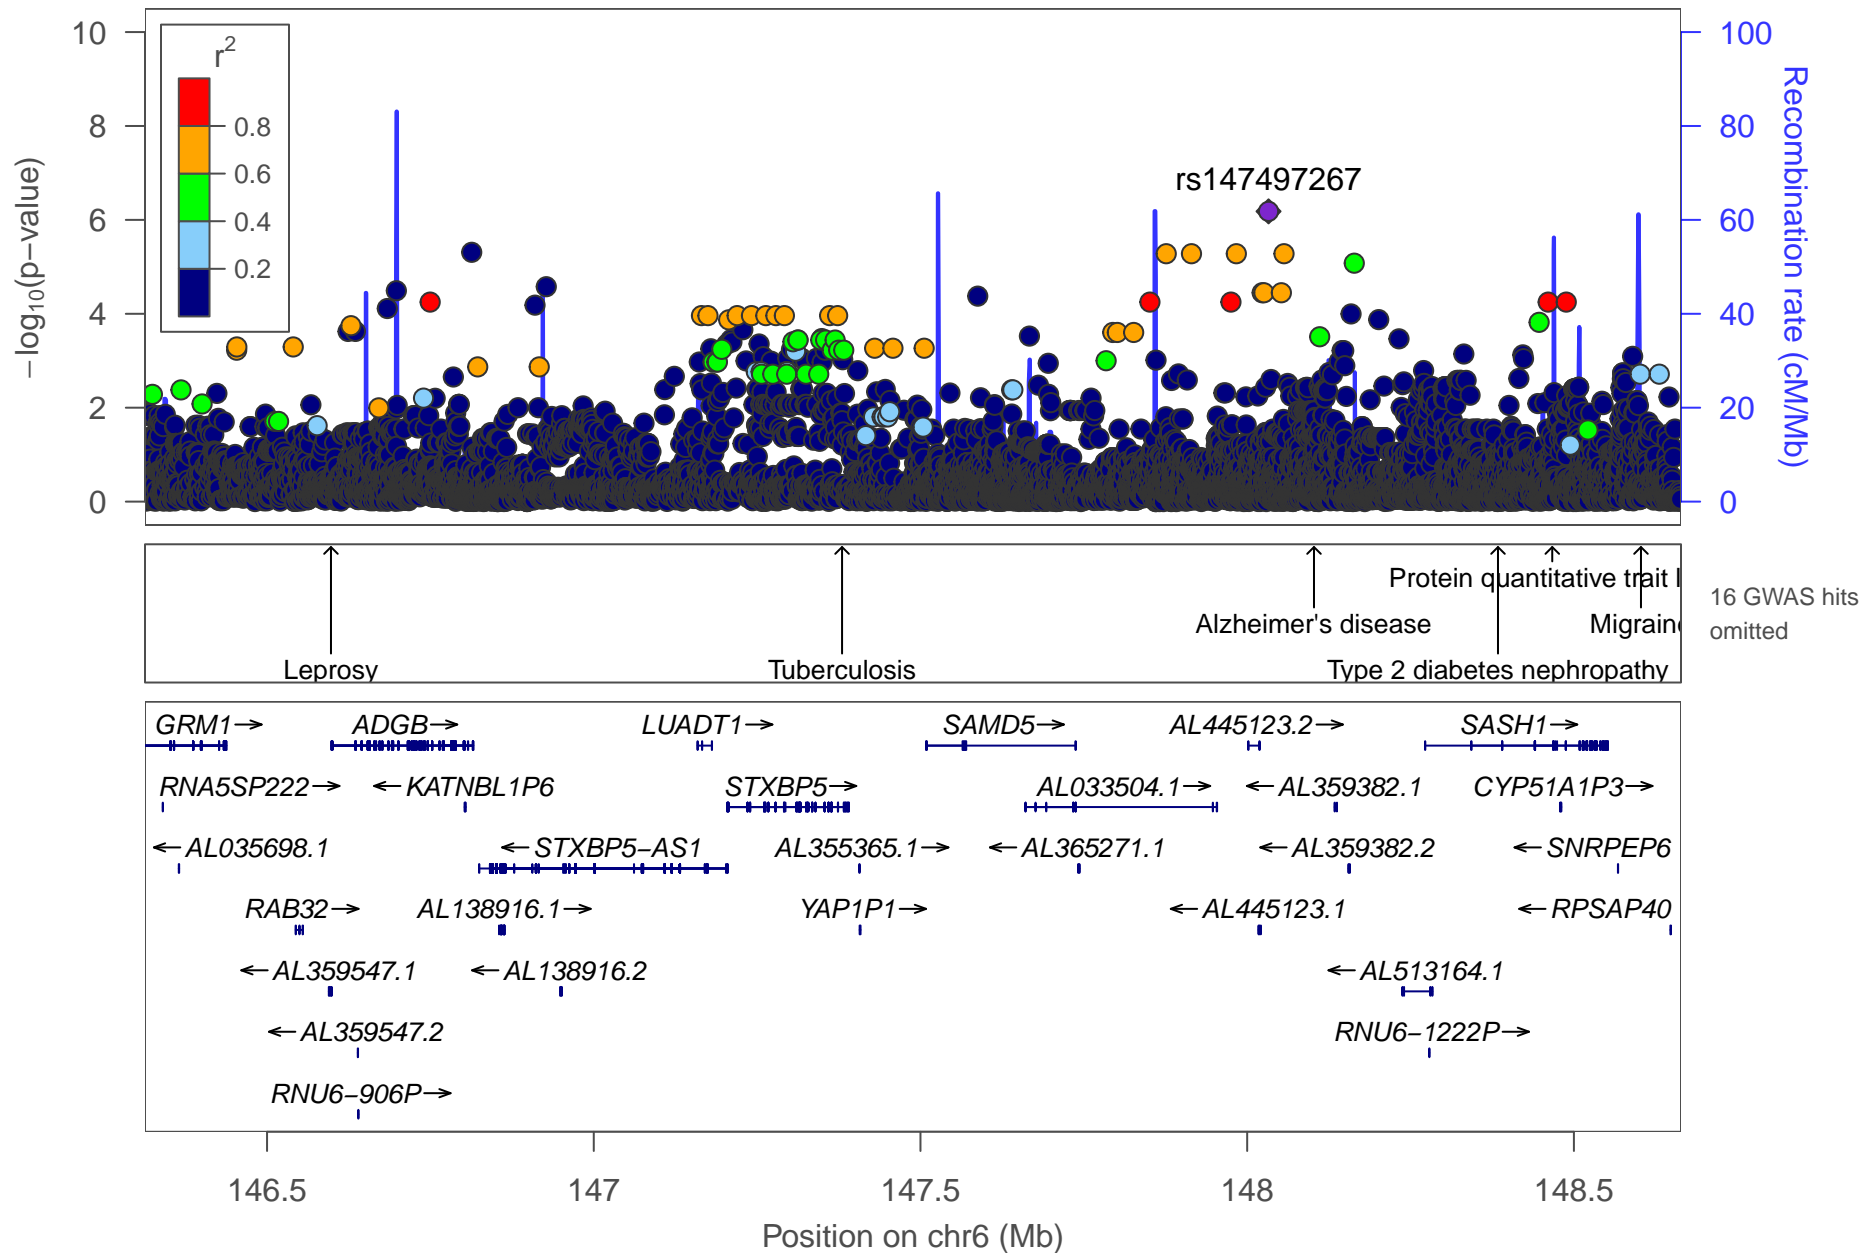

date: Thu Oct 20 22:13:36 2022

build: hg38

display range: chr6:146313216–148663893 [146313216–148663893]

hilite range: 0 – 0 [ 0 – 0 ]

reference SNP: chr6:148032677

number of SNPs plotted: 8154

min P-value: 6.58E-7 [chr6:148032677]

max P-value: 9.99E-1 [chr6:147745470]

omitted GWAS Hits: chr6:148.602653–Migraine, NA

omitted GWAS Hits: NA, NA

omitted GWAS Hits: NA

GWAS Catalog SNPs in Region

| chr | pos (Mb) | trait                                     | snp         |
|-----|----------|-------------------------------------------|-------------|
| 6   | 146.3600 | Cerebral amyloid deposition (PET imaging) | rs362902    |
| 6   | 146.5765 | Leprosy                                   | rs13220141  |
| 6   | 146.5978 | Leprosy                                   | rs2275606   |
| 6   | 147.2099 | Bronchopulmonary dysplasia                | rs2786189   |
| 6   | 147.2142 | Low vWF levels                            | rs1221638   |
| 6   | 147.2282 | Bronchopulmonary dysplasia                | rs556493    |
| 6   | 147.3592 | vWF levels                                | rs9390459   |
| 6   | 147.3800 | Tuberculosis                              | rs9373523   |
| 6   | 147.3822 | Plasma plasminogen activator levels       | rs9399599   |
| 6   | 147.4384 | IgG glycosylation                         | rs9403856   |
| 6   | 147.6138 | Obesity-related traits                    | rs9377063   |
| 6   | 147.6504 | Myopia (pathological)                     | rs1302019   |
| 6   | 147.6719 | Asthma                                    | rs9390491   |
| 6   | 148.0693 | Night sleep phenotypes                    | rs112390069 |
| 6   | 148.1022 | Alzheimer's disease                       | rs9390537   |
| 6   | 148.2002 | Thyroid hormone levels                    | rs9497965   |
| 6   | 148.2267 | HIV-1 control                             | rs9497975   |
| 6   | 148.3838 | Type 2 diabetes nephropathy               | rs6930576   |
| 6   | 148.4660 | Rotator cuff tears                        | rs12527089  |
| 6   | 148.4669 | Protein quantitative trait loci           | rs6930337   |
| 6   | 148.5206 | Smoking quantity                          | rs1147857   |

## GWAS Catalog SNPs in Region

| chr | pos (Mb) | trait    | snp        |
|-----|----------|----------|------------|
| 6   | 148.6027 | Migraine | rs13196614 |



date: Thu Oct 20 22:13:34 2022

build: hg38

display range: chr6:17003320–18026280 [17003320–18026280]

hilite range: 0 – 0 [ 0 – 0 ]

reference SNP: chr6:17503320

number of SNPs plotted: 3761

min P-value: 2.16E–6 [chr6:17503320]

max P-value: 9.99E–1 [chr6:17657409]

omitted GWAS Hits: chr6:17.63283–Obesity–related traits, NA



## GWAS Catalog SNPs in Region

| <b>chr</b> | <b>pos (Mb)</b> | <b>trait</b>                                                           | <b>snp</b>  |
|------------|-----------------|------------------------------------------------------------------------|-------------|
| 6          | 17.16089        | Response to lithium treatment in bipolar disorder                      | rs9396756   |
| 6          | 17.24092        | Immune response to smallpox vaccine (IL-6)                             | rs1322846   |
| 6          | 17.28309        | Glucose homeostasis traits                                             | rs3749855   |
| 6          | 17.42231        | Mitochondrial DNA levels                                               | rs10485376  |
| 6          | 17.50571        | Response to serotonin reuptake inhibitors in major depressive disorder | rs910039    |
| 6          | 17.63283        | Obesity-related traits                                                 | rs2274136   |
| 6          | 17.69909        | Height                                                                 | rs12199222  |
| 6          | 17.74578        | Thiopurine S-methyltransferase activity                                | rs187976596 |

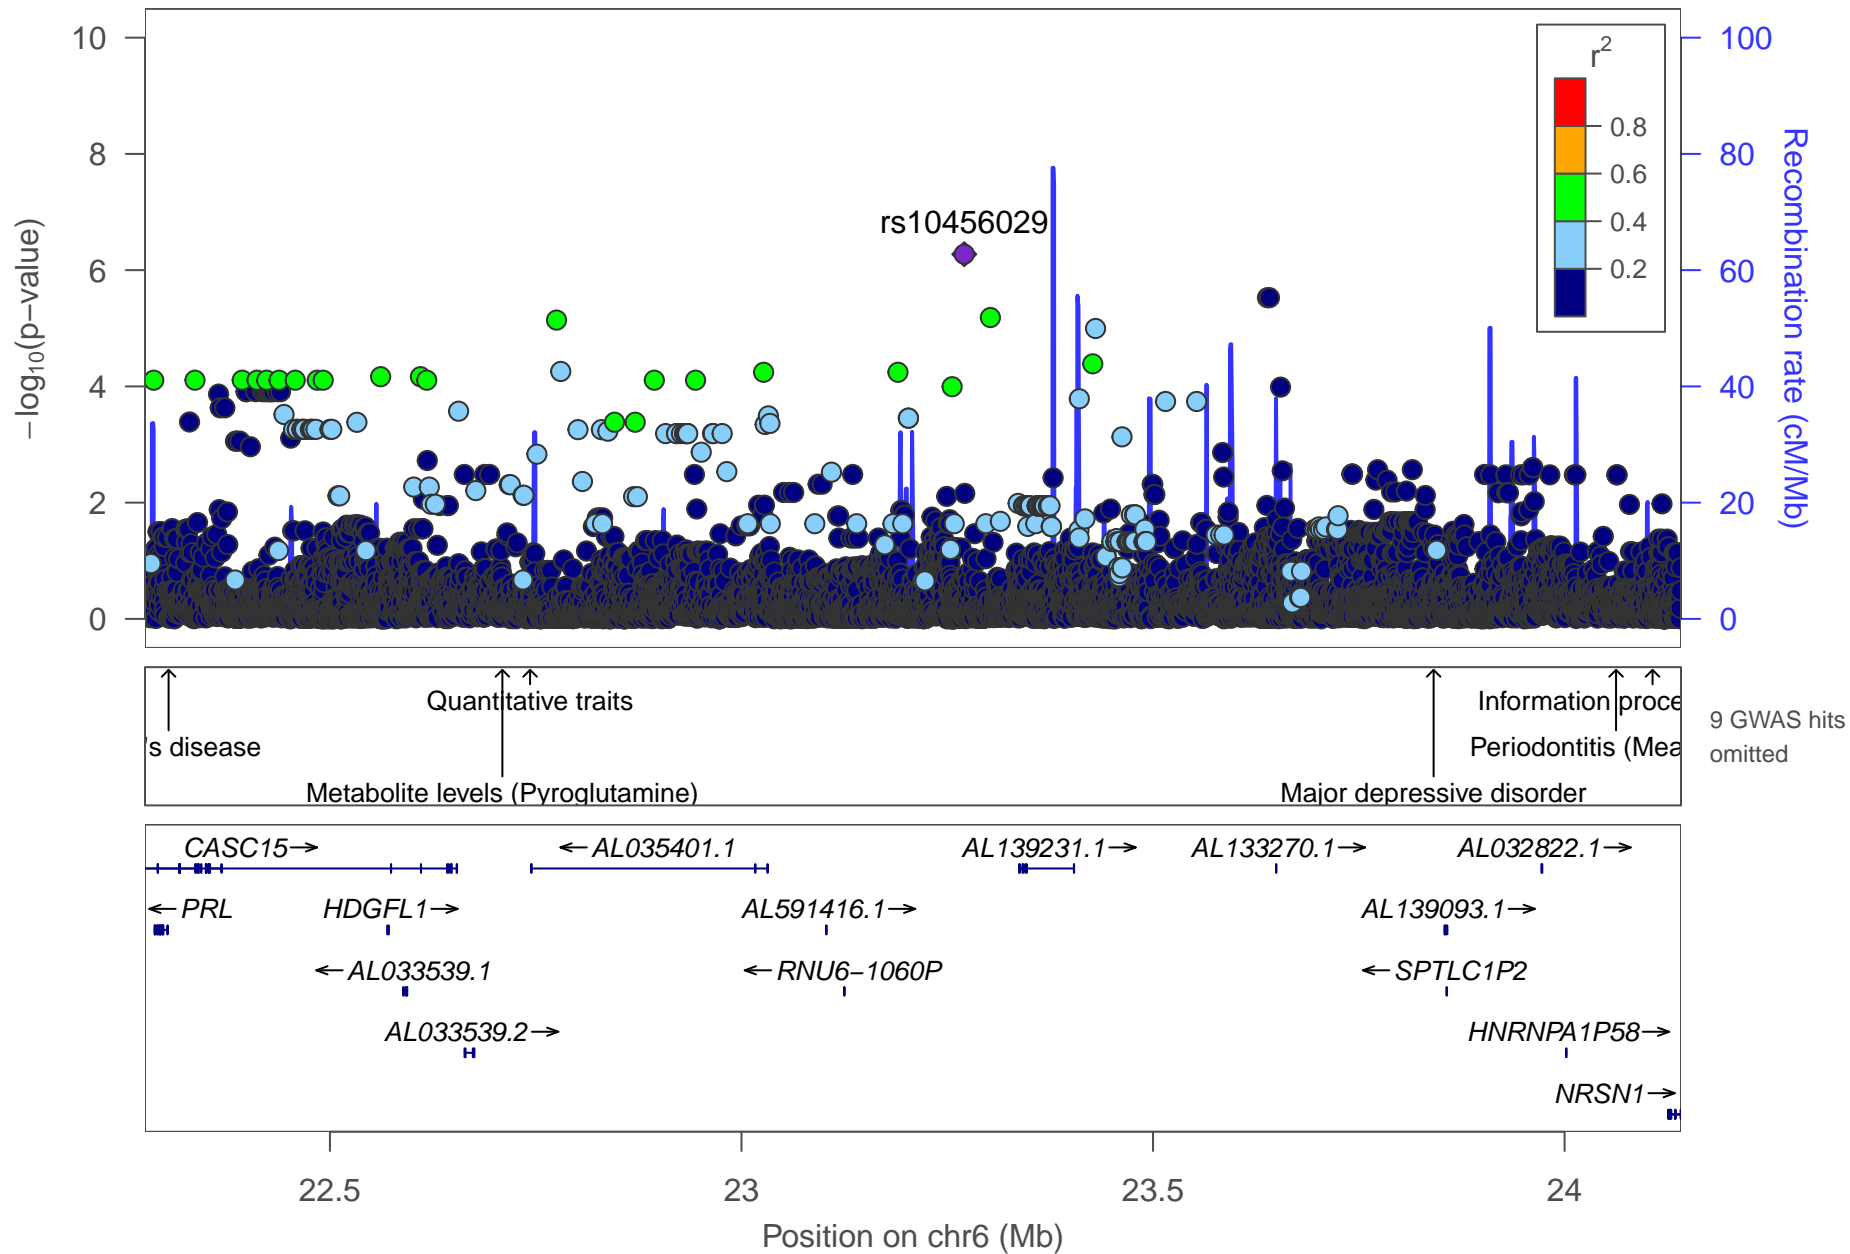

date: Thu Oct 20 22:13:35 2022

build: hg38

display range: chr6:22275312–24141446 [22275312–24141446]

hilite range: 0 – 0 [ 0 – 0 ]

reference SNP: chr6:23270633

number of SNPs plotted: 8410

min P-value: 5.31E-7 [chr6:23270633]

max P-value: 9.99E-1 [chr6:23951286]

omitted GWAS Hits: chr6:23.840904–Major depressive disorder, NA

omitted GWAS Hits: NA, NA

omitted GWAS Hits: NA, NA

GWAS Catalog SNPs in Region

| chr | pos (Mb) | trait                                                                             | snp         |
|-----|----------|-----------------------------------------------------------------------------------|-------------|
| 6   | 22.30398 | Paget's disease                                                                   | rs1341239   |
| 6   | 22.70951 | Metabolite levels (Pyroglutamine)                                                 | rs4712709   |
| 6   | 22.70981 | Number of children (6+ vs. 0 or 1)                                                | rs4712710   |
| 6   | 22.71372 | Number of children (6+ vs. 0 or 1)                                                | rs7775534   |
| 6   | 22.74317 | Quantitative traits                                                               | rs10498712  |
| 6   | 22.75282 | Obesity-related traits                                                            | rs7356884   |
| 6   | 23.07708 | Tourette syndrome                                                                 | rs9393366   |
| 6   | 23.31863 | Late-onset Alzheimer's disease                                                    | rs193129245 |
| 6   | 23.43745 | Immune reponse to smallpox (secreted IL-12p40)                                    | rs7771911   |
| 6   | 23.84090 | Major depressive disorder                                                         | rs9466930   |
| 6   | 24.00633 | Post bronchodilator FEV1 in COPD                                                  | rs138325416 |
| 6   | 24.06256 | Periodontitis (Mean PAL)                                                          | rs146696563 |
| 6   | 24.07783 | Response to abacavir-containing treatment in HIV-1 infection (virologic failure)  | rs9358749   |
| 6   | 24.07783 | Response to efavirenz-containing treatment in HIV 1 infection (virologic failure) | rs9358749   |
| 6   | 24.10686 | Information processing speed                                                      | rs6922632   |

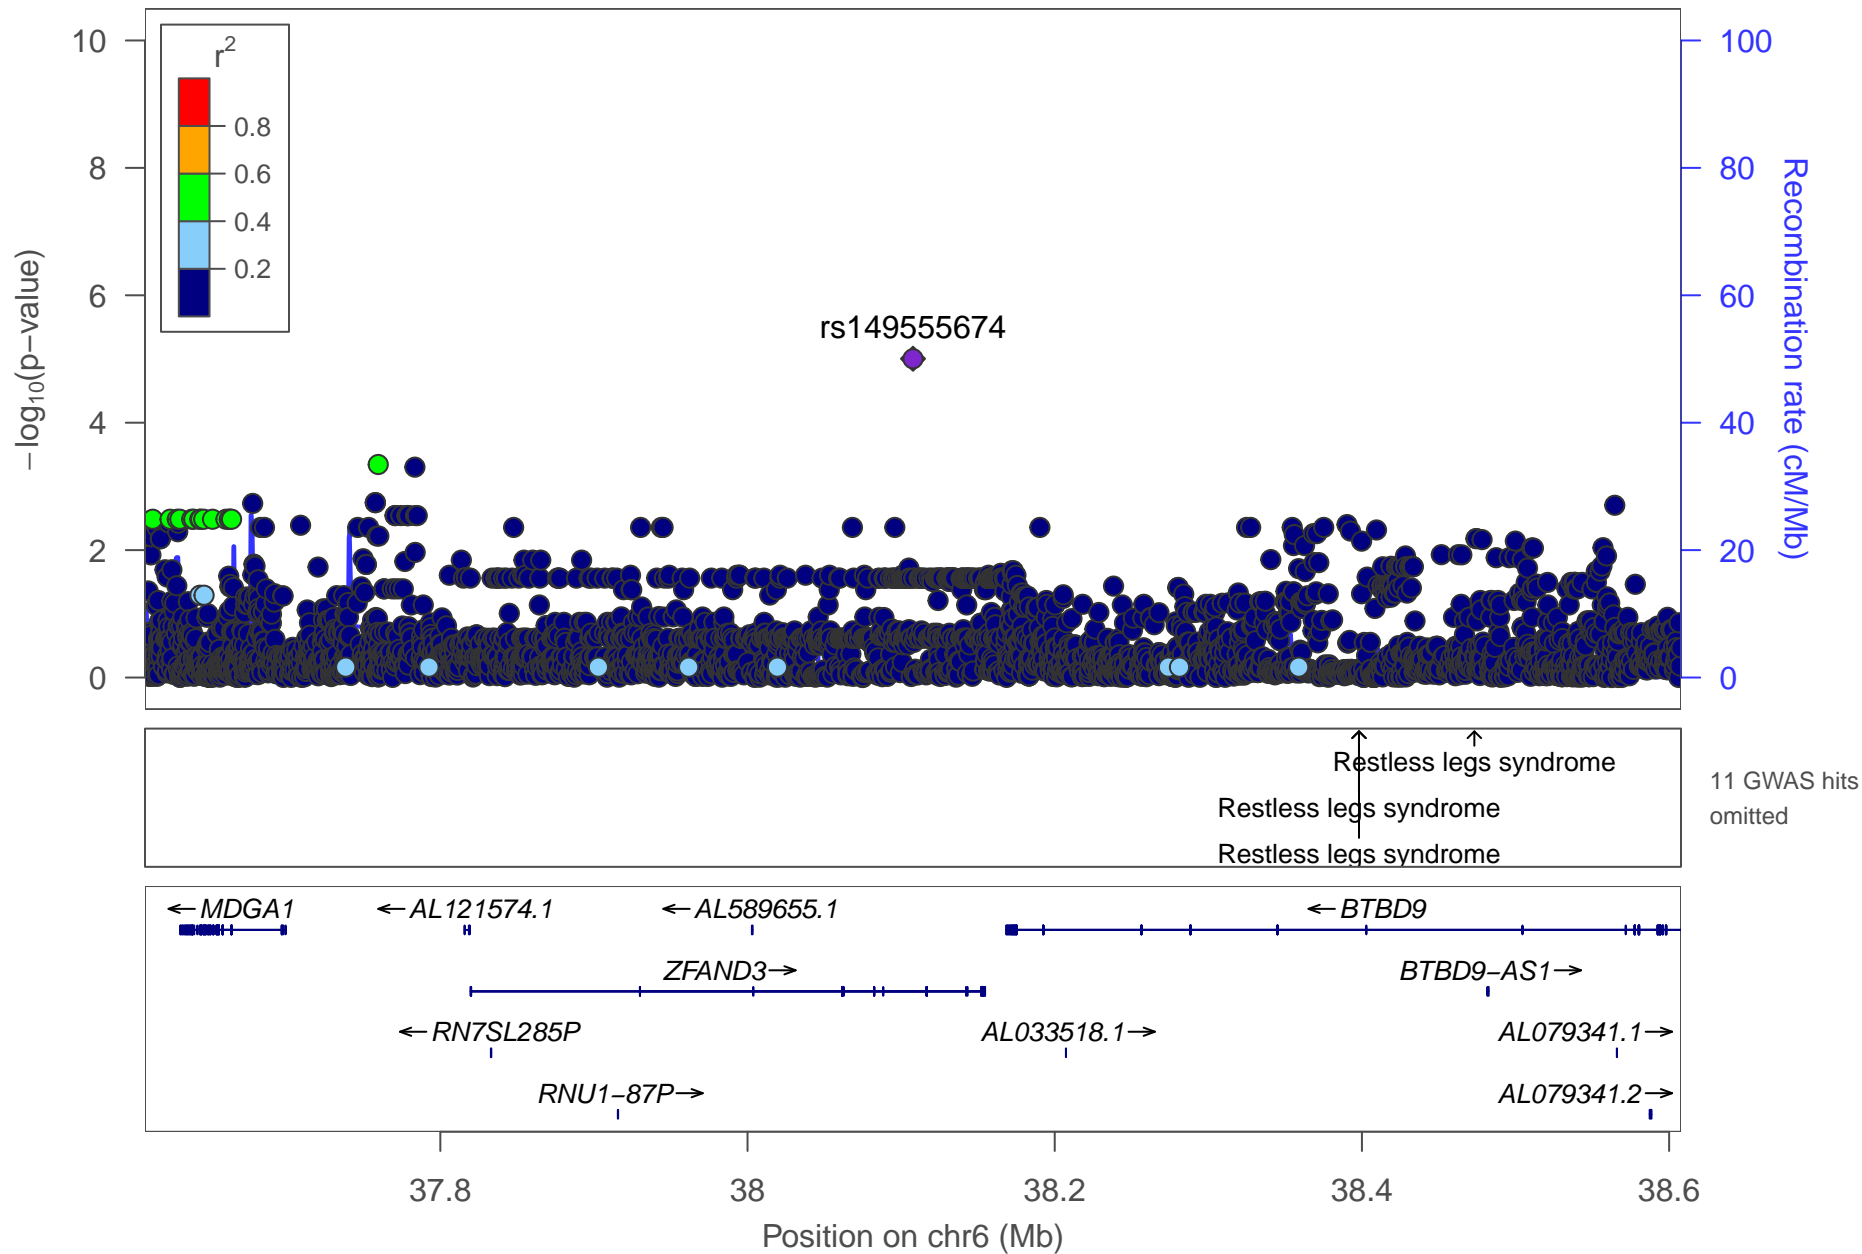

date: Thu Oct 20 22:13:34 2022

build: hg38

display range: chr6:37607725–38607725 [37607725–38607725]

hilite range: 0 – 0 [ 0 – 0 ]

reference SNP: chr6:38107725

number of SNPs plotted: 3196

min P-value:  $9.91E-6$  [chr6:38107725]

max P-value:  $10E-1$  [chr6:38562524]

omitted GWAS Hits: NA, NA

GWAS Catalog SNPs in Region

| chr | pos (Mb) | trait                                        | snp         |
|-----|----------|----------------------------------------------|-------------|
| 6   | 37.67774 | Coronary artery aneurysm in Kawasaki disease | rs12210919  |
| 6   | 37.73083 | Sitting height ratio                         | rs6458016   |
| 6   | 38.06864 | Insulin resistance/response                  | rs17589516  |
| 6   | 38.13907 | Type 2 diabetes                              | rs9470794   |
| 6   | 38.15097 | Post bronchodilator FEV1/FVC ratio           | rs190027738 |
| 6   | 38.28360 | Post bronchodilator FEV1/FVC ratio           | rs77928651  |
| 6   | 38.28604 | Post bronchodilator FEV1/FVC ratio           | rs139632137 |
| 6   | 38.37176 | Post bronchodilator FEV1/FVC ratio in COPD   | rs150713181 |
| 6   | 38.38334 | Post bronchodilator FEV1/FVC ratio in COPD   | rs114407411 |
| 6   | 38.38753 | Post bronchodilator FEV1/FVC ratio in COPD   | rs192452148 |
| 6   | 38.39807 | Restless legs syndrome                       | rs9296249   |
| 6   | 38.39810 | Restless legs syndrome                       | rs9357271   |
| 6   | 38.43236 | Mammographic density                         | rs4565302   |
| 6   | 38.47319 | Restless legs syndrome                       | rs3923809   |

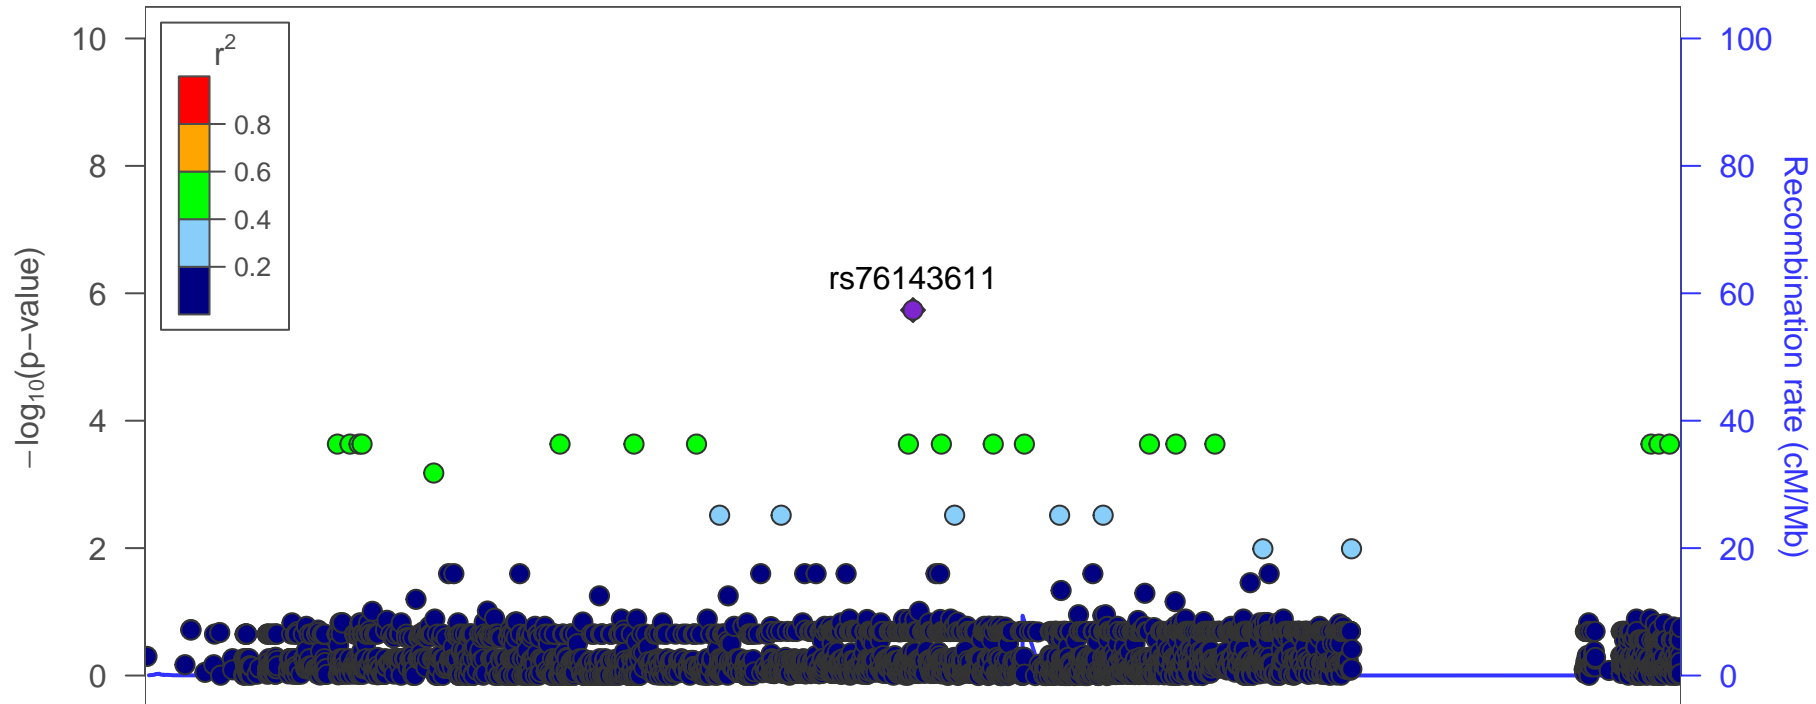

Esophageal adenocarcinoma  
 Digestive system disease (Barrett's esophagus and esophageal adenocarcinoma)  
 Barrett's esophagus or Esophag

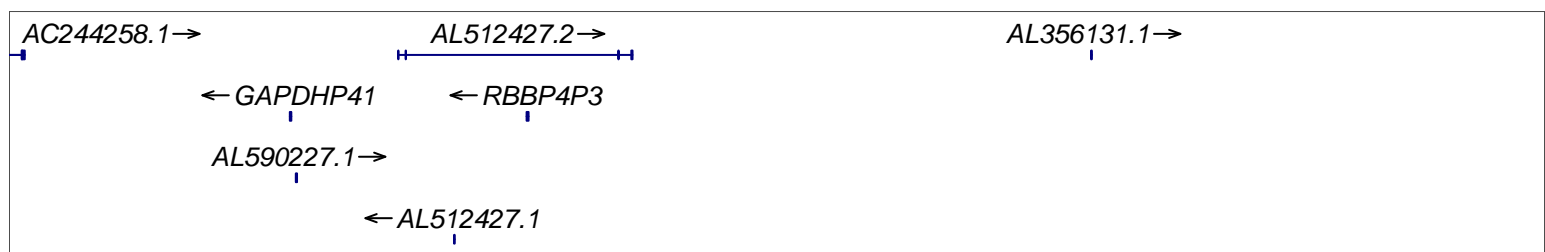

60.6                      60.8                      61                      61.2                      61.4  
 Position on chr6 (Mb)



date: Thu Oct 20 22:13:33 2022

build: hg38

display range: chr6:60536388–61536388 [60536388–61536388]

hilite range: 0 – 0 [ 0 – 0 ]

reference SNP: chr6:61036388

number of SNPs plotted: 3033

min P-value: 1.84E-6 [chr6:61036388]

max P-value: 10E-1 [chr6:61078936]

## GWAS Catalog SNPs in Region

| <b>chr</b> | <b>pos (Mb)</b> | <b>trait</b>                                                                          | <b>snp</b> |
|------------|-----------------|---------------------------------------------------------------------------------------|------------|
| 6          | 61.28585        | Esophageal adenocarcinoma                                                             | rs2342002  |
| 6          | 61.28585        | Digestive system disease (Barrett's esophagus and esophageal adenocarcinoma combined) | rs2342002  |
| 6          | 61.48546        | Barrett's esophagus or Esophageal adenocarcinoma                                      | rs62423175 |

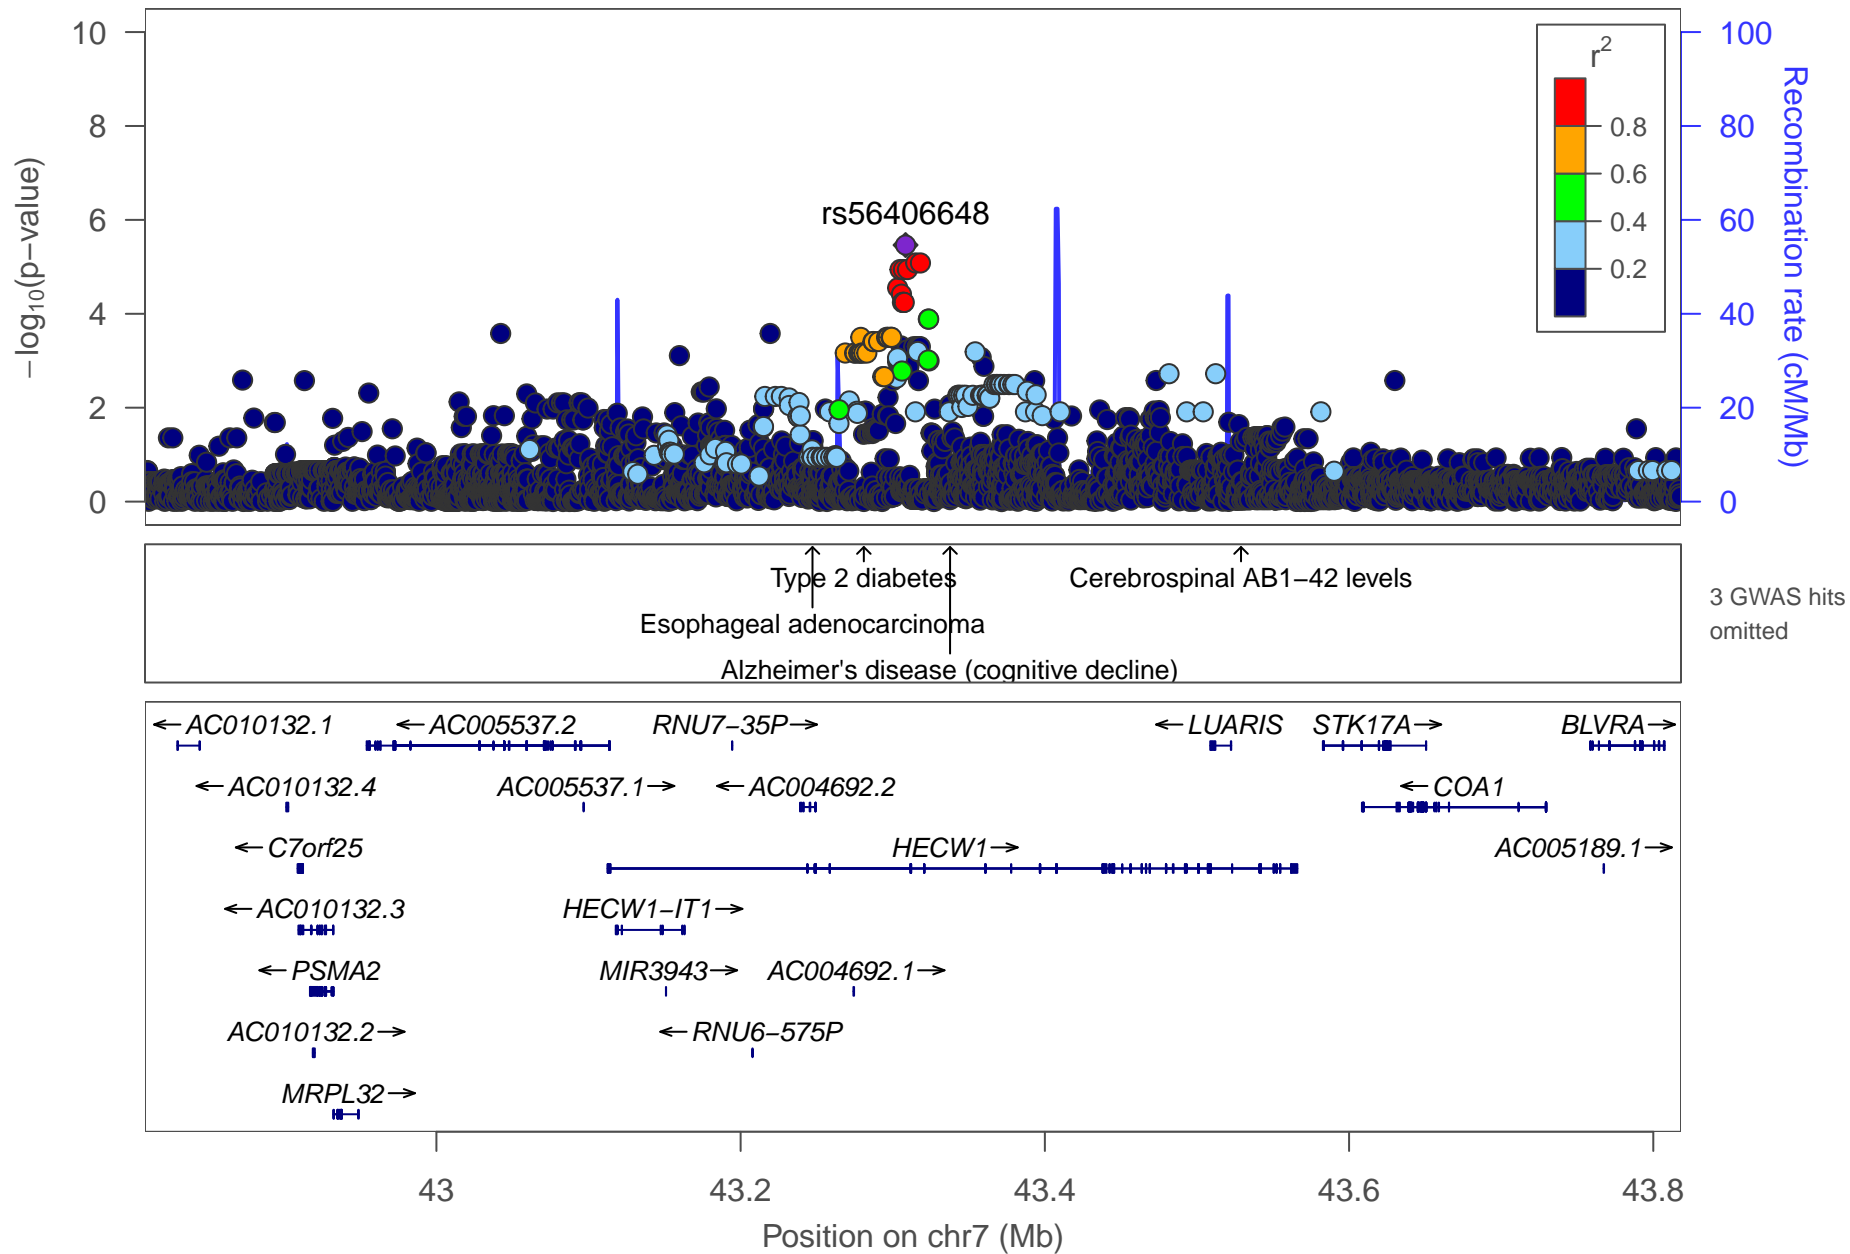

date: Thu Oct 20 22:13:35 2022

build: hg38

display range: chr7:42808424–43818207 [42808424–43818207]

hilite range: 0 – 0 [ 0 – 0 ]

reference SNP: chr7:43308424

number of SNPs plotted: 3546

min P-value: 3.43E–6 [chr7:43308424]

max P-value: 9.99E–1 [chr7:43371610]

omitted GWAS Hits: NA, NA

## GWAS Catalog SNPs in Region

| <b>chr</b> | <b>pos (Mb)</b> | <b>trait</b>                                               | <b>snp</b> |
|------------|-----------------|------------------------------------------------------------|------------|
| 7          | 43.11888        | Obesity-related traits                                     | rs2024125  |
| 7          | 43.18704        | 3-hydroxy-1-methylpropylmercapturic acid levels in smokers | rs73099645 |
| 7          | 43.24724        | Esophageal adenocarcinoma                                  | rs17172185 |
| 7          | 43.28099        | Type 2 diabetes                                            | rs10231619 |
| 7          | 43.29498        | Bone mineral density (Ward's triangle area)                | rs34610745 |
| 7          | 43.33768        | Alzheimer's disease (cognitive decline)                    | rs17172199 |
| 7          | 43.52897        | Cerebrospinal AB1-42 levels                                | rs55704525 |

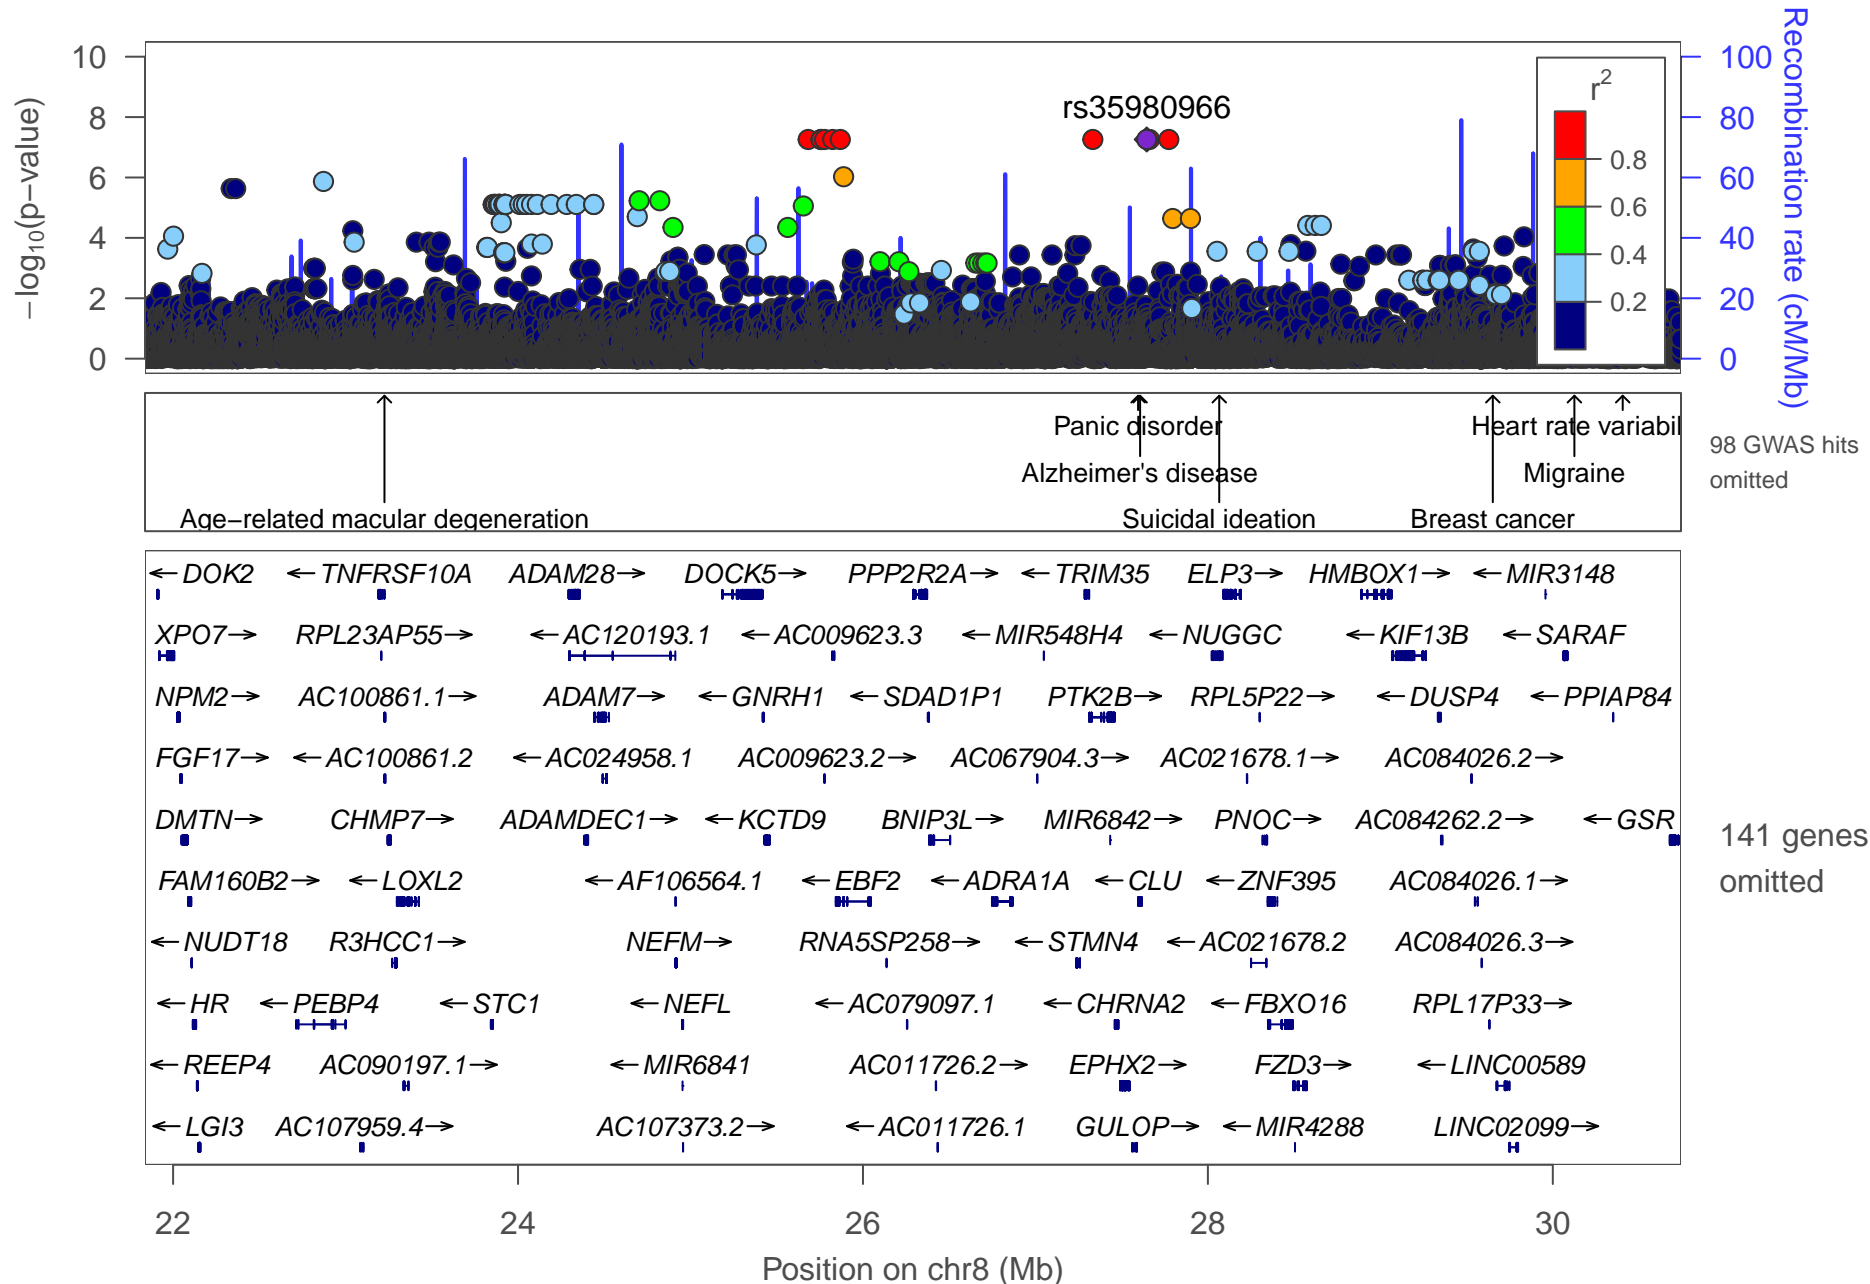

date: Thu Oct 20 22:13:43 2022

build: hg38

display range: chr8:21836974–30743250 [21836974–30743250]

hilite range: 0 – 0 [ 0 – 0 ]

reference SNP: chr8:27645419

number of SNPs plotted: 29523

min P-value: 5.51E–8 [chr8:25682310]

max P-value: 10E–1 [chr8:25282458]

omitted Genes: SFTPC, BMP1, AC105206.1

omitted Genes: AC105206.3, PHYHIP, MIR320A

omitted Genes: POLR3D, AC105206.2, PIWIL2

omitted Genes: SLC39A14, AC105910.1, RNU6–336P

omitted Genes: PPP3CC, AC087854.1, AC087854.2

omitted Genes: SORBS3, AC037459.4, AC037459.3

omitted Genes: PDLIM2, AC037459.1, C8orf58

omitted Genes: CCAR2, AC037459.2, BIN3

omitted Genes: AC105046.1, EGR3, AC055854.1

omitted Genes: AC105046.2, AC037441.1, AC037441.2

omitted Genes: RN7SL303P, AC107959.1, RHOBTB2

omitted Genes: TNFRSF10B, AC107959.2, AC107959.3

omitted Genes: AC107959.5, TNFRSF10C, TNFRSF10D

omitted Genes: TNFRSF10A–AS1, ENTPD4, AC104561.1

omitted Genes: AC104561.2, AC104561.4, AC104561.3

Make more plots at <http://csg.sph.umich.edu/locuszoom/>

GWAS Catalog SNPs in Region

| chr | pos (Mb) | trait                                                                           | snp         |
|-----|----------|---------------------------------------------------------------------------------|-------------|
| 8   | 21.85392 | Neuropathic pain in type 2 diabetes                                             | rs17428041  |
| 8   | 21.96330 | Mean corpuscular volume                                                         | rs7843479   |
| 8   | 22.02703 | Obesity-related traits                                                          | rs11776272  |
| 8   | 22.12086 | Obesity-related traits                                                          | rs76547188  |
| 8   | 22.22420 | Subjective well-being                                                           | rs4075536   |
| 8   | 22.23092 | Hypertriglyceridemia                                                            | rs12541335  |
| 8   | 22.40682 | Verbal declarative memory                                                       | rs7828089   |
| 8   | 22.54348 | HIV-1 viral setpoint                                                            | rs4872511   |
| 8   | 22.54733 | HIV-1 viral setpoint                                                            | rs2280890   |
| 8   | 22.60534 | Exploratory eye movement dysfunction in schizophrenia (cognitive search score)  | rs11778693  |
| 8   | 22.60534 | Exploratory eye movement dysfunction in schizophrenia (responsive search score) | rs11778693  |
| 8   | 22.64432 | Exploratory eye movement dysfunction in schizophrenia (cognitive search score)  | rs4242434   |
| 8   | 22.76204 | Visceral fat                                                                    | rs11998649  |
| 8   | 22.78619 | Asymmetrical dimethylarginine levels                                            | rs12155789  |
| 8   | 22.90573 | Preschool internalizing problems                                                | rs6557600   |
| 8   | 23.08115 | Parasitemia in <i>Trypanosoma cruzi</i> seropositivity                          | rs57302454  |
| 8   | 23.10484 | Exploratory eye movement dysfunction in schizophrenia (responsive search score) | rs4077341   |
| 8   | 23.22546 | Age-related macular degeneration                                                | rs13278062  |
| 8   | 23.22546 | Advanced age-related macular degeneration                                       | rs79037040  |
| 8   | 23.24411 | Attention deficit hyperactivity disorder                                        | rs7463256   |
| 8   | 23.64975 | Prostate cancer                                                                 | rs142463603 |



GWAS Catalog SNPs in Region

| chr | pos (Mb) | trait                                                    | snp         |
|-----|----------|----------------------------------------------------------|-------------|
| 8   | 23.64987 | Post bronchodilator FEV1/FVC ratio in COPD               | rs147410223 |
| 8   | 23.64987 | Post bronchodilator FEV1/FVC ratio                       | rs147410223 |
| 8   | 23.66895 | Prostate cancer                                          | rs1512268   |
| 8   | 23.67650 | Prostate cancer                                          | rs10503733  |
| 8   | 23.72671 | Treatment response for severe sepsis                     | rs13273073  |
| 8   | 23.74581 | Waist-to-hip ratio adjusted for body mass index          | rs7830933   |
| 8   | 23.77877 | Response to mTOR inhibitor (everolimus)                  | rs218869    |
| 8   | 23.78598 | Preschool internalizing problems                         | rs310272    |
| 8   | 23.85748 | Glomerular filtration rate (creatinine)                  | rs3758086   |
| 8   | 23.89364 | Glomerular filtration rate in non diabetics (creatinine) | rs10109414  |
| 8   | 23.89364 | Chronic kidney disease                                   | rs10109414  |
| 8   | 23.89364 | Glomerular filtration rate                               | rs10109414  |
| 8   | 23.91949 | Urate levels                                             | rs17786744  |
| 8   | 23.96117 | Subcutaneous adipose tissue                              | rs7833268   |
| 8   | 24.18679 | Migraine – clinic-based                                  | rs11777116  |
| 8   | 24.25879 | Height                                                   | rs1013209   |
| 8   | 24.35133 | Hair greying                                             | rs7009516   |
| 8   | 24.37684 | Post bronchodilator FEV1                                 | rs147851892 |
| 8   | 24.37684 | Post bronchodilator FEV1/FVC ratio                       | rs147851892 |
| 8   | 24.52123 | White matter integrity                                   | rs11781622  |
| 8   | 24.53775 | Post bronchodilator FEV1/FVC ratio                       | rs113414285 |

GWAS Catalog SNPs in Region

| chr | pos (Mb) | trait                                                                                            | snp         |
|-----|----------|--------------------------------------------------------------------------------------------------|-------------|
| 8   | 24.54313 | Post bronchodilator FEV1/FVC ratio                                                               | rs111754512 |
| 8   | 24.67568 | Cingulate cortical amyloid beta load                                                             | rs4625043   |
| 8   | 24.87716 | Seasonality                                                                                      | rs196889    |
| 8   | 24.94223 | Response to anti-retroviral therapy (ddl/d4T) in HIV-1 infection (Grade 2 peripheral neuropathy) | rs6557786   |
| 8   | 25.25409 | Post bronchodilator FEV1/FVC ratio                                                               | rs187162159 |
| 8   | 25.27121 | Post bronchodilator FEV1/FVC ratio                                                               | rs182115318 |
| 8   | 25.27219 | Post bronchodilator FEV1                                                                         | rs182387400 |
| 8   | 25.27219 | Post bronchodilator FEV1/FVC ratio                                                               | rs182387400 |
| 8   | 25.27272 | Post bronchodilator FEV1                                                                         | rs147913210 |
| 8   | 25.27272 | Post bronchodilator FEV1/FVC ratio                                                               | rs147913210 |
| 8   | 25.27394 | Post bronchodilator FEV1/FVC ratio                                                               | rs150281976 |
| 8   | 25.27401 | Post bronchodilator FEV1/FVC ratio                                                               | rs190951784 |
| 8   | 25.33919 | Glucose homeostasis traits                                                                       | rs13267838  |
| 8   | 25.68716 | Response to efavirenz-containing treatment in HIV 1 infection (virologic failure)                | rs9314308   |
| 8   | 25.84990 | Inguinal hernia                                                                                  | rs6991952   |
| 8   | 26.03463 | Prostate cancer                                                                                  | rs11135910  |
| 8   | 26.09183 | Multiple system atrophy                                                                          | rs4872401   |
| 8   | 26.34856 | Height                                                                                           | rs1594829   |
| 8   | 26.41167 | Schizophrenia                                                                                    | rs1042992   |
| 8   | 26.45458 | Cognitive decline rate in late mild cognitive impairment                                         | rs77609452  |
| 8   | 26.85736 | Blood metabolite levels                                                                          | rs13278849  |

GWAS Catalog SNPs in Region

| chr | pos (Mb) | trait                                                              | snp        |
|-----|----------|--------------------------------------------------------------------|------------|
| 8   | 26.86136 | Response to amphetamines                                           | rs4732957  |
| 8   | 27.03703 | Epilepsy and lamotrigine-induced maculopapular eruptions           | rs7461897  |
| 8   | 27.06460 | Musician's dystonia                                                | rs17060993 |
| 8   | 27.21908 | Bipolar disorder and schizophrenia                                 | rs1446682  |
| 8   | 27.33760 | Alzheimer's disease (late onset)                                   | rs28834970 |
| 8   | 27.37004 | Crohn's disease                                                    | rs17057051 |
| 8   | 27.37004 | Inflammatory bowel disease                                         | rs17057051 |
| 8   | 27.42717 | Neuroticism                                                        | rs3779635  |
| 8   | 27.45860 | Alzheimer's disease in APOE e4- carriers                           | rs2271920  |
| 8   | 27.47050 | Schizophrenia                                                      | rs2565065  |
| 8   | 27.48027 | Response to zileuton treatment in asthma (FEV1 change interaction) | rs2741335  |
| 8   | 27.55928 | Dental caries                                                      | rs17057381 |
| 8   | 27.58461 | Schizophrenia                                                      | rs73229090 |
| 8   | 27.59533 | Panic disorder                                                     | rs17466684 |
| 8   | 27.59874 | Alzheimer's disease in APOE e4- carriers                           | rs2279590  |
| 8   | 27.60700 | Alzheimer's disease                                                | rs11136000 |
| 8   | 27.60880 | Alzheimer's disease (late onset)                                   | rs1532278  |
| 8   | 27.61017 | Alzheimer's disease (late onset)                                   | rs9331896  |
| 8   | 27.61017 | Alzheimer's disease in APOE e4+ carriers                           | rs9331896  |
| 8   | 27.63027 | Alzheimer's disease                                                | rs569214   |
| 8   | 27.69901 | Plasma clusterin levels                                            | rs4545046  |

GWAS Catalog SNPs in Region

| chr | pos (Mb) | trait                                                                 | snp        |
|-----|----------|-----------------------------------------------------------------------|------------|
| 8   | 27.88290 | Adverse response to chemotherapy (neutropenia/leucopenia) (cisplatin) | rs11774576 |
| 8   | 27.94608 | Low vWF levels                                                        | rs4276643  |
| 8   | 28.04837 | Cardiac Troponin-T levels                                             | rs6983473  |
| 8   | 28.06587 | Suicidal ideation                                                     | rs4732812  |
| 8   | 28.20446 | Childhood body mass index                                             | rs13253111 |
| 8   | 28.32424 | IgG glycosylation                                                     | rs11779594 |
| 8   | 28.74727 | Height                                                                | rs10448080 |
| 8   | 28.93364 | Obesity-related traits                                                | rs2221894  |
| 8   | 29.09737 | Metabolite levels (X-11787)                                           | rs7844537  |
| 8   | 29.13751 | Metabolite levels (HVA-5-HIAA Factor score)                           | rs13251954 |
| 8   | 29.22477 | PR interval in <i>Tripanosoma cruzi</i> seropositivity                | rs75609241 |
| 8   | 29.24854 | Metabolite levels (HVA)                                               | rs2954793  |
| 8   | 29.29626 | Corticobasal degeneration                                             | rs643472   |
| 8   | 29.48694 | Colorectal cancer                                                     | rs12548021 |
| 8   | 29.50279 | Response to statin therapy                                            | rs10091038 |
| 8   | 29.65210 | Breast cancer                                                         | rs9693444  |
| 8   | 29.85874 | Diisocyanate-induced asthma                                           | rs16876083 |
| 8   | 30.12500 | Migraine                                                              | rs12681963 |
| 8   | 30.40527 | Heart rate variability traits                                         | rs2979481  |
| 8   | 30.57934 | Metabolite levels (X-11787)                                           | rs10503871 |
| 8   | 30.64134 | Cognitive performance                                                 | rs2978263  |

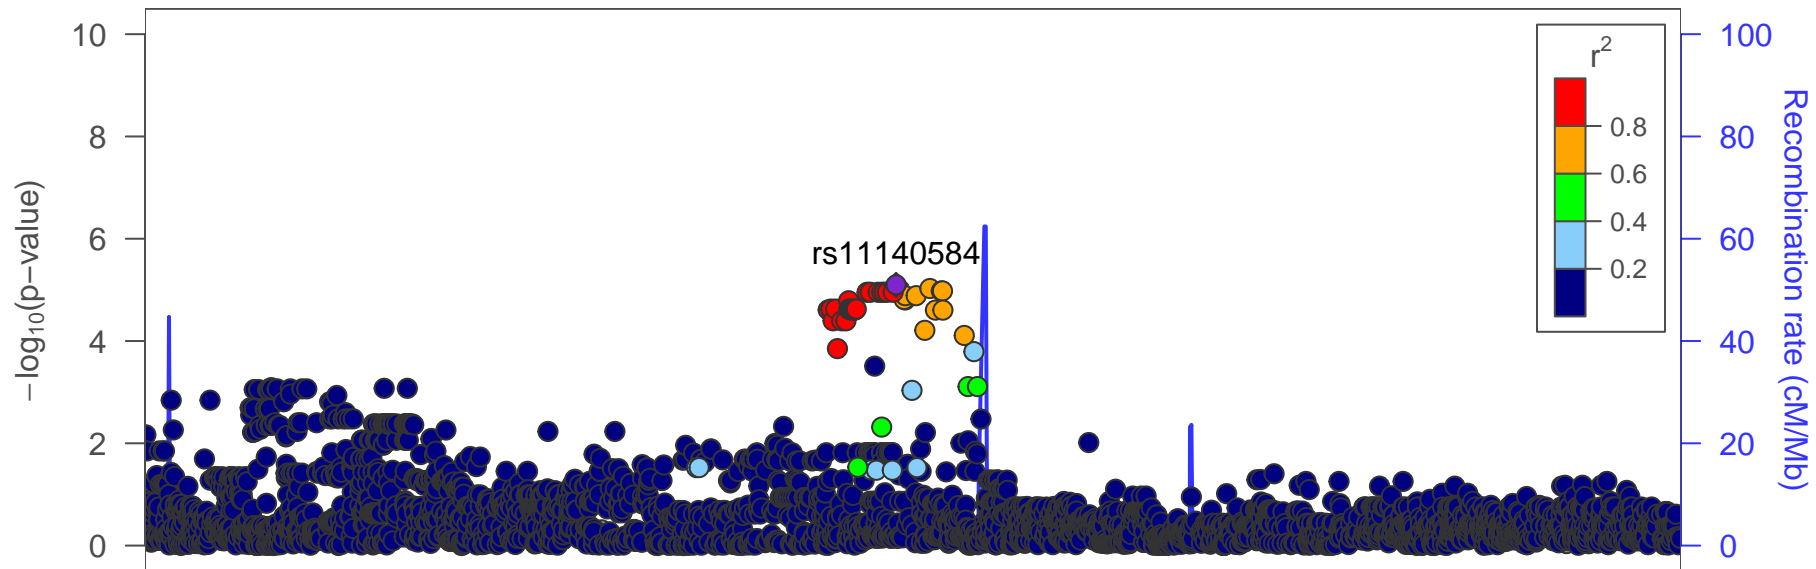

Schizophrenia  
 educational attainment (years of education)

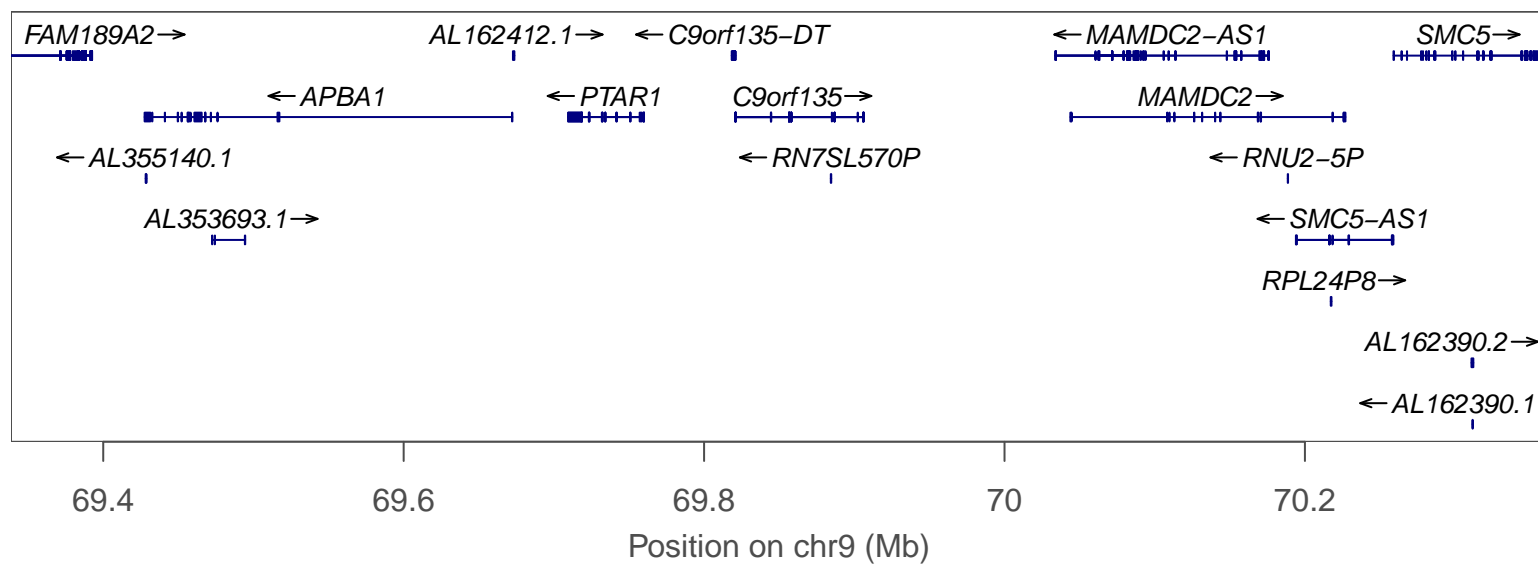

date: Thu Oct 20 22:13:35 2022

build: hg38

display range: chr9:69338597–70361150 [69338597–70361150]

hilite range: 0 – 0 [ 0 – 0 ]

reference SNP: chr9:69838597

number of SNPs plotted: 3077

min P-value: 7.96E–6 [chr9:69838597]

max P-value: 9.99E–1 [chr9:69679829]

## GWAS Catalog SNPs in Region

| <b>chr</b> | <b>pos (Mb)</b> | <b>trait</b>                                | <b>snp</b> |
|------------|-----------------|---------------------------------------------|------------|
| 9          | 69.44024        | Educational attainment (years of education) | rs7033137  |
| 9          | 69.47232        | Schizophrenia                               | rs4744901  |
